# Supplementary material for: Palladium-catalyzed N-arylation of (hetero)aryl chlorides with pyrroles and their analogues
Source: Royal Society of Chemistry journal article supplement (doi:10.1039/d4ob01907e), 2024-12-26

# Supporting Information

## Palladium-catalyzed *N*-arylation of (hetero)aryl chlorides with pyrroles and their analogues

Ying Yin,<sup>†, #</sup> Yuxuan Xiao,<sup>†, #</sup> Xun Yang,<sup>†</sup> Haiyan Li,<sup>†</sup> Jiahui Du,<sup>†</sup> Wengui Duan<sup>\*, †</sup> and Lin Yu<sup>\*, †</sup>

<sup>†</sup> *School of Chemistry and Chemical Engineering, Guangxi Colleges and Universities Key Laboratory of Applied Chemistry Technology and Resource Development, Guangxi University, Nanning 530004, Guangxi, P. R. China.*

<sup>#</sup> *Y. Yin and Y. Xiao contributed equally.*

E-mail: \*linyu@gxu.edu.cn; \*wgduan@gxu.edu.cn

### Table of Contents

|                                                                          |            |
|--------------------------------------------------------------------------|------------|
| <b>1. General Information .....</b>                                      | <b>S2</b>  |
| <b>2. Optimization of the Reaction Conditions .....</b>                  | <b>S2</b>  |
| <b>3. General Procedure for Starting Materials and Products .....</b>    | <b>S3</b>  |
| <b>4. Characterization Data of Starting Materials and Products .....</b> | <b>S6</b>  |
| <b>5. Gram-Scale Experiments .....</b>                                   | <b>S21</b> |
| <b>6. References .....</b>                                               | <b>S21</b> |
| <b>7. NMR Spectra of Starting Materials and Products .....</b>           | <b>S23</b> |

## 1. General Information

$^1\text{H}$  NMR spectra were recorded on Bruker 600 MHz spectrometer and the chemical shifts were reported in parts per million ( $\delta$ ) relative to internal solvent signal (7.261 ppm in  $\text{CDCl}_3$ , 2.500 ppm in  $\text{DMSO}-d_6$ , 7.160 ppm in  $\text{C}_6\text{D}_6$ ). The peak patterns are indicated as follows: s, singlet; d, doublet; dd, doublet of doublet; t, triplet; q, quartet; m, multiplet. The coupling constants,  $J$ , are reported in Hertz (Hz).  $^{13}\text{C}$  NMR spectra were obtained at Bruker 151 MHz and referenced to the internal solvent signals (central peak is 77.000 ppm in  $\text{CDCl}_3$ , 40.000 ppm in  $\text{DMSO}-d_6$ , 128.10 ppm in  $\text{C}_6\text{D}_6$ ).  $\text{CDCl}_3$ ,  $\text{DMSO}-d_6$  and  $\text{C}_6\text{D}_6$  were used as the NMR solvent. Thermo Q Exactive was used for HRMS and ESI-MS. Thermo Fisher Q Exactive (ORBITrap) was used for HRMS and APCI-MS.

Unless otherwise noted, all reagents were purchased from commercial suppliers (Energy-Chemical, Bidepharm, Heowns, or TCI) and used without further purification. Flash column chromatography was performed over silica gel 200-300. The reagents were weighed and handled in a glove box. All reactions were heated by metal sand bath (WATTCAS, LAB-500, <https://www.wattcas.com>).

## 2. Optimization of the Reaction Conditions

Table S1. Optimization of the reaction conditions <sup>a,b</sup>

$\text{1a} + \text{2a} \xrightarrow[\text{solvent, N}_2, 50\text{ }^\circ\text{C, 12 h}]{\text{Pd catalyst (0.8 mol\%), ligand (0.8 mol\%), base (1.0 equiv)}} \text{3a}$

| entry           | catalyst                             | ligand    | base                                              | solvent           | yield/ <b>3a</b> /% |
|-----------------|--------------------------------------|-----------|---------------------------------------------------|-------------------|---------------------|
| 1               | $\text{Pd}(\text{acac})_2$           | keYPhos   | $t\text{-BuOK}$                                   | dioxane           | n.d.                |
| 2               | $\text{Pd}(\text{acac})_2$           | keYPhos   | $t\text{-BuOK}$                                   | $\text{PhCF}_3$   | n.d.                |
| 3               | $\text{Pd}(\text{acac})_2$           | keYPhos   | $t\text{-BuOK}$                                   | DMSO              | n.d.                |
| 4               | $\text{Pd}(\text{acac})_2$           | keYPhos   | $t\text{-BuOK}$                                   | toluene           | 31                  |
| 5               | $\text{Pd}(\text{acac})_2$           | keYPhos   | $t\text{-BuOK}$                                   | MTBE              | 40                  |
| 6               | $\text{Pd}(\text{acac})_2$           | keYPhos   | $t\text{-BuOK}$                                   | CPME              | 42                  |
| 7               | $\text{Pd}(\text{acac})_2$           | keYPhos   | $t\text{-BuOK}$                                   | THF               | n.d.                |
| 8               | $\text{Pd}(\text{acac})_2$           | keYPhos   | $t\text{-BuOK}$                                   | <i>n</i> -heptane | 51                  |
| 9               | $\text{Pd}(\text{acac})_2$           | keYPhos   | $t\text{-BuOK}$                                   | DMF               | n.d.                |
| 10              | $\text{Pd}(\text{acac})_2$           | keYPhos   | $t\text{-BuOK}$                                   | <i>n</i> -hexane  | 49                  |
| 11              | $\text{Pd}(\text{acac})_2$           | keYPhos   | $t\text{-BuOK}$                                   | <i>c</i> -hexane  | 47                  |
| 12              | $\text{Pd}(\text{acac})_2$           | keYPhos   | $t\text{-BuOK}$                                   | DMA               | n.d.                |
| 13              | $\text{Pd}(\text{acac})_2$           | keYPhos   | $t\text{-BuOK}$                                   | MeCN              | n.d.                |
| 14              | $\text{Pd}(\text{acac})_2$           | keYPhos   | $t\text{-BuOK}$                                   | DME               | n.d.                |
| 15              | $\text{Pd}(\text{P}^t\text{Bu}_3)_2$ | keYPhos   | $t\text{-BuOK}$                                   | <i>n</i> -heptane | 53                  |
| 16              | $\text{Pd}(\text{PPh}_3)_4$          | keYPhos   | $t\text{-BuOK}$                                   | <i>n</i> -heptane | 50                  |
| 17              | $\text{Pd}(\text{dba})_2$            | keYPhos   | $t\text{-BuOK}$                                   | <i>n</i> -heptane | 62                  |
| 18              | $\text{Pd}(\text{dba})_2$            | keYPhos   | $\text{Cs}_2\text{CO}_3$                          | <i>n</i> -heptane | n.d.                |
| 19              | $\text{Pd}(\text{dba})_2$            | keYPhos   | $t\text{-BuONa}$                                  | <i>n</i> -heptane | 52                  |
| 20              | $\text{Pd}(\text{dba})_2$            | keYPhos   | $t\text{-BuOLi}$                                  | <i>n</i> -heptane | 78                  |
| 21              | $\text{Pd}(\text{dba})_2$            | keYPhos   | $\text{K}_2\text{CO}_3$                           | <i>n</i> -heptane | n.d.                |
| 22              | $\text{Pd}(\text{dba})_2$            | keYPhos   | $\text{K}_3\text{PO}_4$                           | <i>n</i> -heptane | 35                  |
| 23              | $\text{Pd}(\text{dba})_2$            | keYPhos   | $\text{K}_3\text{PO}_4 \cdot 3\text{H}_2\text{O}$ | <i>n</i> -heptane | 20                  |
| 24              | $\text{Pd}(\text{dba})_2$            | keYPhos   | DBU                                               | <i>n</i> -heptane | trace               |
| 25              | $\text{Pd}(\text{dba})_2$            | keYPhos   | NaOH                                              | <i>n</i> -heptane | 10                  |
| 26              | $\text{Pd}(\text{dba})_2$            | keYPhos   | MeOK                                              | <i>n</i> -heptane | trace               |
| 27 <sup>c</sup> | $\text{Pd}(\text{dba})_2$            | BrettPhos | $t\text{-BuOLi}$                                  | <i>n</i> -heptane | 56                  |

|    |                                    |                |                    |                   |                   |
|----|------------------------------------|----------------|--------------------|-------------------|-------------------|
| 28 | Pd(dba) <sub>2</sub>               | XPhos          | <sup>t</sup> BuOLi | <i>n</i> -heptane | 52 <sup>c</sup>   |
| 29 | Pd(dba) <sub>2</sub>               | SPhos          | <sup>t</sup> BuOLi | <i>n</i> -heptane | 49 <sup>c</sup>   |
| 30 | Pd(dba) <sub>2</sub>               | 1,10-Phen      | <sup>t</sup> BuOLi | <i>n</i> -heptane | n.d.              |
| 31 | Pd(dba) <sub>2</sub>               | 2,2-Bipyridine | <sup>t</sup> BuOLi | <i>n</i> -heptane | n.d.              |
| 32 | Pd(dba) <sub>2</sub>               | keYPhos        | <sup>t</sup> BuOLi | <i>n</i> -heptane | 78 <sup>d</sup>   |
| 33 | Pd(dba) <sub>2</sub>               | keYPhos        | <sup>t</sup> BuOLi | <i>n</i> -heptane | 79 <sup>e</sup>   |
| 34 | Pd(dba) <sub>2</sub>               | keYPhos        | <sup>t</sup> BuOLi | <i>n</i> -heptane | 81 <sup>f</sup>   |
| 35 | -                                  | keYPhos        | <sup>t</sup> BuOLi | <i>n</i> -heptane | n.d. <sup>g</sup> |
| 36 | Pd(dba) <sub>2</sub>               | -              | <sup>t</sup> BuOLi | <i>n</i> -heptane | n.d. <sup>h</sup> |
| 37 | Pd(dba) <sub>2</sub>               | keYPhos        | -                  | <i>n</i> -heptane | n.d. <sup>i</sup> |
| 38 | Pd <sub>2</sub> (dba) <sub>3</sub> | keYPhos        | <sup>t</sup> BuOK  | THF               | n.d. <sup>j</sup> |

<sup>a</sup> Reaction conditions: **1a** (0.30 mmol), **2a** (0.45 mmol), catalyst (0.8 mol%), ligand (0.8 mol%), and base (1.0 equiv) in solvent (3.0 mL) at 70 °C for 12 hrs under N<sub>2</sub>; <sup>b</sup> Isolate yield; <sup>c</sup> catalyst (0.8 mol%), ligand (1.6 mol%); <sup>d</sup> at 50 °C; <sup>e</sup> catalyst (1.5 mol%), ligand (1.5 mol%); <sup>f</sup> **1a** (0.33 mmol), **2a** (0.30 mmol), at 50 °C; <sup>g</sup> no catalyst; <sup>h</sup> no ligand; <sup>i</sup> no base; <sup>j</sup> catalyst (0.25 mol%), ligand (0.50 mol%).

### 3. General Procedure for Starting Materials and Products

#### (a) Synthesis of ligands<sup>1</sup>

##### Synthesis of phosphonium salt 1:

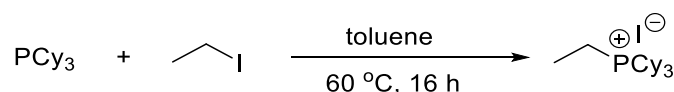

Tricyclohexylphosphine (5.0 g, 17.9 mmol) and ethyl iodide (3.1 g, 19.5 mmol) were added to 30 mL of toluene. The solution was heated at 60 °C overnight and the product precipitated as a colorless solid. The precipitate was filtered off and washed with 2 x 10 mL of toluene. The solid was dried in vacuo for 10 h and the product was obtained as a colorless solid (6.1 g, 14.0 mmol, 80%).

##### Synthesis of keYPhos:

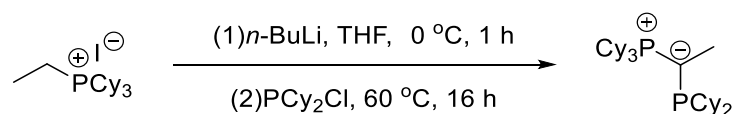

Salt 1 (4.0 g, 9.2 mmol) was placed in 30 mL of THF. The suspension was cooled down to 0 °C and 5.8 mL (9.2 mmol, 1.6 M in hexane) of a *n*-butyllithium solution was added slowly within 30 minutes until the solid was fully dissolved. Chlorodicyclohexylphosphine (2.3 g, 10.1 mmol) was added and it was stirred for 4 h while a colorless solid precipitated. The solvent was removed in vacuo and 1.2 g (10.1 mmol) <sup>t</sup>BuOK and 20 mL toluene were added to the residue and it was stirred overnight. Afterwards, the suspension was filtered over the celite and the solvent of the filtrate was removed in vacuo. The residue was suspended in 20 mL acetonitrile and it was stirred overnight. The suspension was filtered off and the solid was washed with 3 x 10 mL acetonitrile, filtered off and dried in vacuo. The **keYPhos** was obtained as a colorless solid (3.2 g, 6.3 mmol, 69%).

#### (b) Preparation of catalyst stock solution

In a glovebox containing N<sub>2</sub>, 57.5 mg of Pd(dba)<sub>2</sub> (0.10 mmol) and 50.5 mg of keYPhos (0.10 mmol) were weighed, along with 4.0 mL of THF into a dry reaction tube (15 mL). Stir the resulting mixture at room temperature for 0.5 h. The resulting palladium concentration was 0.025 mmol/mL THF, with the keYPhos ligand present at the same concentration.

**(c) General procedure for the product 3 or 4**

**Synthesis of 3:**

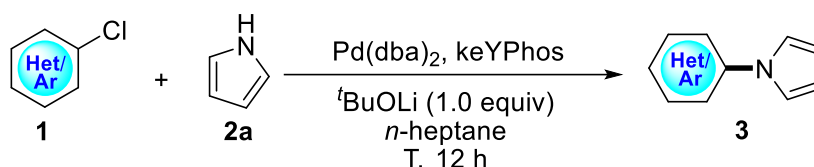

In a glovebox, a flame-dried reaction tube (35 mL) equipped with a magnetic stir bar was charged with <sup>t</sup>BuOLi (24 mg, 0.3 mmol), aryl chlorides **1** (0.33 mmol), pyrrole **2a** (0.3 mmol), *n*-heptane (3.0 mL), and catalyst stock solution (96 uL, 0.8 mol% or 180 uL, 1.5 mol%) before being sealed with a rubber septum. The reaction mixture was stirred at 50 °C, 60 °C or 70 °C for 12 hours. After the mixture was cooled to room temperature, it was filtered directly. The solvent was evaporated in vacuo to give the crude products. The residue was purified by flash column chromatography on silica gel (petroleum ether/ethyl acetate) to give the desired product **3**.

**Synthesis of 4:**

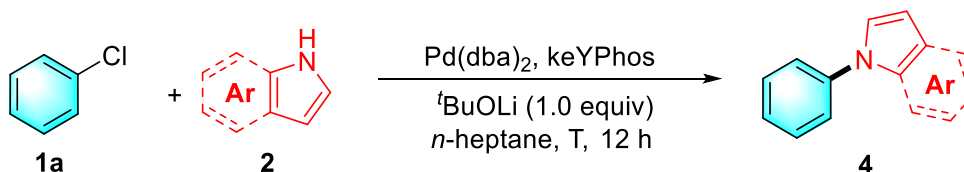

In a glovebox, a flame-dried reaction tube (35 mL) equipped with a magnetic stir bar was charged with <sup>t</sup>BuOLi (24 mg, 0.3 mmol), chlorobenzene **1a** (0.33 mmol), N–H heteroarenes **2** (0.3 mmol), *n*-heptane (3.0 mL), and catalyst stock solution (96 uL, 0.8 mol% or 180 uL, 1.5 mol%) before being sealed with a rubber septum. The reaction mixture was stirred at 50 °C, 60 °C, 65 °C, 70 °C, 80 °C or 90 °C for 12 hours. After the mixture was cooled to room temperature, it was filtered directly. The solvent was evaporated in vacuo to give the crude products. The residue was purified by flash column chromatography on silica gel (petroleum ether/ethyl acetate) to give the desired product **4**.

**(d) General procedure for the starting materials 9a-12a**

**Synthesis of 9a:**

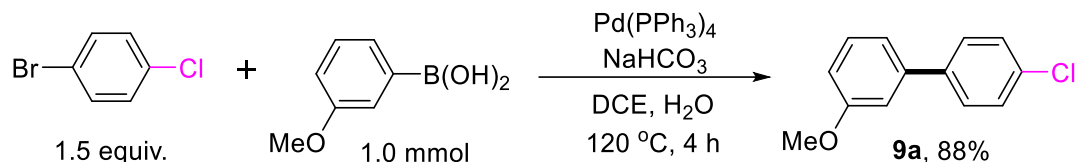

In a glovebox, a flame-dried reaction tube (35 mL) equipped with a magnetic stir bar was charged with  $\text{NaHCO}_3$  (168.0 mg, 2.0 equiv.), 3-methoxyphenylboronic acid (152.0 mg, 1.0 mmol), 4-bromochlorobenzene (287.2 mg, 1.5 equiv.), DCE (6.0 mL),  $\text{H}_2\text{O}$  (3.0 mL) and  $\text{Pd(PPh}_3)_4$  (115.6 mg, 10 mol%) before being sealed with a rubber septum. The reaction mixture was stirred at 120 °C for 4 hours. After the mixture was cooled to room temperature, it was filtered directly. The solvent was evaporated in vacuo to give the crude products. The residue was purified by flash column chromatography on silica gel (petroleum ether/ethyl acetate) to give the desired product **9a**.

#### Synthesis of 10a:

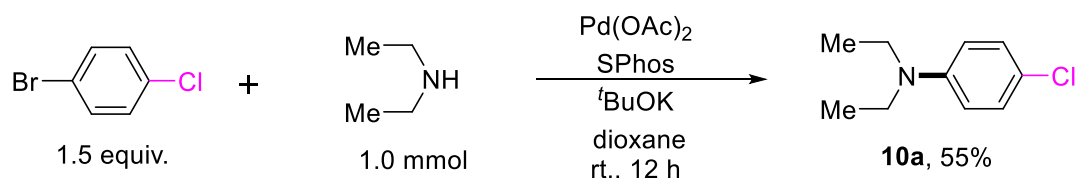

In a glovebox, a flame-dried reaction tube (35 mL) equipped with a magnetic stir bar was charged with  $\text{tBuOK}$  (224.4 mg, 2.0 equiv.), diethylamine (73.1 mg, 1.0 mmol), 4-bromochlorobenzene (287.2 mg, 1.5 equiv.), dioxane (9.0 mL),  $\text{Pd(OAc)}_2$  (22.7 mg, 10 mol%) and SPhos (82.1 mg, 20 mol%) before being sealed with a rubber septum. The reaction mixture was stirred at r.t. for 12 hours. After the mixture was cooled to room temperature, it was filtered directly. The solvent was evaporated in vacuo to give the crude products. The residue was purified by flash column chromatography on silica gel (petroleum ether/ethyl acetate) to give the desired product **10a**.

#### Synthesis of 11a:

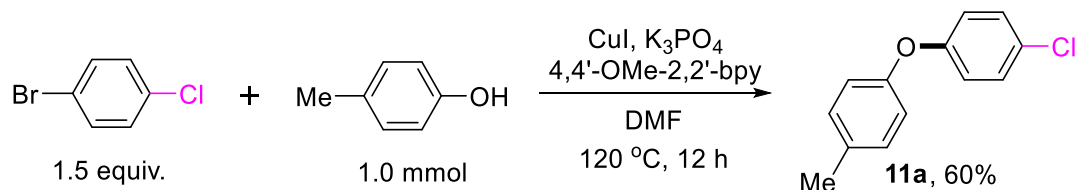

In a glovebox, a flame-dried reaction tube (35 mL) equipped with a magnetic stir bar was charged with  $\text{K}_3\text{PO}_4$  (424.3 mg, 2.0 equiv.), *p*-cresol (108.1 mg, 1.0 mmol), 4-bromochlorobenzene (287.2 mg, 1.5 equiv.), DMF (9.0 mL), CuI (19.0 mg, 10 mol%) and 4,4'-dimethoxy-2,2'-bipyridine (21.6 mg, 20 mol%) before being sealed with a rubber septum. The reaction mixture was stirred at 120 °C for 12 hours. After the mixture was cooled to room temperature, it was filtered directly. The solvent was evaporated in vacuo to give the crude products. The residue was purified by flash column chromatography on silica gel (petroleum ether/ethyl acetate) to give the desired product **11a**.

#### Synthesis of 12a:

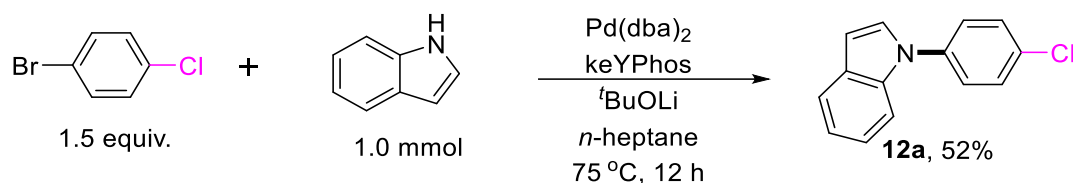

In a glovebox, a flame-dried reaction tube (35 mL) equipped with a magnetic stir bar was charged with  $t\text{BuOLi}$  (80.0 mg, 1.0 equiv.), indole (117.2mg, 1.0 mmol), 4-bromochlorobenzene (287.2mg, 1.5 equiv.),  $n$ -heptane (9.0 mL), and catalyst stock solution (545  $\mu\text{L}$ ) before being sealed with a rubber septum. The reaction mixture was stirred at 75  $^\circ\text{C}$  for 12 hours. After the mixture was cooled to room temperature, it was filtered directly. The solvent was evaporated in vacuo to give the crude products. The residue was purified by flash column chromatography on silica gel (petroleum ether/ethyl acetate) to give the desired product **12a**.

#### 4. Characterization Data of Starting Materials and Products

##### keYPhos

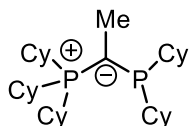

Following the general procedure, the **keYPhos** was obtained as a colorless solid (3.2 g, 6.3 mmol, 69%). The spectral data were in accordance with those reported in the literature.<sup>1</sup>  **$^1\text{H}$  NMR** (600 MHz,  $\text{C}_6\text{D}_6$ )  $\delta$  = 2.40 (q,  $J$  = 12.0, 3H), 2.29 (d,  $J$  = 12.3, 2H), 2.16 (d,  $J$  = 12.2, 2H), 2.01 (dt,  $J$  = 12.7, 6.6, 4H), 1.89 (dd,  $J$  = 13.2, 3.0, 11H), 1.79 (d,  $J$  = 11.5, 2H), 1.75 – 1.69 (m, 6H), 1.61 (dd,  $J$  = 12.5, 3.8, 5H), 1.55 – 1.43 (m, 12H), 1.36 (dd,  $J$  = 8.0, 4.5, 2H), 1.16 (s, 9H).  **$^{13}\text{C}$  NMR** (151 MHz,  $\text{C}_6\text{D}_6$ )  $\delta$  = 38.5 (dd,  $J$  = 13.8, 5.4), 33.7 (d,  $J$  = 19.7), 33.7 (dd,  $J$  = 49.3, 8.8), 33.0 (d,  $J$  = 10.0), 29.0 (d,  $J$  = 7.8), 28.6 (d,  $J$  = 11.9), 28.2 (d,  $J$  = 2.2), 27.9 (d,  $J$  = 11.0), 27.8, 27.0, 14.8 (d,  $J$  = 8.4), -1.7 (dd,  $J$  = 108.6, 20.5).  **$^{31}\text{P}$  NMR** (243 MHz,  $\text{C}_6\text{D}_6$ )  $\delta$  = 30.66 (d,  $J$  = 128.8), 1.06 (d,  $J$  = 128.8).

##### 1-phenyl-1*H*-pyrrole (3a)

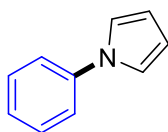

Following the general procedure, the title compound was isolated by Flash column chromatography (PE) as a light brown solid in 81% (34.8 mg) yield. The spectral data were in accordance with those reported in the literature.<sup>2</sup>  **$^1\text{H}$  NMR** (600 MHz,  $\text{CDCl}_3$ )  $\delta$  7.47 – 7.42 (m, 4H), 7.30 – 7.26 (m, 1H), 7.15 – 7.12 (m, 2H), 6.42 – 6.38 (m, 2H).  **$^{13}\text{C}$  NMR** (151 MHz,  $\text{CDCl}_3$ )  $\delta$  140.7, 129.5, 125.6, 120.5, 119.3, 110.4.

##### 1-(*p*-tolyl)-1*H*-pyrrole (3b)

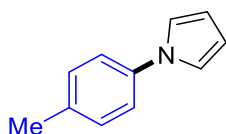

Following the general procedure, the title compound was isolated by Flash column chromatography (PE) as a white crystal in 74% (34.8 mg) yield. The spectral data were in accordance with those reported in the literature.<sup>2</sup> **<sup>1</sup>H NMR** (600 MHz, CDCl<sub>3</sub>) δ 7.31 (d, *J* = 8.3 Hz, 2H), 7.24 (d, *J* = 8.2 Hz, 2H), 7.09 (m, 2H), 6.37 (m, 2H), 2.40 (s, 3H). **<sup>13</sup>C NMR** (151 MHz, CDCl<sub>3</sub>) δ 138.5, 135.3, 130.0, 120.5, 119.3, 110.0, 20.8.

**1-(4-methoxyphenyl)-1*H*-pyrrole (3c)**

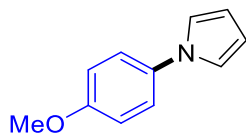

Following the general procedure, the title compound was isolated by Flash column chromatography (PE:EtOAc = 50:1) as a white crystal in 65% (33.9 mg) yield. The spectral data were in accordance with those reported in the literature.<sup>2</sup> **<sup>1</sup>H NMR** (600 MHz, CDCl<sub>3</sub>) δ 7.33 (d, *J* = 9.0 Hz, 2H), 7.03 (m, 2H), 6.97 (d, *J* = 9.0 Hz, 2H), 6.35 (m, 2H), 3.85 (s, 3H). **<sup>13</sup>C NMR** (151 MHz, CDCl<sub>3</sub>) δ 157.6, 134.5, 122.2, 119.6, 114.6, 109.8, 55.5.

**1-(4-(*tert*-butyl)phenyl)-1*H*-pyrrole (3d)**

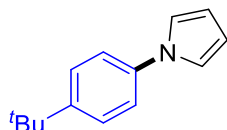

Following the general procedure, the title compound was isolated by Flash column chromatography (PE) as a white crystal in 92% (55.0 mg) yield. The spectral data were in accordance with those reported in the literature.<sup>3</sup> **<sup>1</sup>H NMR** (600 MHz, CDCl<sub>3</sub>) δ 7.48 – 7.45 (m, 2H), 7.37 – 7.34 (m, 2H), 7.10 (m, 2H), 6.37 (m, 2H), 1.38 (s, 9H). **<sup>13</sup>C NMR** (151 MHz, CDCl<sub>3</sub>) δ 148.6, 138.3, 126.3, 120.2, 119.4, 110.0, 34.4, 31.4.

**1-(4-(trimethylsilyl)phenyl)-1*H*-pyrrole (3e)**

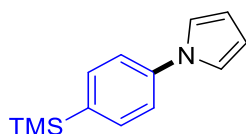

Following the general procedure, the title compound was isolated by Flash column chromatography (PE) as a light white crystal in 98% (63.2 mg) yield. **<sup>1</sup>H NMR** (600 MHz, CDCl<sub>3</sub>) δ 7.64 – 7.61 (m, 2H), 7.45 – 7.43 (m, 2H), 7.17 (m, 2H), 6.41 (m, 2H), 0.36 (s, 9H). **<sup>13</sup>C NMR** (151 MHz, CDCl<sub>3</sub>) δ 141.1, 137.5, 134.6, 119.7, 119.1, 110.4, 1.1. **HRMS** (ESI) *m/z*: [M+H]<sup>+</sup> calcd for (C<sub>13</sub>H<sub>18</sub>NSi)<sup>+</sup>, 216.1203; found: 216.1190. **m.p.** = 58.6–58.9 °C.

**1-(4-(methylthio)phenyl)-1*H*-pyrrole (3f)**

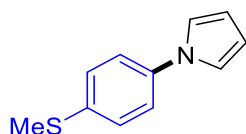

Following the general procedure, the title compound was isolated by Flash column chromatography (PE:EtOAc = 200:1) as a white solid in 90% (51.0 mg) yield. The spectral data were in accordance with those reported in the literature.<sup>4</sup> **<sup>1</sup>H NMR** (600 MHz, CDCl<sub>3</sub>) δ 7.33 (s, 4H), 7.07 (m, 2H), 6.36 (m, 2H), 2.52 (s, 3H). **<sup>13</sup>C NMR** (151 MHz, CDCl<sub>3</sub>) δ 138.3, 135.4, 128.1, 121.0, 119.2, 110.4, 16.4.

**1-(4-(trifluoromethyl)phenyl)-1H-pyrrole (3g)**

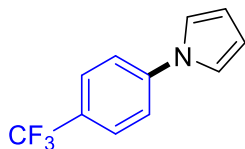

Following the general procedure, the title compound was isolated by Flash column chromatography (PE:EtOAc = 200:1) as a white crystal in 81% (51.3 mg) yield. The spectral data were in accordance with those reported in the literature.<sup>2</sup> **<sup>1</sup>H NMR** (600 MHz, CDCl<sub>3</sub>) δ 7.70 (d, *J* = 8.4 Hz, 2H), 7.50 (d, *J* = 8.5 Hz, 2H), 7.17 – 7.15 (m, 2H), 6.44 – 6.42 (m, 2H). **<sup>13</sup>C NMR** (151 MHz, CDCl<sub>3</sub>) δ 143.2, 127.4 (q, *J*<sub>C-F</sub> = 32.9 Hz), 126.8 (q, *J*<sub>C-F</sub> = 3.8 Hz), 124.0 (q, *J*<sub>C-F</sub> = 271.7 Hz) 119.9, 119.0, 111.5. **<sup>19</sup>F NMR** (565 MHz, CDCl<sub>3</sub>) δ -62.17.

**(4-(1H-pyrrol-1-yl)phenyl)(phenyl)methanone (3h)**

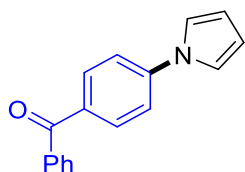

Following the general procedure, the title compound was isolated by Flash column chromatography (PE:EtOAc = 100:1) as a white solid in 87% (64.5 mg) yield. **<sup>1</sup>H NMR** (600 MHz, CDCl<sub>3</sub>) δ 7.93 – 7.89 (m, 2H), 7.81 (dd, *J* = 10.4, 9.1 Hz, 2H), 7.61 (t, *J* = 7.4 Hz, 1H), 7.53 – 7.48 (m, 4H), 7.21 – 7.18 (m, 2H), 6.44 – 6.39 (m, 2H). **<sup>13</sup>C NMR** (151 MHz, CDCl<sub>3</sub>) δ 195.3, 143.6, 137.6, 134.1, 132.3, 131.9, 129.8, 128.3, 119.1, 119.0, 111.5. **HRMS** (ESI) *m/z*: [M+H]<sup>+</sup> calcd for (C<sub>17</sub>H<sub>14</sub>NO)<sup>+</sup>, 248.1070; found: 248.1051. **m.p.** = 153.8-154.6 °C.

**4-(1H-pyrrol-1-yl)benzonitrile (3i)**

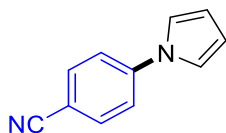

Following the general procedure, the title compound was isolated by Flash column chromatography (PE:EtOAc = 50:1) as a white crystal in 90% (45.4 mg) yield. **<sup>1</sup>H NMR** (600 MHz, CDCl<sub>3</sub>) δ 7.73 – 7.70 (m, 2H), 7.50 – 7.46 (m, 2H), 7.16 – 7.12 (m, 2H), 6.42 – 6.39 (m, 2H). **<sup>13</sup>C NMR** (151 MHz, CDCl<sub>3</sub>) δ 143.6, 133.7, 119.9, 118.8, 118.4, 112.1, 108.5. **HRMS** (ESI) *m/z*: [M+H]<sup>+</sup> calcd for (C<sub>11</sub>H<sub>9</sub>N<sub>2</sub>)<sup>+</sup>, 169.0760; found: 169.0753. **m.p.** = 102.0-102.5 °C.

**1-(4-(trifluoromethoxy)phenyl)-1H-pyrrole (3j)**



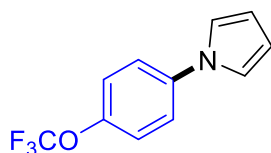

Following the general procedure, the title compound was isolated by Flash column chromatography (PE:EtOAc = 200:1) as a white solid in 71% (48.4 mg) yield. **<sup>1</sup>H NMR** (600 MHz, CDCl<sub>3</sub>) δ 7.44 – 7.41 (m, 2H), 7.31 (d, *J* = 8.5 Hz, 2H), 7.10 – 7.07 (m, 2H), 6.43 – 6.40 (m, 2H). **<sup>13</sup>C NMR** (151 MHz, CDCl<sub>3</sub>) δ 146.6, 139.3, 122.2, 121.5, 120.5 (q, *J*<sub>C-F</sub> = 257.2 Hz), 119.3, 110.9. **<sup>19</sup>F NMR** (565 MHz, CDCl<sub>3</sub>) δ -58.10. **HRMS** (ESI) *m/z*: [M+H]<sup>+</sup> calcd for (C<sub>11</sub>H<sub>9</sub>F<sub>4</sub>NO)<sup>+</sup>, 228.0631; found: 228.0619. **m.p.** = 59.1-59.7 °C.

#### 1-(4-chlorophenyl)-1H-pyrrole (3k)

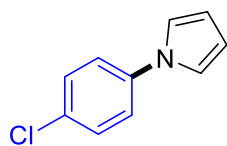

Following the general procedure, the title compound was isolated by Flash column chromatography (PE:EtOAc = 200:1) as a white crystal in 53% (28.3 mg) yield. The spectral data were in accordance with those reported in the literature.<sup>3</sup> **<sup>1</sup>H NMR** (600 MHz, CDCl<sub>3</sub>) δ 7.41 – 7.38 (m, 2H), 7.35 – 7.32 (m, 2H), 7.06 (m, 2H), 6.37 (m, 2H). **<sup>13</sup>C NMR** (151 MHz, CDCl<sub>3</sub>) δ 139.3, 131.0, 129.6, 121.6, 119.2, 110.8.

#### 4-(1H-pyrrol-1-yl)phenyl trifluoromethanesulfonate (3l)

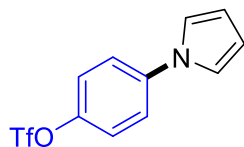

Following the general procedure, the title compound was isolated by Flash column chromatography (PE:EtOAc = 200:1) as a yellow oil in 73% (63.7 mg) yield. **<sup>1</sup>H NMR** (600 MHz, CDCl<sub>3</sub>) δ 7.47 – 7.44 (m, 2H), 7.37 – 7.34 (m, 2H), 7.09 – 7.06 (m, 2H), 6.41 – 6.38 (m, 2H). **<sup>13</sup>C NMR** (151 MHz, CDCl<sub>3</sub>) δ 146.6, 140.5, 122.6, 121.6, 119.3, 118.7 (q, *J*<sub>C-F</sub> = 320.9 Hz), 111.4. **<sup>19</sup>F NMR** (565 MHz, CDCl<sub>3</sub>) δ -72.70. **HRMS** (ESI) *m/z*: [M+H]<sup>+</sup> calcd for (C<sub>11</sub>H<sub>9</sub>F<sub>3</sub>NO<sub>3</sub>S)<sup>+</sup>, 292.0250; found: 292.0238. **m.p.** = 128.6-128.8 °C.

#### 1-(4-(2-chloroethyl)phenyl)-1H-pyrrole (3m)

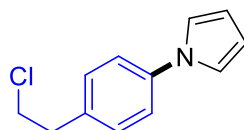

Following the general procedure, the title compound was isolated by Flash column chromatography (PE:EtOAc = 200:1) as a white solid in 92% (56.6 mg) yield. **<sup>1</sup>H NMR** (600 MHz, CDCl<sub>3</sub>) δ 7.39 – 7.37 (m, 2H), 7.30 (d, *J* = 8.4 Hz, 2H), 7.12 (m, 2H), 6.39 (m, 2H), 3.76 (t, *J* = 7.3 Hz, 2H), 3.12 (t, *J* = 7.3 Hz, 2H). **<sup>13</sup>C NMR** (151 MHz, CDCl<sub>3</sub>) δ 139.5, 135.4, 129.9, 120.5, 119.2, 110.3, 44.8, 38.4. **HRMS** (ESI) *m/z*: [M+H]<sup>+</sup> calcd for (C<sub>12</sub>H<sub>13</sub>ClN)<sup>+</sup>, 206.0731; found: 206.0722. **m.p.** = 86.4-86.9 °C.

**1-(*m*-tolyl)-1*H*-pyrrole (3n)**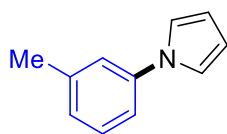

Following the general procedure, the title compound was isolated by Flash column chromatography (PE) as a yellow oil in 74% (34.9 mg) yield. The spectral data were in accordance with those reported in the literature.<sup>2</sup> **<sup>1</sup>H NMR** (600 MHz, CDCl<sub>3</sub>) δ 7.35 (t, *J* = 7.7 Hz, 1H), 7.26 (d, *J* = 2.0 Hz, 1H), 7.25 (d, *J* = 7.9 Hz, 1H), 7.13 (t, *J* = 2.1 Hz, 2H), 7.11 (m, 2H), 6.40 (m, 2H), 2.45 (s, 3H). **<sup>13</sup>C NMR** (151 MHz, CDCl<sub>3</sub>) δ 140.7, 139.5, 129.3, 126.3, 121.2, 119.3, 117.6, 110.2, 21.4.

***N,N*-dimethyl-3-(1*H*-pyrrol-1-yl)aniline (3o)**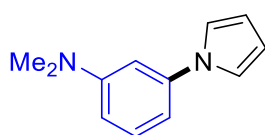

Following the general procedure, the title compound was isolated by Flash column chromatography (PE:EtOAc = 100:1) as a white solid in 83% (46.3 mg) yield. **<sup>1</sup>H NMR** (600 MHz, CDCl<sub>3</sub>) δ 7.29 (t, *J* = 8.1 Hz, 1H), 7.12 (m, 2H), 6.77 (dd, *J* = 7.8, 1.5 Hz, 1H), 6.74 (t, *J* = 2.2 Hz, 1H), 6.65 (dd, *J* = 8.3, 2.3 Hz, 1H), 6.37 (m, 2H), 3.02 (s, 6H). **<sup>13</sup>C NMR** (151 MHz, CDCl<sub>3</sub>) δ 151.4, 141.8, 129.9, 119.6, 109.9, 109.8, 109.0, 105.0, 40.5. **HRMS** (ESI) *m/z*: [M+H]<sup>+</sup> calcd for (C<sub>12</sub>H<sub>15</sub>N<sub>2</sub>)<sup>+</sup>, 187.1230; found: 187.1221. **m.p.** = 135.6-135.9 °C.

***N*-(3-(1*H*-pyrrol-1-yl)phenyl)acetamide (3p)**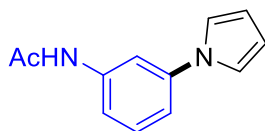

Following the general procedure, the title compound was isolated by Flash column chromatography (PE:EtOAc = 100:1) as a yellow solid in 68% (40.8 mg) yield. **<sup>1</sup>H NMR** (600 MHz, DMSO-*d*<sub>6</sub>) δ 10.09 (s, 1H), 7.83 (s, 1H), 7.41 (d, *J* = 8.0 Hz, 1H), 7.36 (t, *J* = 8.0 Hz, 1H), 7.23 (m, 2H), 7.21 (d, *J* = 7.9 Hz, 1H), 6.27 (m, 2H), 2.07 (s, 3H). **<sup>13</sup>C NMR** (151 MHz, DMSO-*d*<sub>6</sub>) δ 169.1, 141.0, 140.7, 130.4, 119.4, 116.4, 114.7, 111.0, 110.6, 24.6. **HRMS** (ESI) *m/z*: [M+H]<sup>+</sup> calcd for (C<sub>12</sub>H<sub>13</sub>N<sub>2</sub>O)<sup>+</sup>, 201.1022; found: 201.1012. **m.p.** = 110.8-111.9 °C.

**1-(3-fluorophenyl)-1*H*-pyrrole (3q)**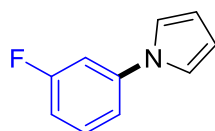

Following the general procedure, the title compound was isolated by Flash column chromatography (PE:EtOAc = 200:1) as a yellow oil in 60% (29.0 mg) yield. The spectral data were in accordance with those reported in the literature.<sup>5</sup> **<sup>1</sup>H NMR** (600 MHz, CDCl<sub>3</sub>) δ 7.40 (td, *J* = 8.2, 6.4 Hz, 1H), 7.21 (dd, *J* = 8.1, 1.6 Hz, 1H), 7.14 (dt, *J* = 10.1, 2.3 Hz, 1H), 7.12 – 7.11 (m, 2H), 6.97 (tdd, *J* = 8.3, 2.4, 0.5 Hz,

1H), 6.41 – 6.39 (m, 2H). <sup>13</sup>C NMR (151 MHz, CDCl<sub>3</sub>) δ 163.3 (d, *J*<sub>C-F</sub> = 246.5 Hz), 142.1 (d, *J*<sub>C-F</sub> = 10.0 Hz), 130.8 (d, *J*<sub>C-F</sub> = 9.4 Hz), 119.1, 115.7 (d, *J*<sub>C-F</sub> = 2.9 Hz), 112.2 (d, *J*<sub>C-F</sub> = 21.2 Hz), 110.9, 107.7 (d, *J*<sub>C-F</sub> = 25.0 Hz). <sup>19</sup>F NMR (565 MHz, CDCl<sub>3</sub>) δ -111.14.

#### 1-(3-(trifluoromethyl)phenyl)-1*H*-pyrrole (3r)

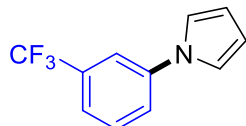

Following the general procedure, the title compound was isolated by Flash column chromatography (PE:EtOAc = 200:1) as a yellow oil in 60% (38.0 mg) yield. The spectral data were in accordance with those reported in the literature.<sup>6</sup> <sup>1</sup>H NMR (600 MHz, CDCl<sub>3</sub>) δ 7.68 (s, 1H), 7.60 (dd, *J* = 8.0, 1.7 Hz, 1H), 7.57 (t, *J* = 7.7 Hz, 1H), 7.53 (dd, *J* = 10.2, 2.8 Hz, 1H), 7.17 – 7.14 (m, 2H), 6.45 – 6.42 (m, 2H). 123.70 (q, *J* = 272.5 Hz). <sup>13</sup>C NMR (151 MHz, CDCl<sub>3</sub>) δ 141.1, 132.1 (q, *J*<sub>C-F</sub> = 32.7 Hz), 130.2, 123.7 (q, *J*<sub>C-F</sub> = 272.5 Hz), 123.3 (d, *J*<sub>C-F</sub> = 0.8 Hz), 122.1 (q, *J*<sub>C-F</sub> = 3.7 Hz), 119.2, 117.1 (q, *J*<sub>C-F</sub> = 3.9 Hz), 111.3. <sup>19</sup>F NMR (565 MHz, CDCl<sub>3</sub>) δ -62.81.

#### 1-(*o*-tolyl)-1*H*-pyrrole (3s)

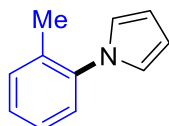

Following the general procedure, the title compound was isolated by Flash column chromatography (PE) as a yellow oil in 55% (25.9 mg) yield. The spectral data were in accordance with those reported in the literature.<sup>2</sup> <sup>1</sup>H NMR (600 MHz, CDCl<sub>3</sub>) δ 7.33 – 7.27 (m, 4H), 6.82 (m, 2H), 6.35 (m, 2H), 2.24 (s, 3H). <sup>13</sup>C NMR (151 MHz, CDCl<sub>3</sub>) δ 140.6, 133.8, 131.0, 127.4, 126.6, 126.5, 122.0, 108.7, 17.8.

#### 1-(naphthalen-2-yl)-1*H*-pyrrole (3t)

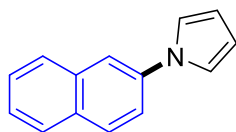

Following the general procedure, the title compound was isolated by Flash column chromatography (PE) as a white solid in 75% (43.5 mg) yield. The spectral data were in accordance with those reported in the literature.<sup>3</sup> <sup>1</sup>H NMR (600 MHz, CDCl<sub>3</sub>) δ 7.93 (d, *J* = 8.8 Hz, 1H), 7.90 – 7.87 (m, 2H), 7.83 (d, *J* = 2.1 Hz, 1H), 7.62 (dd, *J* = 8.8, 2.3 Hz, 1H), 7.56 (ddd, *J* = 8.2, 6.9, 1.1 Hz, 1H), 7.51 (ddd, *J* = 8.0, 6.9, 1.1 Hz, 1H), 7.28 – 7.26 (m, 2H), 6.48 – 6.45 (m, 2H). <sup>13</sup>C NMR (151 MHz, CDCl<sub>3</sub>) δ 138.1, 133.8, 131.4, 129.5, 127.7, 127.6, 126.9, 125.5, 120.1, 119.5, 117.4, 110.6.

#### 1-(3,5-dimethylphenyl)-1*H*-pyrrole (3u)

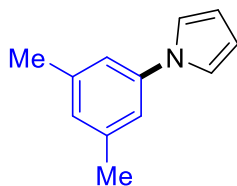

Following the general procedure, the title compound was isolated by Flash column chromatography (PE) as a yellow oil in 81% (41.6 mg) yield. The spectral data were in accordance with those reported in the literature.<sup>2</sup> **<sup>1</sup>H NMR** (600 MHz, CDCl<sub>3</sub>) δ 7.10 – 7.08 (m, 2H), 7.04 (s, 2H), 6.91 (d, *J* = 0.5 Hz, 1H), 6.36 – 6.34 (m, 2H), 2.38 (s, 6H). **<sup>13</sup>C NMR** (151 MHz, CDCl<sub>3</sub>) δ 140.7, 139.2, 127.3, 119.3, 118.5, 110.0, 21.3.

### 2-(1*H*-pyrrol-1-yl)pyridine (3x)

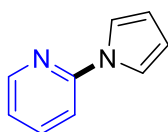

Following the general procedure, the title compound was isolated by Flash column chromatography (PE) as a yellow oil in 87% (37.6 mg) yield. The spectral data were in accordance with those reported in the literature.<sup>7</sup> **<sup>1</sup>H NMR** (600 MHz, CDCl<sub>3</sub>) δ 8.47 – 8.39 (m, 1H), 7.72 (ddd, *J* = 8.3, 7.4, 1.9 Hz, 1H), 7.55 – 7.52 (m, 2H), 7.31 (d, *J* = 8.3 Hz, 1H), 7.09 (ddd, *J* = 7.3, 4.9, 0.8 Hz, 1H), 6.40 – 6.36 (m, 2H). **<sup>13</sup>C NMR** (151 MHz, CDCl<sub>3</sub>) δ 151.3, 148.6, 138.4, 120.1, 118.0, 111.3, 111.2.

### 5-(1*H*-pyrrol-1-yl)-2-(trifluoromethyl)pyridine (3y)

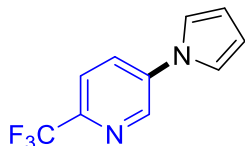

Following the general procedure, the title compound was isolated by Flash column chromatography (PE:EtOAc = 100:1) as a white crystal in 52% (33.1 mg) yield. **<sup>1</sup>H NMR** (600 MHz, CDCl<sub>3</sub>) δ 8.83 (d, *J* = 2.5 Hz, 1H), 7.83 (dd, *J* = 8.5, 2.5 Hz, 1H), 7.75 (d, *J* = 8.5 Hz, 1H), 7.17 – 7.14 (m, 2H), 6.47 – 6.41 (m, 2H). **<sup>13</sup>C NMR** (151 MHz, CDCl<sub>3</sub>) δ 144.6 (q, *J*<sub>C-F</sub> = 35.4 Hz), 141.4, 138.8, 127.4, 121.4 (q, *J*<sub>C-F</sub> = 273.5 Hz), 121.3 (q, *J*<sub>C-F</sub> = 2.6 Hz), 118.9, 112.5. **<sup>19</sup>F NMR** (565 MHz, CDCl<sub>3</sub>) δ -67.41. **HRMS** (ESI) *m/z*: [M+H]<sup>+</sup> calcd for (C<sub>10</sub>H<sub>8</sub>F<sub>3</sub>N<sub>2</sub>)<sup>+</sup>, 213.0634; found: 213.0623. **m.p.** = 94.2-95.0 °C.

### 2-(1*H*-pyrrol-1-yl)quinoxaline (3z)

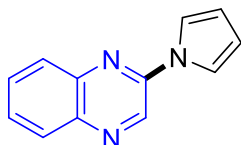

Following the general procedure, the title compound was isolated by Flash column chromatography (PE:EtOAc = 100:1) as a white solid in 86% (50.4 mg) yield. **<sup>1</sup>H NMR** (600 MHz, CDCl<sub>3</sub>) δ 9.03 (s, 1H), 8.06 (dd, *J* = 8.3, 1.1 Hz, 1H), 7.97 (dd, *J* = 8.4, 0.9 Hz, 1H), 7.74 (ddd, *J* = 8.3, 7.0, 1.4 Hz, 1H), 7.72 – 7.70 (m, 2H), 7.65 (ddd, *J* = 8.3, 7.0, 1.4 Hz, 1H), 6.47 – 6.45 (m, 2H). **<sup>13</sup>C NMR** (151 MHz,

CDCl<sub>3</sub>)  $\delta$  144.8, 140.7, 140.4, 136.5, 130.9, 129.0, 128.3, 118.3, 112.7. **HRMS** (ESI)  $m/z$ : [M+H]<sup>+</sup> calcd for (C<sub>12</sub>H<sub>10</sub>N<sub>3</sub>)<sup>+</sup>, 196.0869; found: 196.0860. **m.p.** = 109.3-110.1 °C.

**5-(1*H*-pyrrol-1-yl)benzo[*c*][1,2,5]thiadiazole (3aa)**

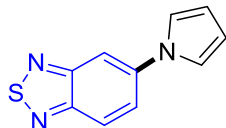

Following the general procedure, the title compound was isolated by Flash column chromatography (PE:EtOAc = 100:1) as a white crystal in 83% (50.1 mg) yield. **<sup>1</sup>H NMR** (600 MHz, CDCl<sub>3</sub>)  $\delta$  8.05 (d,  $J$  = 9.4 Hz, 1H), 7.91 (d,  $J$  = 1.9 Hz, 1H), 7.77 (dd,  $J$  = 9.4, 2.2 Hz, 1H), 7.24 – 7.21 (m, 2H), 6.46 – 6.42 (m, 2H). **<sup>13</sup>C NMR** (151 MHz, CDCl<sub>3</sub>)  $\delta$  155.2, 152.8, 141.4, 124.6, 122.3, 119.5, 111.8, 109.5. **HRMS** (ESI)  $m/z$ : [M+H]<sup>+</sup> calcd for (C<sub>10</sub>H<sub>8</sub>N<sub>3</sub>S)<sup>+</sup>, 202.0433; found: 202.0424. **m.p.** = 141.0-142.1 °C.

**2-methyl-5-(1*H*-pyrrol-1-yl)benzo[*d*]thiazole (3ab).**

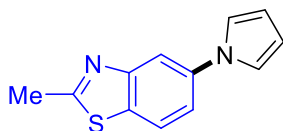

Following the general procedure, the title compound was isolated by Flash column chromatography (PE:EtOAc = 200:1) as a white crystal in 55 % (35.4 mg) yield. **<sup>1</sup>H NMR** (600 MHz, CDCl<sub>3</sub>)  $\delta$  7.96 (d,  $J$  = 2.1 Hz, 1H), 7.82 (d,  $J$  = 8.5 Hz, 1H), 7.42 (dd,  $J$  = 8.5, 2.2 Hz, 1H), 7.15 (m, 2H), 6.39 (m, 2H), 2.85 (s, 3H). **<sup>13</sup>C NMR** (151 MHz, CDCl<sub>3</sub>)  $\delta$  169.0, 154.2, 139.4, 132.6, 122.0, 119.6, 118.1, 113.9, 110.6, 20.2. **HRMS** (ESI)  $m/z$ : [M+H]<sup>+</sup> calcd for (C<sub>12</sub>H<sub>11</sub>N<sub>2</sub>S)<sup>+</sup>, 215.0637; found: 215.0627. **m.p.** = 139.6-140.2 °C.

**1-phenyl-1*H*-indole (4a)**

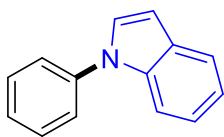

Following the general procedure, the title compound was isolated by Flash column chromatography (PE:EtOAc = 100:1) as a yellow oil in 81% (46.9 mg) yield. The spectral data were in accordance with those reported in the literature.<sup>8</sup> **<sup>1</sup>H NMR** (600 MHz, CDCl<sub>3</sub>)  $\delta$  7.80 (d,  $J$  = 7.7 Hz, 1H), 7.68 – 7.65 (m, 1H), 7.58 (dd,  $J$  = 3.3, 1.7 Hz, 4H), 7.45 – 7.40 (m, 2H), 7.34 – 7.26 (m, 2H), 6.78 (d,  $J$  = 2.2 Hz, 1H). **<sup>13</sup>C NMR** (151 MHz, CDCl<sub>3</sub>)  $\delta$  139.8, 135.8, 129.5, 129.3, 127.9, 126.4, 124.3, 122.3, 121.1, 120.3, 110.5, 103.5.

**5-methoxy-1-phenyl-1*H*-indole (4b)**

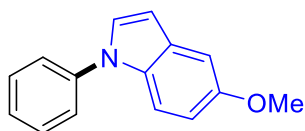

Following the general procedure, the title compound was isolated by Flash column chromatography (PE:EtOAc = 100:1) as a yellow oil in 91% (60.9 mg) yield. The spectral data were in accordance with those reported in the literature.<sup>8</sup> **<sup>1</sup>H NMR** (600 MHz, CDCl<sub>3</sub>) δ 7.55 – 7.50 (m, 5H), 7.39 – 7.35 (m, 2H), 7.20 (d, *J* = 2.5 Hz, 1H), 6.95 (dd, *J* = 8.9, 2.5 Hz, 1H), 6.66 (dd, *J* = 3.2, 0.6 Hz, 1H), 3.92 (s, 3H). **<sup>13</sup>C NMR** (151 MHz, CDCl<sub>3</sub>) δ 154.5, 139.9, 131.0, 129.8, 129.5, 128.3, 126.2, 123.9, 112.4, 111.3, 103.2, 102.7, 55.8.

#### 5-fluoro-1-phenyl-1H-indole (4c)

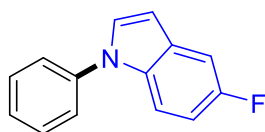

Following the general procedure, the title compound was isolated by Flash column chromatography (PE:EtOAc = 100:1) as a yellow oil in 90% (57.0 mg) yield. The spectral data were in accordance with those reported in the literature.<sup>8</sup> **<sup>1</sup>H NMR** (600 MHz, CDCl<sub>3</sub>) δ 7.56 – 7.52 (m, 2H), 7.52 – 7.47 (m, 3H), 7.45 – 7.38 (m, 2H), 7.37 (dd, *J* = 9.4, 2.5 Hz, 1H), 7.00 (td, *J* = 9.1, 2.5 Hz, 1H), 6.67 (dd, *J* = 3.1, 0.4 Hz, 1H). **<sup>13</sup>C NMR** (151 MHz, CDCl<sub>3</sub>) δ 158.1 (d, *J*<sub>C-F</sub> = 235.6 Hz), 139.6, 132.5, 129.6, 129.6 (d, *J*<sub>C-F</sub> = 10.0 Hz), 129.4, 126.6, 124.2, 111.2 (d, *J*<sub>C-F</sub> = 9.7 Hz), 110.6 (d, *J*<sub>C-F</sub> = 26.1 Hz), 105.8 (d, *J*<sub>C-F</sub> = 23.5 Hz), 103.4 (d, *J*<sub>C-F</sub> = 4.5 Hz). **<sup>19</sup>F NMR** (565 MHz, CDCl<sub>3</sub>) δ -124.12.

#### 4-methoxy-1-phenyl-1H-indole (4d)

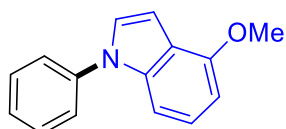

Following the general procedure, the title compound was isolated by Flash column chromatography (PE:EtOAc = 50:1) as a white solid in 87% (58.2 mg) yield. The spectral data were in accordance with those reported in the literature.<sup>9</sup> **<sup>1</sup>H NMR** (600 MHz, CDCl<sub>3</sub>) δ 7.55 – 7.53 (m, 4H), 7.39 (ddd, *J* = 8.6, 5.1, 3.6 Hz, 1H), 7.29 (d, *J* = 3.3 Hz, 1H), 7.24 (d, *J* = 8.3 Hz, 1H), 7.19 (t, *J* = 7.9 Hz, 1H), 6.85 (d, *J* = 3.2 Hz, 1H), 6.64 (d, *J* = 7.6 Hz, 1H), 4.03 (s, 3H). **<sup>13</sup>C NMR** (151 MHz, CDCl<sub>3</sub>) δ 153.4, 139.9, 137.2, 129.5, 126.5, 126.4, 124.3, 123.1, 119.8, 103.9, 100.8, 100.2, 55.4.

#### 4-(benzyloxy)-1-phenyl-1H-indole (4e)

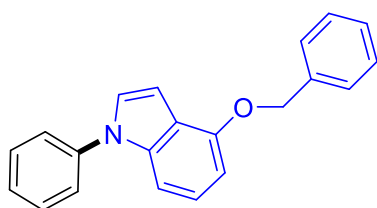

Following the general procedure, the title compound was isolated by Flash column chromatography (PE:EtOAc = 50:1) as a white solid in 85% (76.3 mg) yield. **<sup>1</sup>H NMR** (600 MHz, CDCl<sub>3</sub>) δ 7.60 (d, *J* = 7.4 Hz, 2H), 7.57 – 7.54 (m, 4H), 7.47 (t, *J* = 7.6 Hz, 2H), 7.40 (ddd, *J* = 8.0, 5.6, 2.6 Hz, 2H), 7.32 (d, *J* = 3.2 Hz, 1H), 7.27 (d, *J* = 8.1 Hz, 1H), 7.19 (t, *J* = 8.0 Hz, 1H), 6.96 – 6.92 (m, 1H), 6.71 (d, *J* = 7.7 Hz, 1H), 5.32 (s, 2H). **<sup>13</sup>C NMR** (151 MHz, CDCl<sub>3</sub>) δ 152.6, 139.9, 137.5, 137.3, 129.5, 128.5, 127.7, 127.3, 126.5, 126.4, 124.3, 123.1, 120.2, 104.1, 101.7, 101.0, 70.0. **HRMS** (ESI) *m/z*: [M+H]<sup>+</sup> calcd for (C<sub>21</sub>H<sub>18</sub>NO)<sup>+</sup>, 300.1388; found: 300.1367. **m.p.** = 77.3-78.1 °C.

#### methyl 1-phenyl-1*H*-indole-4-carboxylate (4f)

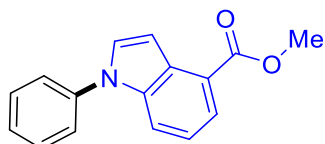

Following the general procedure, the title compound was isolated by Flash column chromatography (PE:EtOAc = 100:1) as a white crystal in 30% (22.6 mg) yield; **<sup>1</sup>H NMR** (600 MHz, CDCl<sub>3</sub>) δ 7.98 (dd, *J* = 7.5, 0.7 Hz, 1H), 7.73 (d, *J* = 8.2 Hz, 1H), 7.56 – 7.52 (m, 2H), 7.50 – 7.47 (m, 3H), 7.42 – 7.38 (m, 1H), 7.36 (dd, *J* = 3.2, 0.5 Hz, 1H), 7.27 (dd, *J* = 9.8, 5.9 Hz, 1H), 4.03 (s, 3H). **<sup>13</sup>C NMR** (151 MHz, CDCl<sub>3</sub>) δ 167.8, 139.2, 136.7, 130.0, 129.6, 128.7, 126.9, 124.7, 123.8, 121.8, 121.5, 115.3, 104.5, 51.7. **HRMS** (ESI) *m/z*: [M+H]<sup>+</sup> calcd for (C<sub>16</sub>H<sub>14</sub>NO<sub>2</sub>)<sup>+</sup>, 252.1019; found: 252.1007. **m.p.** = 87.7-88.6 °C.

#### 3-methyl-1-phenyl-1*H*-indole (4g)

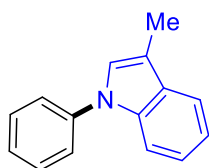

Following the general procedure, the title compound was isolated by Flash column chromatography (PE:EtOAc = 50:1) as a yellow solid in 86% (53.4 mg) yield. The spectral data were in accordance with those reported in the literature.<sup>9</sup> **<sup>1</sup>H NMR** (600 MHz, CDCl<sub>3</sub>) δ 7.71 (d, *J* = 7.7 Hz, 1H), 7.64 (d, *J* = 8.1 Hz, 1H), 7.56 – 7.54 (m, 4H), 7.39 – 7.36 (m, 1H), 7.32 – 7.29 (m, 1H), 7.27 – 7.25 (m, 1H), 7.20 (d, *J* = 0.9 Hz, 1H), 2.47 (d, *J* = 1.1 Hz, 3H). **<sup>13</sup>C NMR** (151 MHz, CDCl<sub>3</sub>) δ 140.0, 135.9, 129.7, 129.5, 125.9, 125.4, 123.9, 122.3, 119.7, 119.2, 112.8, 110.3, 9.6.

#### 2-methyl-1-phenyl-1*H*-indole (4h)

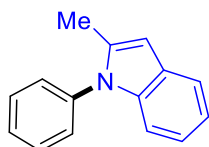

Following the general procedure, the title compound was isolated by Flash column chromatography (PE:EtOAc = 30:1) as a yellow oil in 62% (38.5 mg) yield. The spectral data were in accordance with those reported in the literature.<sup>9</sup> **<sup>1</sup>H NMR** (600 MHz, CDCl<sub>3</sub>) δ 7.64 – 7.59 (m, 1H), 7.56 (dt, *J* = 9.9, 1.9 Hz, 2H), 7.50 – 7.45 (m, 1H), 7.39 (dt, *J* = 8.4, 1.8 Hz, 2H), 7.19 – 7.08 (m, 3H), 6.44 (s, 1H), 2.34 (d, *J*

= 0.8 Hz, 3H). **<sup>13</sup>C NMR** (151 MHz, CDCl<sub>3</sub>) δ 138.1, 137.9, 137.0, 129.4, 128.2, 128.0, 127.7, 121.0, 120.0, 119.5, 110.0, 101.3, 13.4.

#### 1,2-diphenyl-1*H*-indole (4i)

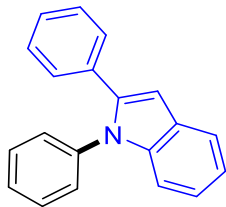

Following the general procedure, the title compound was isolated by Flash column chromatography (PE:EtOAc = 30:1) as a white solid in 40% (32.3 mg) yield. The spectral data were in accordance with those reported in the literature.<sup>10</sup> **<sup>1</sup>H NMR** (600 MHz, CDCl<sub>3</sub>) δ 7.75 – 7.71 (m, 1H), 7.44 (dt, *J* = 10.0, 1.9 Hz, 2H), 7.39 – 7.36 (m, 1H), 7.34 (dd, *J* = 6.0, 3.3 Hz, 1H), 7.33 – 7.30 (m, 3H), 7.29 – 7.28 (m, 2H), 7.28 – 7.24 (m, 2H), 7.24 – 7.20 (m, 2H), 6.85 (d, *J* = 0.5 Hz, 1H). **<sup>13</sup>C NMR** (151 MHz, CDCl<sub>3</sub>) δ 140.7, 140.0, 138.5, 132.5, 129.2, 128.9, 128.2, 128.1, 128.0, 127.3, 127.2, 122.3, 120.7, 120.6, 110.7, 103.7.

#### 2,3-dimethyl-1-phenyl-1*H*-indole (4j)

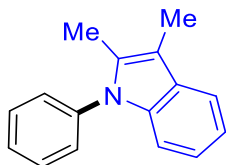

Following the general procedure, the title compound was isolated by Flash column chromatography (PE:EtOAc = 30:1) as a white solid in 81% (53.7 mg) yield. The spectral data were in accordance with those reported in the literature.<sup>11</sup> **<sup>1</sup>H NMR** (600 MHz, CDCl<sub>3</sub>) δ 7.59 (d, *J* = 7.6 Hz, 1H), 7.57 – 7.54 (m, 2H), 7.48 – 7.44 (m, 1H), 7.40 – 7.36 (m, 2H), 7.19 – 7.12 (m, 3H), 2.37 (s, 3H), 2.28 (s, 3H). **<sup>13</sup>C NMR** (151 MHz, CDCl<sub>3</sub>) δ 138.3, 137.2, 132.6, 129.3, 128.8, 128.0, 127.3, 121.1, 119.4, 117.8, 109.7, 107.9, 10.9, 8.9.

#### 2-methyl-1-phenyl-1*H*-pyrrole (4k)

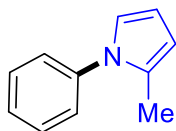

Following the general procedure, the title compound was isolated by Flash column chromatography (PE:EtOAc = 200:1) as a yellow solid in 53% (25.0 mg) yield. **<sup>1</sup>H NMR** (600 MHz, CDCl<sub>3</sub>) δ 7.51 – 7.44 (m, 2H), 7.40 – 7.31 (m, 3H), 6.87 – 6.75 (m, 1H), 6.24 (t, *J* = 3.1 Hz, 1H), 6.13 – 6.05 (m, 1H), 2.26 (s, 3H). **<sup>13</sup>C NMR** (151 MHz, CDCl<sub>3</sub>) δ 140.4, 129.0, 128.9, 126.8, 125.7, 121.3, 108.1, 108.0, 12.9. **HRMS** (ESI) *m/z*: [M+H]<sup>+</sup> calcd for (C<sub>11</sub>H<sub>12</sub>N)<sup>+</sup>, 158.0964; found: 158.0957. **m.p.** = 102.6–103.1 °C.

#### 9-phenyl-9*H*-carbazole (4l)



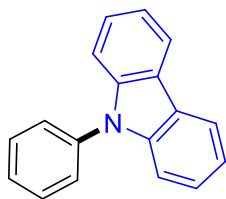

Following the general procedure, the title compound was isolated by Flash column chromatography (PE:EtOAc = 200:1) as a white crystal in 95% (69.3 mg) yield. The spectral data were in accordance with those reported in the literature.<sup>12</sup> **<sup>1</sup>H NMR** (600 MHz, CDCl<sub>3</sub>) δ 8.23 (d, *J* = 7.8 Hz, 2H), 7.68 – 7.61 (m, 4H), 7.54 – 7.46 (m, 5H), 7.37 (ddd, *J* = 7.9, 5.6, 2.5 Hz, 2H). **<sup>13</sup>C NMR** (151 MHz, CDCl<sub>3</sub>) δ 140.9, 137.7, 129.8, 127.4, 127.1, 125.9, 123.3, 120.3, 119.9, 109.7.

**10-phenyl-10H-phenoxazine (4m)**

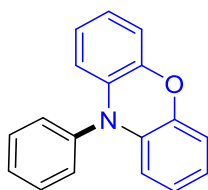

Following the general procedure, the title compound was isolated by Flash column chromatography (PE:EtOAc = 200:1) as a white crystal in 94% (73.1 mg) yield. The spectral data were in accordance with those reported in the literature.<sup>13</sup> **<sup>1</sup>H NMR** (600 MHz, CDCl<sub>3</sub>) δ 7.62 (dd, *J* = 10.9, 4.7 Hz, 2H), 7.51 – 7.47 (m, 1H), 7.37 (dd, *J* = 8.3, 1.1 Hz, 2H), 6.71 (dd, *J* = 7.8, 1.6 Hz, 2H), 6.65 (dd, *J* = 10.8, 4.4 Hz, 2H), 6.61 (td, *J* = 7.7, 1.5 Hz, 2H), 5.93 (dd, *J* = 7.9, 1.5 Hz, 2H). **<sup>13</sup>C NMR** (151 MHz, CDCl<sub>3</sub>) δ 143.9, 138.9, 134.4, 131.0, 130.8, 128.4, 123.2, 121.2, 115.4, 113.2.

**10-phenyl-10H-phenothiazine (4n)**

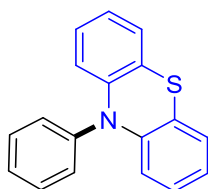

Following the general procedure, the title compound was isolated by Flash column chromatography (PE:EtOAc = 200:1) as a yellow solid in 98% (80.9 mg) yield; The spectral data were in accordance with those reported in the literature.<sup>13</sup> **<sup>1</sup>H NMR** (600 MHz, CDCl<sub>3</sub>) δ 7.65 – 7.61 (m, 2H), 7.51 (ddd, *J* = 4.7, 2.3, 1.1 Hz, 1H), 7.43 (dt, *J* = 8.4, 1.7 Hz, 2H), 7.06 (dd, *J* = 7.4, 1.7 Hz, 2H), 6.86 (dtd, *J* = 20.9, 7.3, 1.5 Hz, 4H), 6.25 (dd, *J* = 8.1, 1.4 Hz, 2H). **<sup>13</sup>C NMR** (151 MHz, CDCl<sub>3</sub>) δ 144.2, 140.9, 130.7, 128.1, 126.7, 122.4, 120.1, 116.0, 77.2, 76.8.

**isopropyl 2-(4-(4-(1H-pyrrol-1-yl)benzoyl)phenoxy)-2-methylpropanoate (5)**

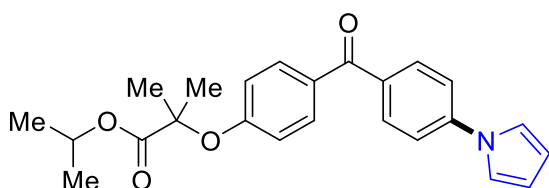

Following the general procedure, the title compound was isolated by Flash column chromatography (PE:EtOAc = 1:1) as a yellow solid in 88% (103.3 mg) yield; **<sup>1</sup>H NMR** (600 MHz, CDCl<sub>3</sub>) δ 7.83 (d, *J* = 8.5 Hz, 2H), 7.77 (t, *J* = 5.7 Hz, 2H), 7.49 – 7.43 (m, 2H), 7.18 – 7.14 (m, 2H), 6.92 – 6.86 (m, 2H), 6.39 – 6.33 (m, 2H), 5.13 – 5.06 (m, 1H), 1.67 (s, 6H), 1.21 (d, *J* = 6.3 Hz, 6H). **<sup>13</sup>C NMR** (151 MHz, CDCl<sub>3</sub>) δ 193.9, 172.9, 159.4, 143.1, 134.6, 131.7, 131.5, 130.5, 119.0, 118.9, 117.1, 111.3, 79.2, 69.1, 25.2, 21.4. **HRMS** (ESI) *m/z*: [M+H]<sup>+</sup> calcd for (C<sub>24</sub>H<sub>26</sub>NO<sub>4</sub>)<sup>+</sup>, 392.1856; found: 392.1836. **m.p.** = 107.0-108.8 °C.

**11-(4-methylpiperazin-1-yl)-8-(1*H*-pyrrol-1-yl)-5*H*-dibenzo[*b,e*][1,4]diazepine (6)**

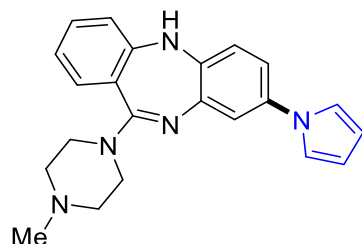

Following the general procedure, the title compound was isolated by Flash column chromatography (PE:EtOAc = 1:1) as a white solid in 70% (75.0 mg) yield; **<sup>1</sup>H NMR** (600 MHz, CDCl<sub>3</sub>) δ 7.30 (dd, *J* = 12.4, 4.5 Hz, 2H), 7.14 (d, *J* = 2.5 Hz, 1H), 7.02 (d, *J* = 7.3 Hz, 1H), 7.00 (m, 2H), 6.89 (dd, *J* = 8.3, 2.5 Hz, 1H), 6.84 (d, *J* = 7.7 Hz, 1H), 6.71 (d, *J* = 8.3 Hz, 1H), 6.28 (m, 2H), 4.99 (s, 1H), 3.50 (s, 4H), 2.53 (s, 4H), 2.35 (s, 3H). **<sup>13</sup>C NMR** (151 MHz, CDCl<sub>3</sub>) δ 162.8, 152.9, 141.4, 139.6, 137.6, 131.8, 130.3, 123.4, 122.9, 120.0, 119.7, 119.4, 119.3, 115.7, 109.7, 54.9, 46.0. **HRMS** (ESI) *m/z*: [M+H]<sup>+</sup> calcd for (C<sub>22</sub>H<sub>24</sub>N<sub>5</sub>)<sup>+</sup>, 358.2026; found: 358.2008. **m.p.** = 105.8-106.1 °C.

**(*Z*)-3-(2-(1*H*-pyrrol-1-yl)-9*H*-thioxanthen-9-ylidene)-*N,N*-dimethylpropan-1-amine (7)**

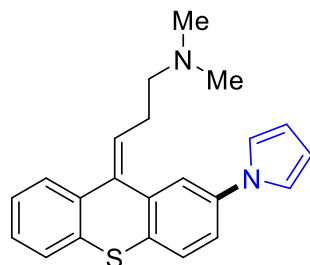

Following the general procedure, the title compound was isolated by Flash column chromatography (PE:EtOAc = 1:1) as a yellow solid in 86% (89.3 mg) yield; **<sup>1</sup>H NMR** (600 MHz, CDCl<sub>3</sub>) δ 7.51 (dd, *J* = 7.7, 1.2 Hz, 1H), 7.49 – 7.47 (m, 2H), 7.38 (dd, *J* = 7.7, 1.0 Hz, 1H), 7.29 – 7.26 (m, 2H), 7.24 – 7.22 (m, 1H), 7.10 (m, 2H), 6.37 (m, 2H), 5.99 (t, *J* = 7.3 Hz, 1H), 2.66 (q, *J* = 7.3 Hz, 2H), 2.49 (t, *J* = 7.3 Hz, 2H), 2.24 (s, 6H). **<sup>13</sup>C NMR** (151 MHz, CDCl<sub>3</sub>) δ 138.9, 138.1, 136.0, 135.0, 131.5, 130.8, 130.7, 127.6, 127.0, 126.9, 125.8, 125.7, 120.6, 119.4, 119.3, 59.5, 45.4, 28.3. **HRMS** (ESI) *m/z*: [M+H]<sup>+</sup> calcd for (C<sub>22</sub>H<sub>23</sub>N<sub>2</sub>S)<sup>+</sup>, 347.1576; found: 347.1560. **m.p.** = 100.2-100.7 °C.

***N*-(2-(5-methoxy-1-phenyl-1*H*-indol-3-yl)ethyl)acetamide (8)**

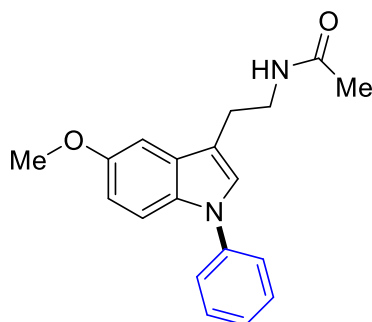

Following the general procedure, the title compound was isolated by Flash column chromatography (PE:EtOAc = 1:1) as a yellow solid in 85% (78.6 mg) yield; **<sup>1</sup>H NMR** (600 MHz, CDCl<sub>3</sub>) δ 7.50 – 7.42 (m, 5H), 7.34 – 7.28 (m, 1H), 7.17 (s, 1H), 7.10 (d, *J* = 2.4 Hz, 1H), 6.89 (dd, *J* = 8.9, 2.4 Hz, 1H), 6.07 (s, 1H), 3.88 (d, *J* = 7.1 Hz, 3H), 3.61 (dd, *J* = 12.9, 6.8 Hz, 2H), 2.98 (t, *J* = 6.9 Hz, 2H), 1.94 (s, 3H). **<sup>13</sup>C NMR** (151 MHz, CDCl<sub>3</sub>) δ 170.2, 154.3, 139.6, 131.1, 129.5, 129.2, 126.0, 125.9, 123.5, 113.7, 112.5, 111.4, 100.7, 55.8, 39.6, 25.1, 23.1. **HRMS** (ESI) *m/z*: [M+H]<sup>+</sup> calcd for (C<sub>19</sub>H<sub>21</sub>N<sub>2</sub>O<sub>2</sub>)<sup>+</sup>, 309.1598; found: 309.1584. **m.p.** = 115.2-116.3 °C.

#### 1-(3'-methoxy-[1,1'-biphenyl]-4-yl)-1H-pyrrole (9)

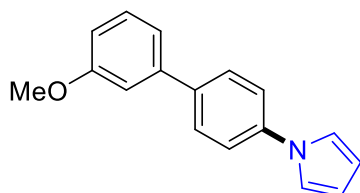

Following the general procedure, the title compound was isolated by Flash column chromatography (PE:EtOAc = 50:1) as a white solid in 95% (71.0 mg) yield; The spectral data were in accordance with those reported in the literature.<sup>14</sup> **<sup>1</sup>H NMR** (600 MHz, CDCl<sub>3</sub>) δ 7.71 – 7.66 (m, 2H), 7.52 – 7.48 (m, 2H), 7.42 (t, *J* = 7.9 Hz, 1H), 7.25 (dd, *J* = 7.9, 7.4 Hz, 1H), 7.21 – 7.19 (m, 1H), 7.19 (m, 2H), 6.99 – 6.94 (m, 1H), 6.44 (m, 2H), 3.92 (s, 3H). **<sup>13</sup>C NMR** (151 MHz, CDCl<sub>3</sub>) δ 160.0, 141.6, 139.9, 138.2, 129.8, 128.1, 120.5, 119.3, 119.2, 112.7, 112.6, 110.5, 55.2.

#### *N,N*-diethyl-4-(1H-pyrrol-1-yl)aniline (10)

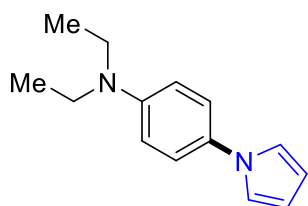

Following the general procedure, the title compound was isolated by Flash column chromatography (PE:EtOAc = 100:1) as a yellow solid in 72% (46.3 mg) yield; **<sup>1</sup>H NMR** (600 MHz, CDCl<sub>3</sub>) δ 7.27 (dd, *J* = 7.9, 1.0 Hz, 2H), 7.00 (m, 2H), 6.74 (d, *J* = 9.0 Hz, 2H), 6.33 (m, 2H), 3.40 (q, *J* = 7.1 Hz, 4H), 1.21 (t, *J* = 7.1 Hz, 6H). **<sup>13</sup>C NMR** (151 MHz, CDCl<sub>3</sub>) δ 146.2, 130.2, 122.6, 119.8, 112.2, 109.1, 44.5, 12.5. **HRMS** (APCI) *m/z*: [M+H]<sup>+</sup> calcd for (C<sub>14</sub>H<sub>19</sub>N<sub>2</sub>)<sup>+</sup>, 215.1543; found: 215.1541. **m.p.** = 116.5-117.1 °C.

#### 1-(4-(*p*-tolylloxy)phenyl)-1H-pyrrole (11)

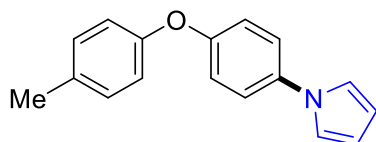

Following the general procedure, the title compound was isolated by Flash column chromatography (PE:EtOAc = 100:1) as a white solid in 68% (50.8 mg) yield; **<sup>1</sup>H NMR** (600 MHz, CDCl<sub>3</sub>) δ 7.37 – 7.34 (m, 2H), 7.19 (d, *J* = 8.2 Hz, 2H), 7.08 – 7.07 (m, 1H), 7.06 (m, 3H), 7.00 – 6.96 (m, 2H), 6.37 (m, 2H), 2.38 (s, 3H). **<sup>13</sup>C NMR** (151 MHz, CDCl<sub>3</sub>) δ 155.6, 154.7, 136.1, 133.1, 130.3, 122.0, 119.6, 119.2, 119.0, 110.1, 20.7. **HRMS** (APCI) *m/z*: [M+H]<sup>+</sup> calcd for (C<sub>17</sub>H<sub>16</sub>NO)<sup>+</sup>, 250.1226; found: 250.1224. **m.p.** = 98.0-98.9 °C.

#### 1-(4-(1H-pyrrol-1-yl)phenyl)-1H-indole (12)

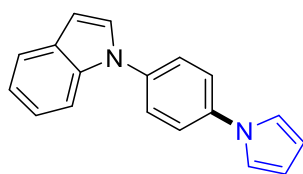

Following the general procedure, the title compound was isolated by Flash column chromatography (PE:EtOAc = 100:1) as a yellow solid in 90% (69.7 mg) yield; **<sup>1</sup>H NMR** (600 MHz, CDCl<sub>3</sub>) δ 7.79 (d, *J* = 7.8 Hz, 1H), 7.63 (d, *J* = 8.2 Hz, 1H), 7.60 – 7.54 (m, 4H), 7.39 (d, *J* = 3.2 Hz, 1H), 7.35 – 7.30 (m, 1H), 7.30 – 7.25 (m, 1H), 7.20 (m, 2H), 6.78 (d, *J* = 3.1 Hz, 1H), 6.48 (m, 2H). **<sup>13</sup>C NMR** (151 MHz, CDCl<sub>3</sub>) δ 138.9, 137.2, 135.8, 129.2, 127.8, 125.3, 122.5, 121.4, 121.2, 120.5, 119.3, 110.8, 110.3, 103.8. **HRMS** (APCI) *m/z*: [M+H]<sup>+</sup> calcd for (C<sub>18</sub>H<sub>15</sub>N<sub>2</sub>)<sup>+</sup>, 259.1230; found: 259.1228. **m.p.** = 115.9-116.8 °C.

#### 4'-chloro-3-methoxy-1,1'-biphenyl (9a)

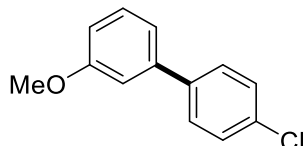

Following the general procedure, the title compound was isolated by Flash column chromatography (PE:EtOAc = 100:1) as a colorless oil in 88% (191.9 mg) yield; The spectral data were in accordance with those reported in the literature.<sup>15</sup> **<sup>1</sup>H NMR** (600 MHz, CDCl<sub>3</sub>) δ 7.54 – 7.51 (m, 2H), 7.43 – 7.40 (m, 2H), 7.37 (t, *J* = 7.9 Hz, 1H), 7.15 (ddd, *J* = 7.6, 1.5, 0.9 Hz, 1H), 7.11 – 7.09 (m, 1H), 6.92 (ddd, *J* = 8.2, 2.5, 0.7 Hz, 1H), 3.88 (s, 3H). **<sup>13</sup>C NMR** (151 MHz, CDCl<sub>3</sub>) δ 160.0, 141.5, 139.5, 133.5, 129.9, 128.8, 128.4, 119.4, 112.9, 112.8, 55.3.

#### 4-chloro-*N,N*-diethylaniline (10a)

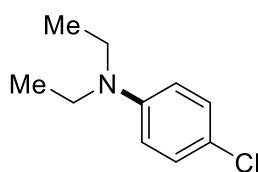

Following the general procedure, the title compound was isolated by Flash column chromatography (PE:EtOAc = 20:1) as a yellow oil in 55% (100.7 mg) yield; The spectral data were in accordance with

those reported in the literature.<sup>16</sup> **<sup>1</sup>H NMR** (600 MHz, CDCl<sub>3</sub>) δ 7.17 – 7.13 (m, 2H), 6.61 – 6.57 (m, 2H), 3.33 (q, *J* = 7.1 Hz, 4H), 1.15 (t, *J* = 7.1 Hz, 6H). **<sup>13</sup>C NMR** (151 MHz, CDCl<sub>3</sub>) δ 146.4, 129.0, 120.0, 112.9, 44.5, 12.4.

#### 1-chloro-4-(*p*-tolxyloxy)benzene (11a)

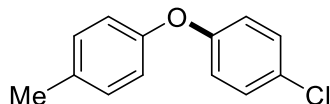

Following the general procedure, the title compound was isolated by Flash column chromatography (PE:EtOAc = 1:1) as a white solid in 60% (130.8 mg) yield; The spectral data were in accordance with those reported in the literature.<sup>17</sup> **<sup>1</sup>H NMR** (600 MHz, CDCl<sub>3</sub>) δ 7.29 – 7.25 (m, 2H), 7.16 (d, *J* = 8.2 Hz, 2H), 6.97 – 6.86 (m, 4H), 2.35 (s, 3H). **<sup>13</sup>C NMR** (151 MHz, CDCl<sub>3</sub>) δ 156.5, 154.3, 133.3, 130.3, 129.6, 127.7, 119.5, 119.1, 20.7.

#### 1-(4-chlorophenyl)-1*H*-indole (12a)

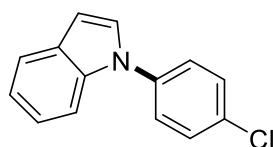

Following the general procedure, the title compound was isolated by Flash column chromatography (PE:EtOAc = 50:1) as a yellow oil in 52% (118.1 mg) yield; The spectral data were in accordance with those reported in the literature.<sup>18</sup> **<sup>1</sup>H NMR** (600 MHz, CDCl<sub>3</sub>) δ 7.72 (d, *J* = 7.8 Hz, 1H), 7.54 (dd, *J* = 8.3, 0.7 Hz, 1H), 7.52 – 7.49 (m, 2H), 7.48 – 7.44 (m, 2H), 7.31 (d, *J* = 3.3 Hz, 1H), 7.26 (ddd, *J* = 8.2, 6.8, 1.1 Hz, 1H), 7.23 – 7.19 (m, 1H), 6.72 (dd, *J* = 3.3, 0.7 Hz, 1H). **<sup>13</sup>C NMR** (151 MHz, CDCl<sub>3</sub>) δ 138.3, 135.7, 131.9, 129.7, 129.3, 127.7, 125.5, 122.6, 121.2, 120.6, 110.2, 104.0.

## 5. Gram-Scale Experiments

In a glovebox, a flame-dried reaction tube (150 mL) equipped with a magnetic stir bar was charged with <sup>t</sup>BuOLi (400 mg, 5 mmol), chlorobenzene **1** (5.5 mmol), carbazole **21** (5.0 mmol), *n*-heptane (50 mL), Pd(dba)<sub>2</sub> (12.9 mg, 1.5 mol%), and keYPhos (11.4 mg, 1.5 mol%) before being sealed with a rubber septum. The reaction mixture was stirred at 60 °C for 24 hours. After the mixture was cooled to room temperature, the mixture was directly filtered. The solvent was evaporated in vacuo to give the crude products. The residue was purified by flash column chromatography on silica gel (petroleum ether/ethyl acetate) to give the desired product **41** (1.12 g, 92%).

## 6. References

1. P. Weber, T. Scherpf, I. Rodstein, D. Lichte, L. T. Scharf, L. J. Gooßen and V. H. Gessner, A highly active ylide-functionalized phosphine for palladium-catalyzed aminations of aryl chlorides, *Angew. Chem. Int. Ed.*, 2019, **58**, 3203–3207.
2. L. Feng, J. Yao, L. Yu and W. Duan, Palladium-catalyzed denitrative *N*-arylation of nitroarenes with pyrroles, indoles, and carbazoles, *Org. Chem. Front.*, 2022, **9**, 2351–2356.
3. V. P. Reddy, A. V. Kumar and K. R. Rao, New strategy for the synthesis of *N*-aryl pyrroles: Cu-

- catalyzed C–N cross-coupling reaction of trans-4-hydroxy-L-proline with aryl halides, *Tetrahedron Lett.*, 2011, **52**, 777–780.
4. N. Barbero and R. Martin, Ligand-free Ni-catalyzed reductive cleavage of inert carbon–sulfur bonds, *Org. Lett.*, 2012, **14**, 796–799.
  5. A. C. Sather, H. G. Lee, J. R. Colombe, A. Zhang and S. L. Buchwald, Dosage delivery of sensitive reagents enables glove-box-free synthesis, *Nature*, 2015, **524**, 208–211.
  6. K. Singh, L. M. Kabadwal, S. Bera, A. Alanthadka and D. Banerjee, Nickel-catalyzed synthesis of N-Substituted pyrroles using diols with aryl- and alkylamines, *J. Org. Chem.*, 2018, **83**, 15406–15414.
  7. Y.-C. Teo, F.-F. Yong and S. Sim, Ligand-free Cu<sub>2</sub>O-catalyzed cross coupling of nitrogen heterocycles with iodopyridines, *Tetrahedron*, 2013, **69**, 7279–7284.
  8. E.-C. Elliott, J. L. Maggs, B. K. Park, P. M. O'Neill and A. V. Stachulski, Convenient syntheses of halo-dibenz[b,f]azepines and carbamazepine analogues via N-arylindoles, *Org. Biomol. Chem.*, 2013, **11**, 8426.
  9. H. Chen, M. Lei and L. Hu, Synthesis of 1-aryl indoles via coupling reaction of indoles and aryl halides catalyzed by CuI/metformin, *Tetrahedron*, 2014, **70**, 5626–5631.
  10. J. Lim, J. D. Kim, H. C. Choi and S. Lee, CNT-CuO catalyzed C–N bond formation for N-arylation of 2-phenylindoles, *J. Org. Chem.*, 2019, **902**, 120970.
  11. T. Gehrmann, S. A. Scholl, J. L. Fillol, H. Wadepohl and L. H. Gade, Alternative reaction pathways in domino reactions of hydrazinediidozirconium complexes with alkynes, *Chem. Eur. J.*, 2012, **18**, 3925–3941.
  12. F. Panahi, F. Roozbin, S. Rahimi, M. Moayyed, A. Valaei and N. Iranpoor, A triazine-phosphite polymeric ligand bearing cage-like P,N-ligation sites: an efficient ligand in the nickel-catalyzed amination of aryl chlorides and phenols, *RSC Adv.*, 2016, **6**, 80670–80678.
  13. Z. Y. Tian, X. X. Ming, H. B. Teng, Y. T. Hu and C. P. Zhang, Transition-metal-free N-arylation of amines by triarylsulfonium triflates, *Chem. Eur. J.*, 2018, **24**, 13744–13748.
  14. J. Nasielski, N. Hadei, G. Achonduh, E. A. B. Kantchev, C. J. O'Brien, A. Lough and M. G. Organ, Structure-activity relationship analysis of Pd-PEPPSI complexes in cross-couplings: a close inspection of the catalytic cycle and the precatalyst activation model, *Chem. Eur. J.*, 2010, **16**, 10844–10853.
  15. J. Hofmann, E. Gans, T. Clark and M. R. Heinrich, Radical arylation of anilines and pyrroles via aryldiazotates, *Chem. Eur. J.*, 2017, **23**, 9647–9656.
  16. L. Zhang, Y. Zhang, Y. Deng and F. Shi, Room temperature N-alkylation of amines with alcohols under UV irradiation catalyzed by Cu–Mo/TiO<sub>2</sub>, *Catal. Sci. Technol.*, 2015, **5**, 3226–3234.
  17. T. Begum, M. Mondal, M. P. Borpuzari, R. Kar, P. K. Gogoi and U. Bora, Palladium-on-carbon-catalyzed coupling of nitroarenes with phenol: biaryl ether synthesis and evidence of an oxidative-addition-promoted mechanism, *Eur. J. Org. Chem.*, 2017, **2017**, 3244–3248.
  18. J.-W. Xie, Z.-B. Yao, X.-C. Wang and J. Zhang, Cu<sub>2</sub>O/1-(2-methylhydrazine-1-carbonyl)-isoquinoline 2-oxide catalyzed C–N cross-coupling reaction in aqueous media, *Tetrahedron*, 2019, **75**, 3788–3792.

## NMR Spectra of Starting Materials and Products

### $^1\text{H}$ NMR (600 MHz, $\text{C}_6\text{D}_6$ ) Spectrum of **keYPhos**

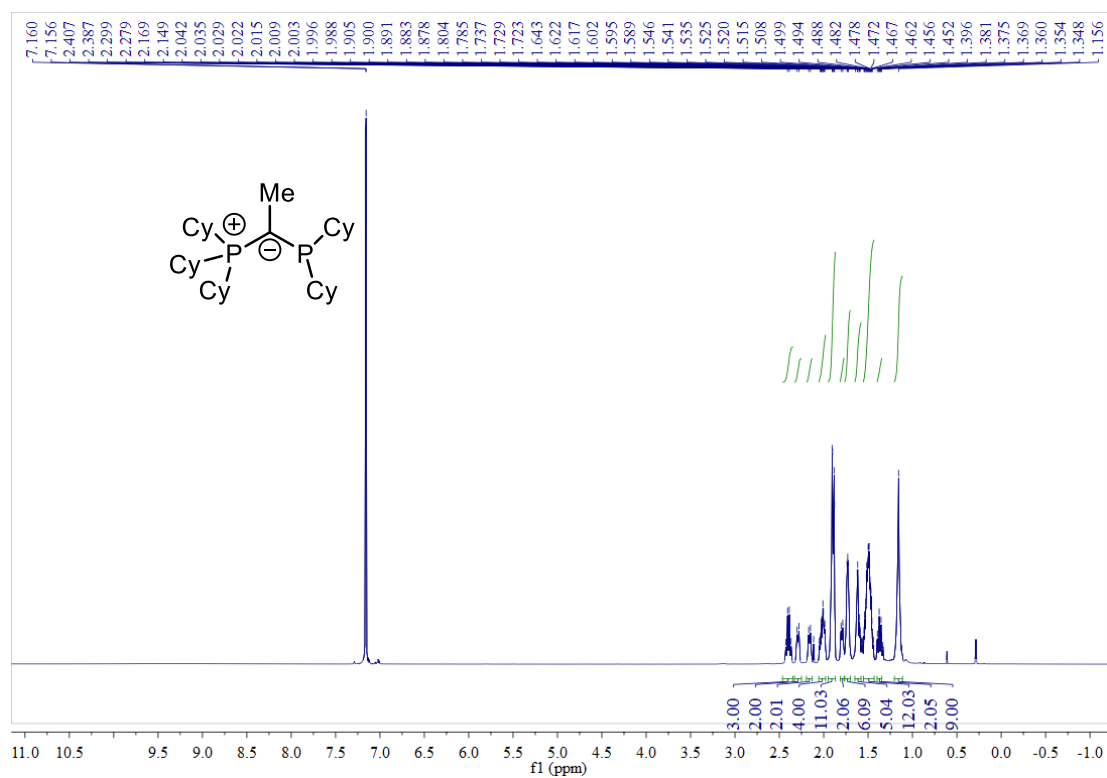

### $^{13}\text{C}$ NMR (151 MHz, $\text{C}_6\text{D}_6$ ) Spectrum of **keYPhos**

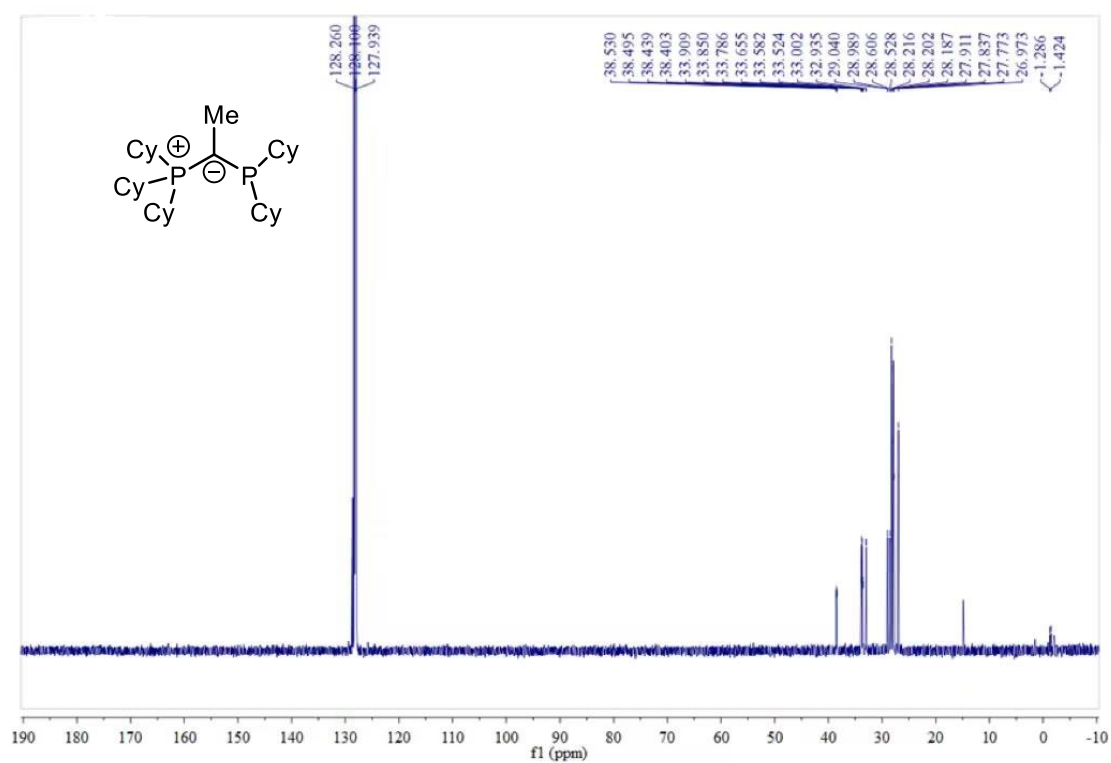

$^{31}\text{P}$  NMR(243 MHz,  $\text{C}_6\text{D}_6$ ) Spectrum of **keYPhos**

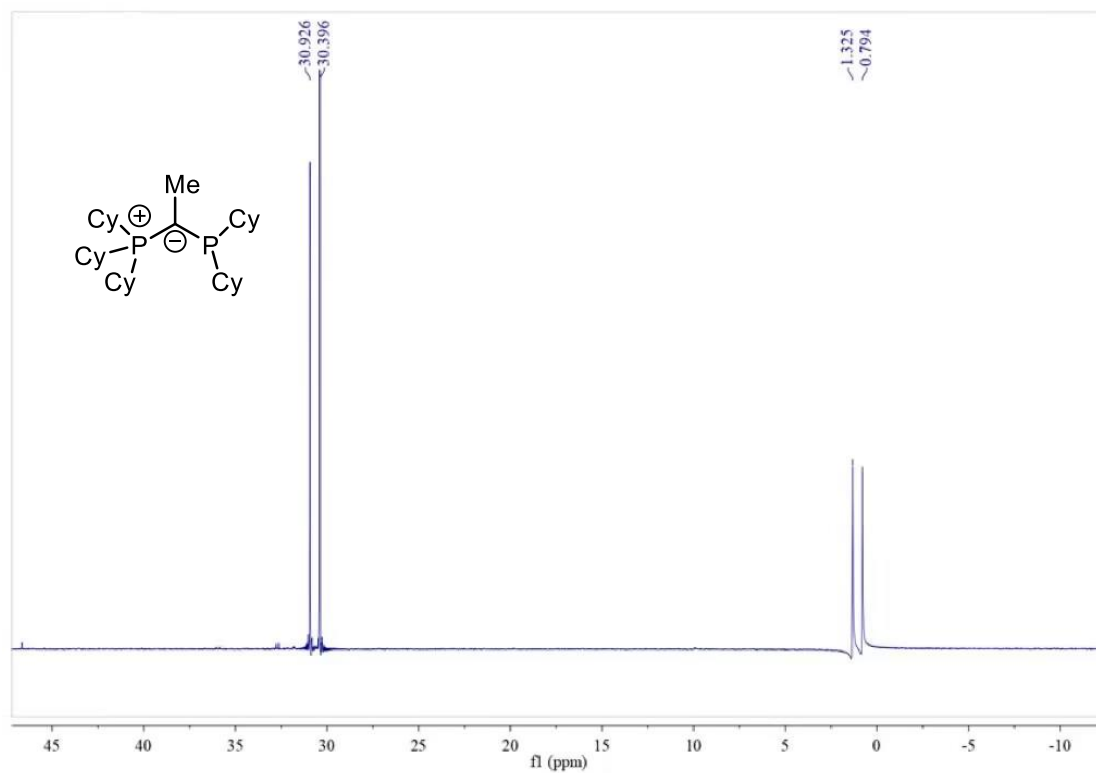

$^1\text{H}$  NMR (600 MHz,  $\text{CDCl}_3$ ) Spectrum of **3a**

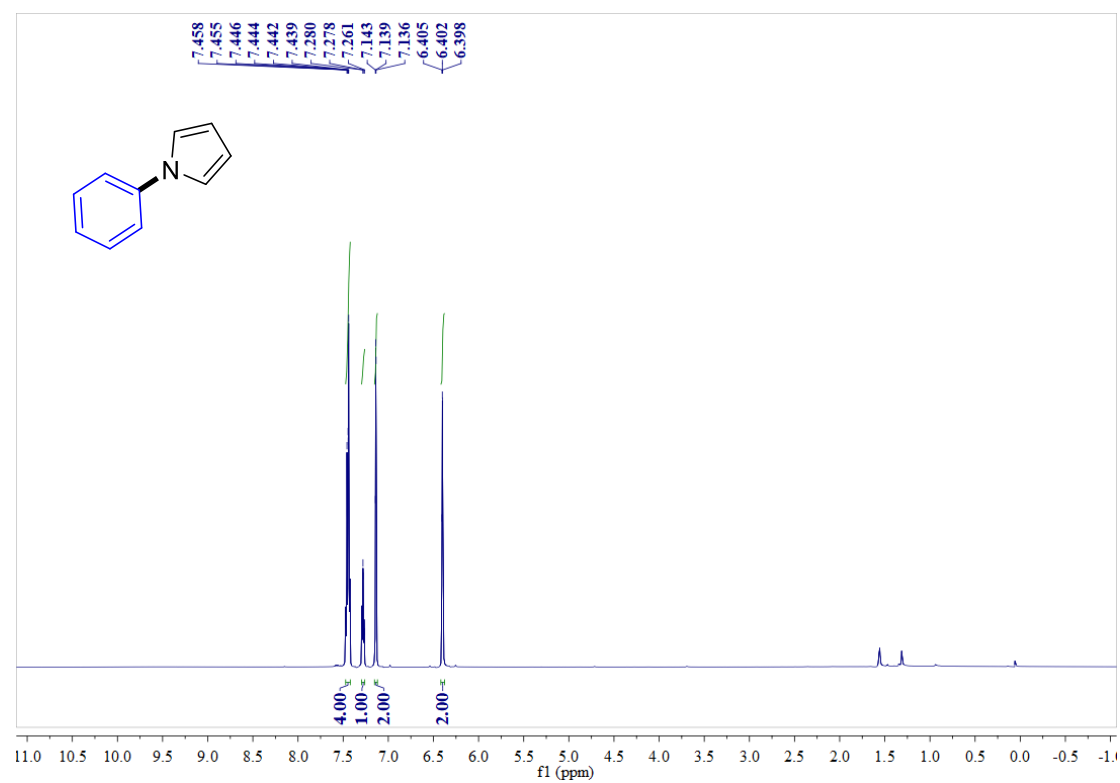



$^{13}\text{C}$  NMR (151 MHz,  $\text{CDCl}_3$ ) Spectrum of **3a**

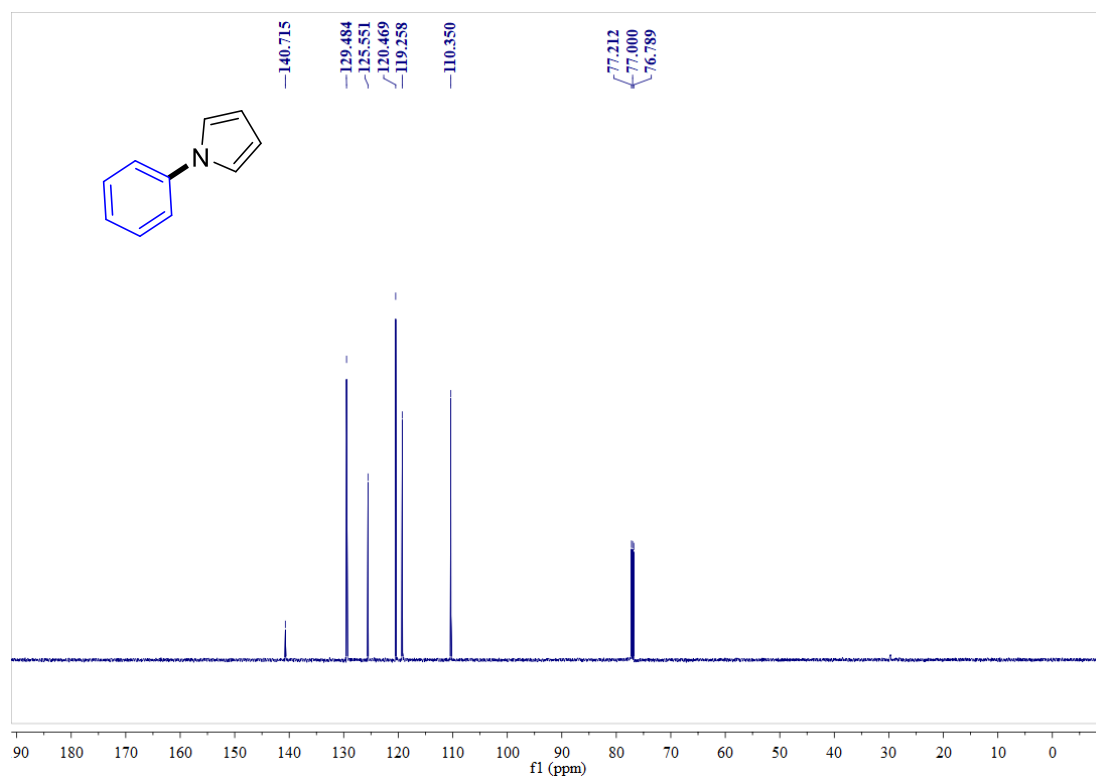

$^1\text{H}$  NMR (600 MHz,  $\text{CDCl}_3$ ) Spectrum of **3b**

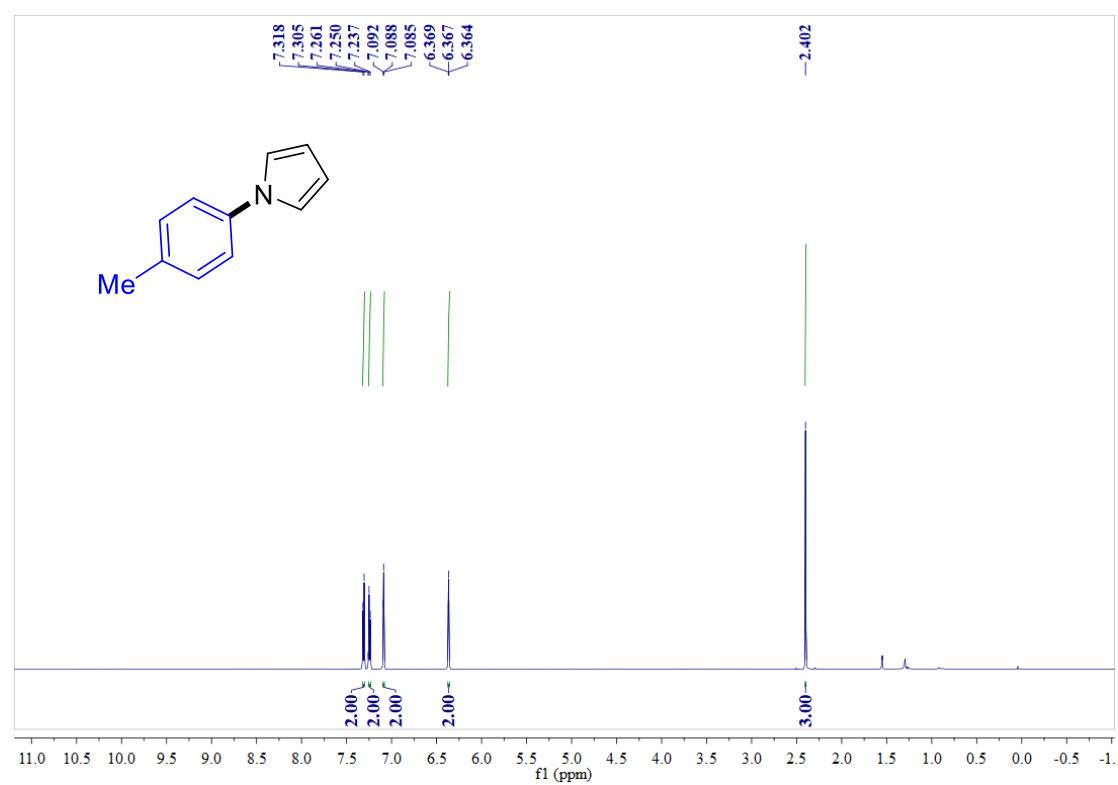

<sup>13</sup>C NMR (151 MHz, CDCl<sub>3</sub>) Spectrum of **3b**

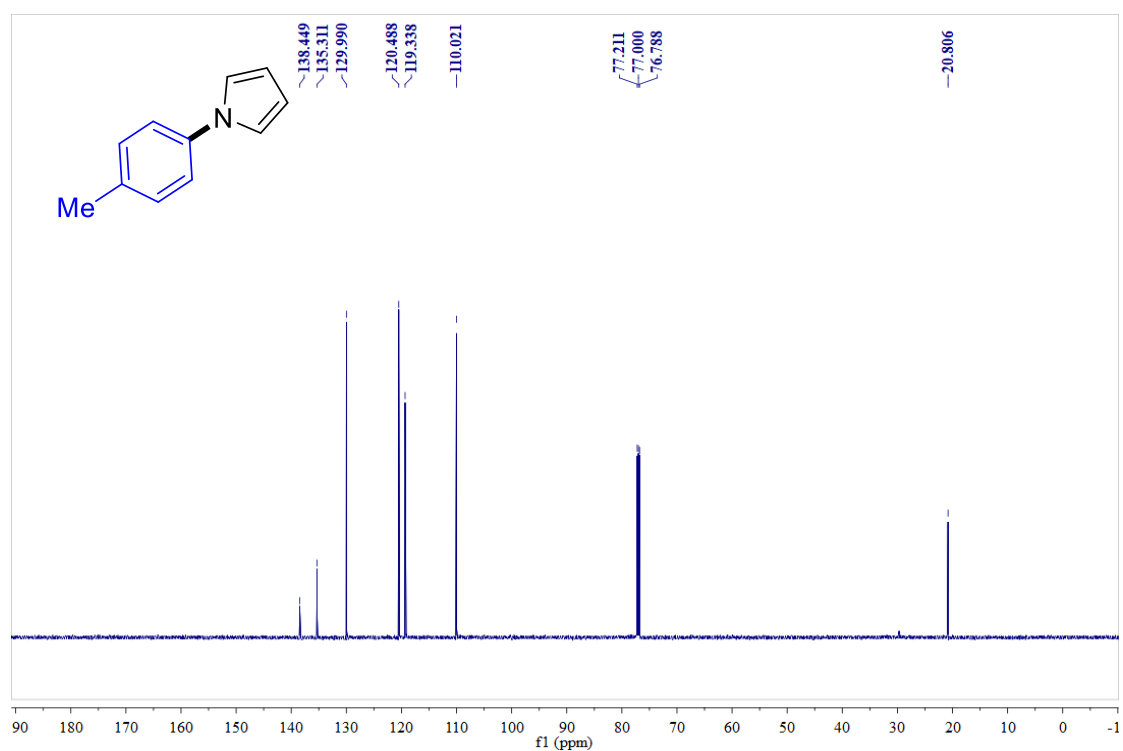

<sup>1</sup>H NMR (600 MHz, CDCl<sub>3</sub>) Spectrum of **3c**

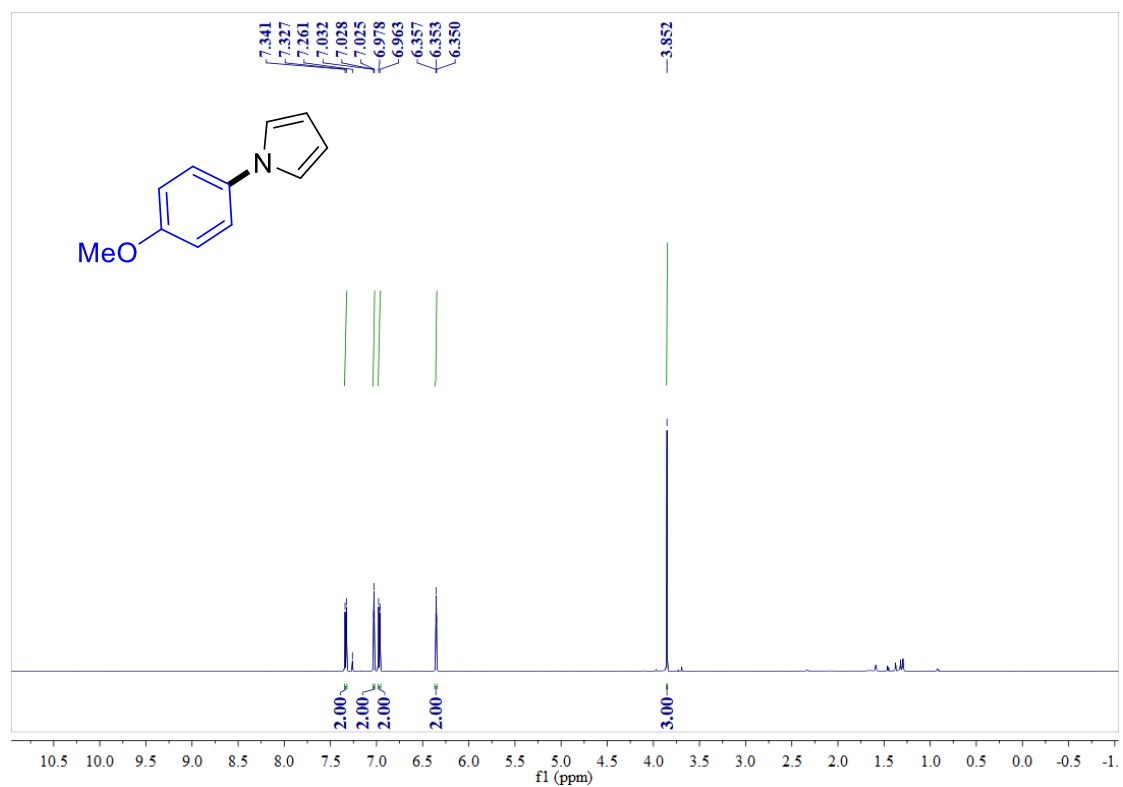

$^{13}\text{C}$  NMR (151 MHz,  $\text{CDCl}_3$ ) Spectrum of **3c**

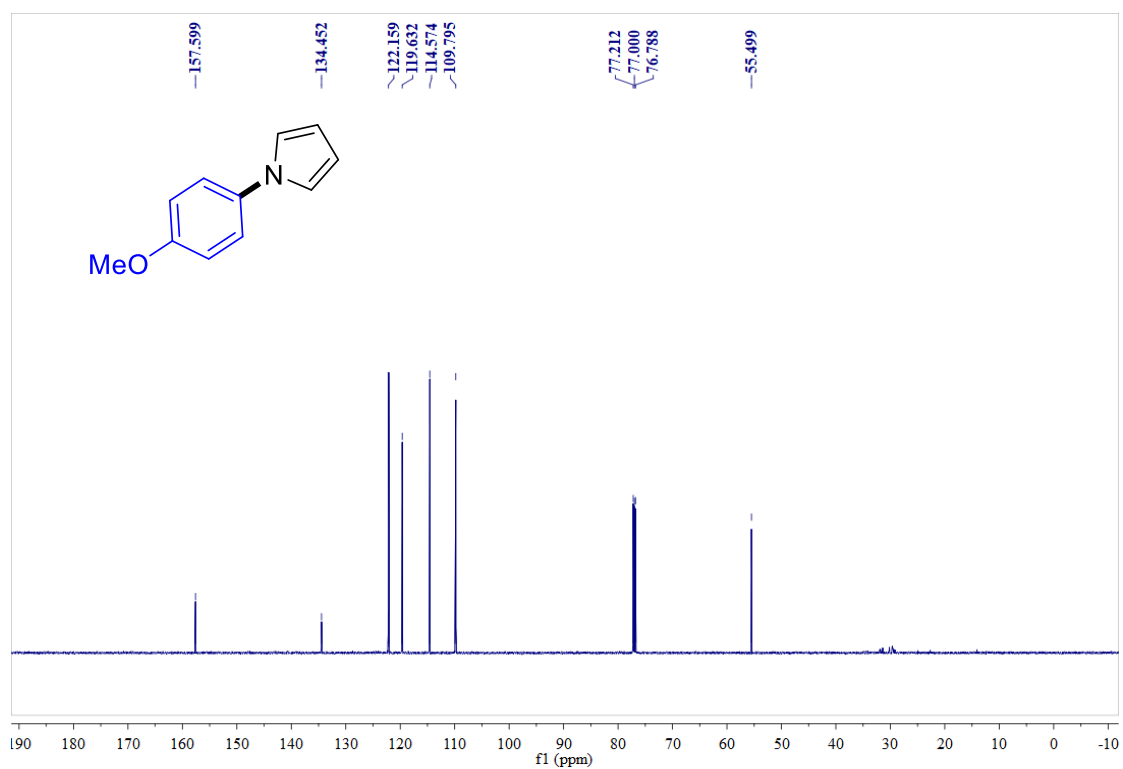

$^1\text{H}$  NMR (600 MHz,  $\text{CDCl}_3$ ) Spectrum of **3d**

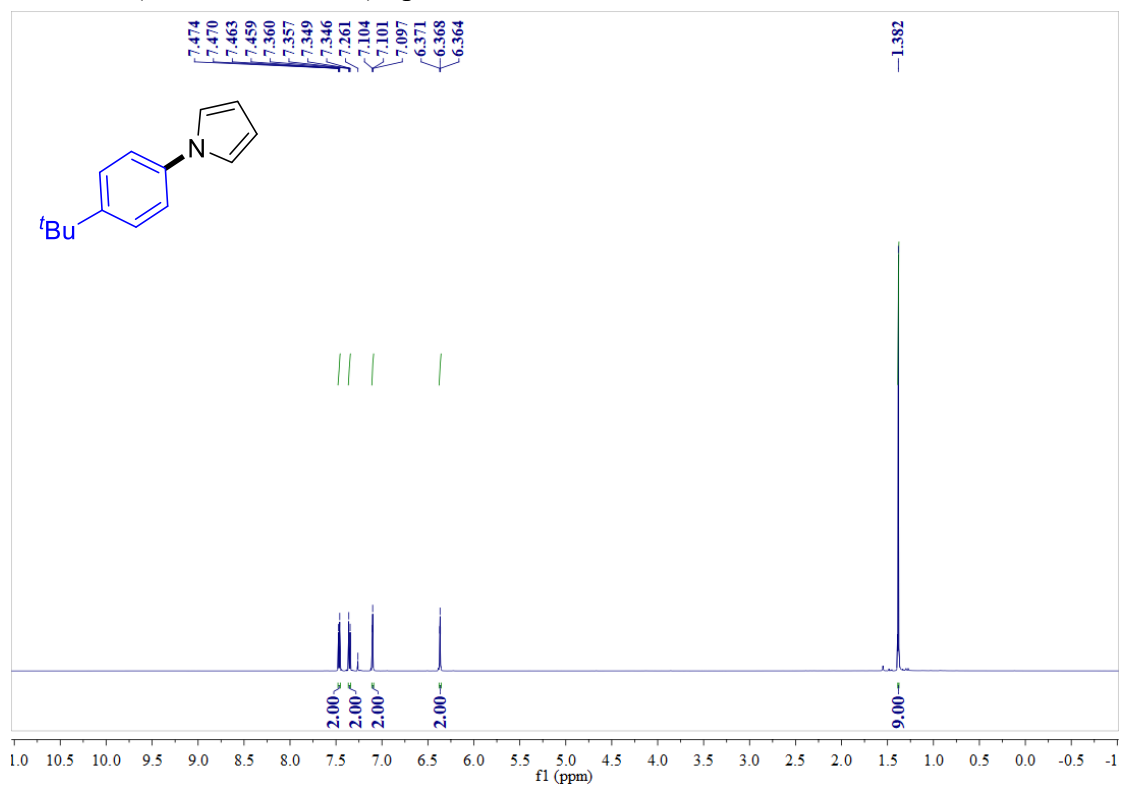

$^{13}\text{C}$  NMR (151 MHz,  $\text{CDCl}_3$ ) Spectrum of **3d**

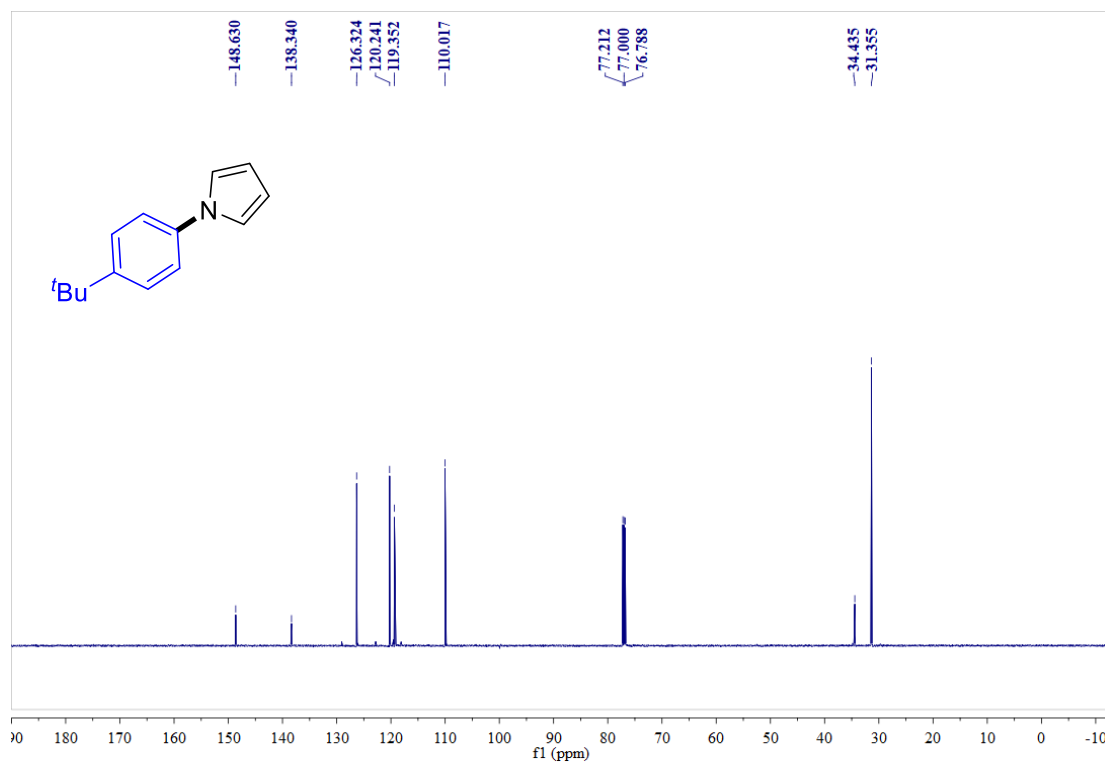

$^1\text{H}$  NMR (600 MHz,  $\text{CDCl}_3$ ) Spectrum of **3e**

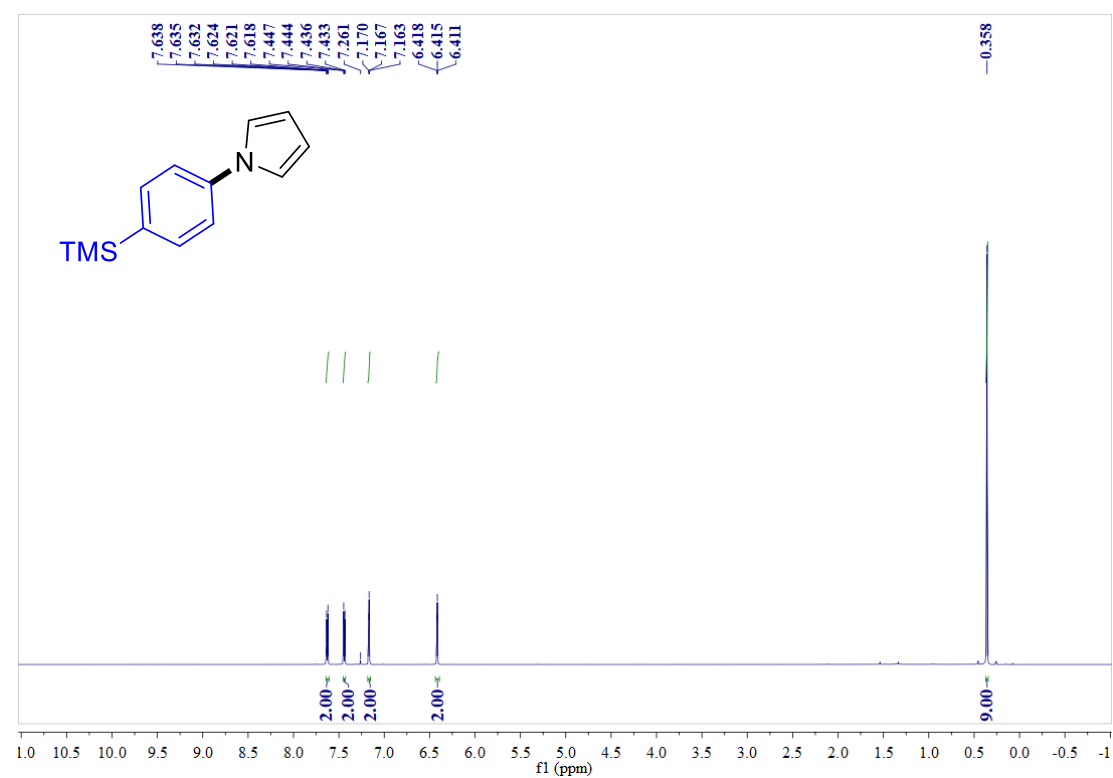

$^{13}\text{C}$  NMR (151 MHz,  $\text{CDCl}_3$ ) Spectrum of **3e**

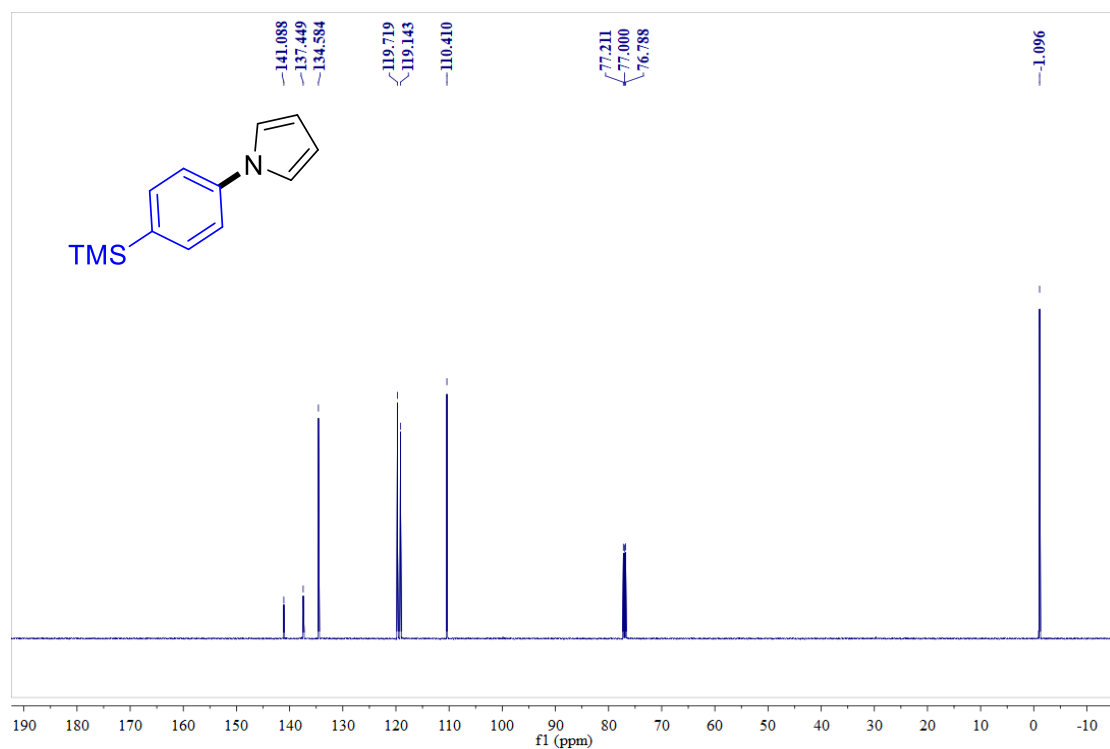

$^1\text{H}$  NMR (600 MHz,  $\text{CDCl}_3$ ) Spectrum of **3f**

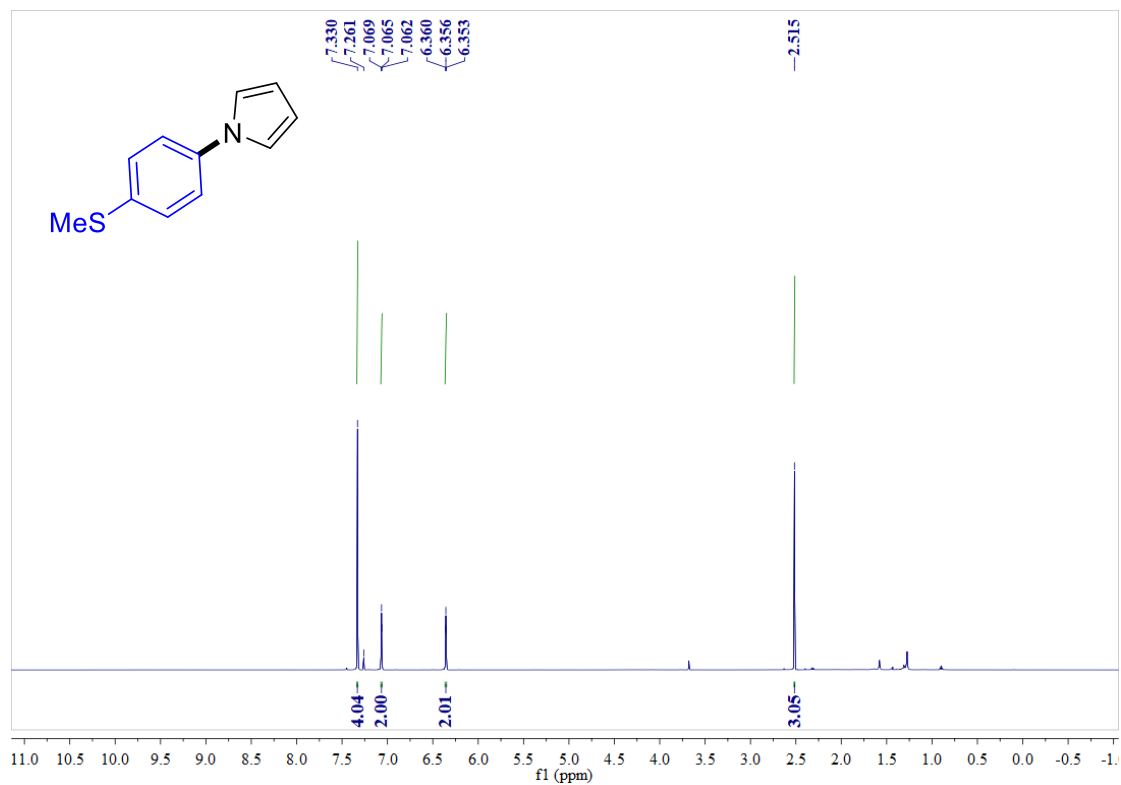

$^{13}\text{C}$  NMR (151 MHz,  $\text{CDCl}_3$ ) Spectrum of **3f**

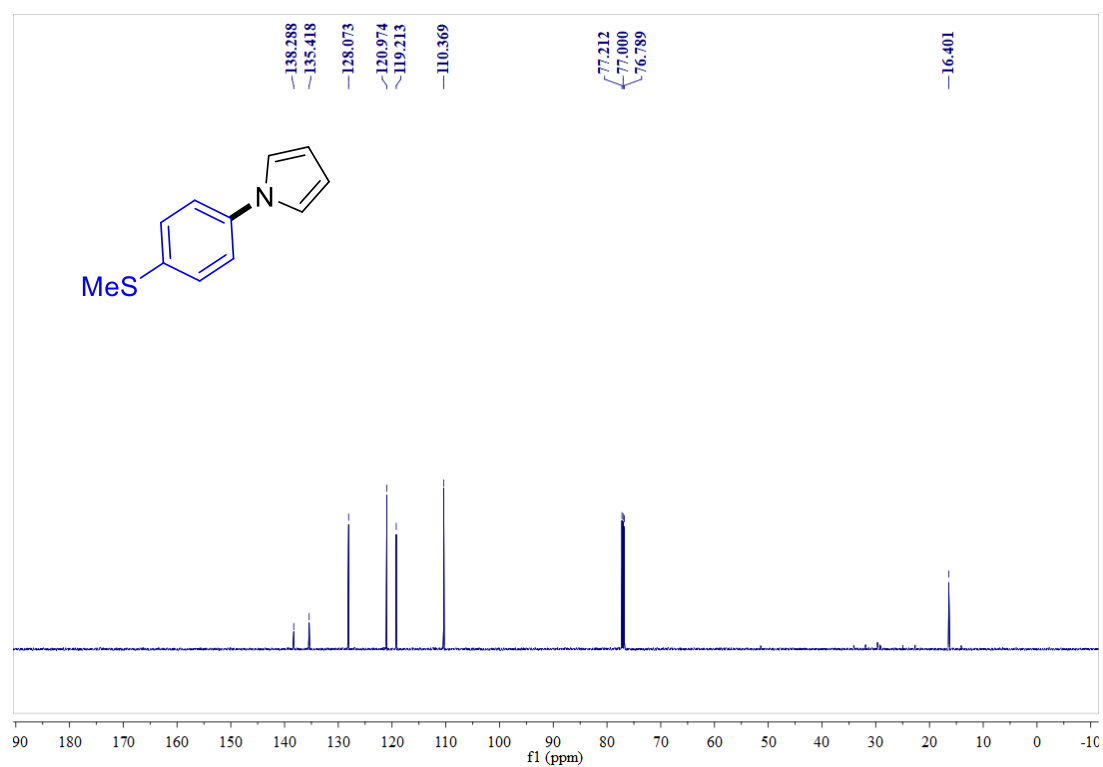

$^1\text{H}$  NMR (600 MHz,  $\text{CDCl}_3$ ) Spectrum of **3g**

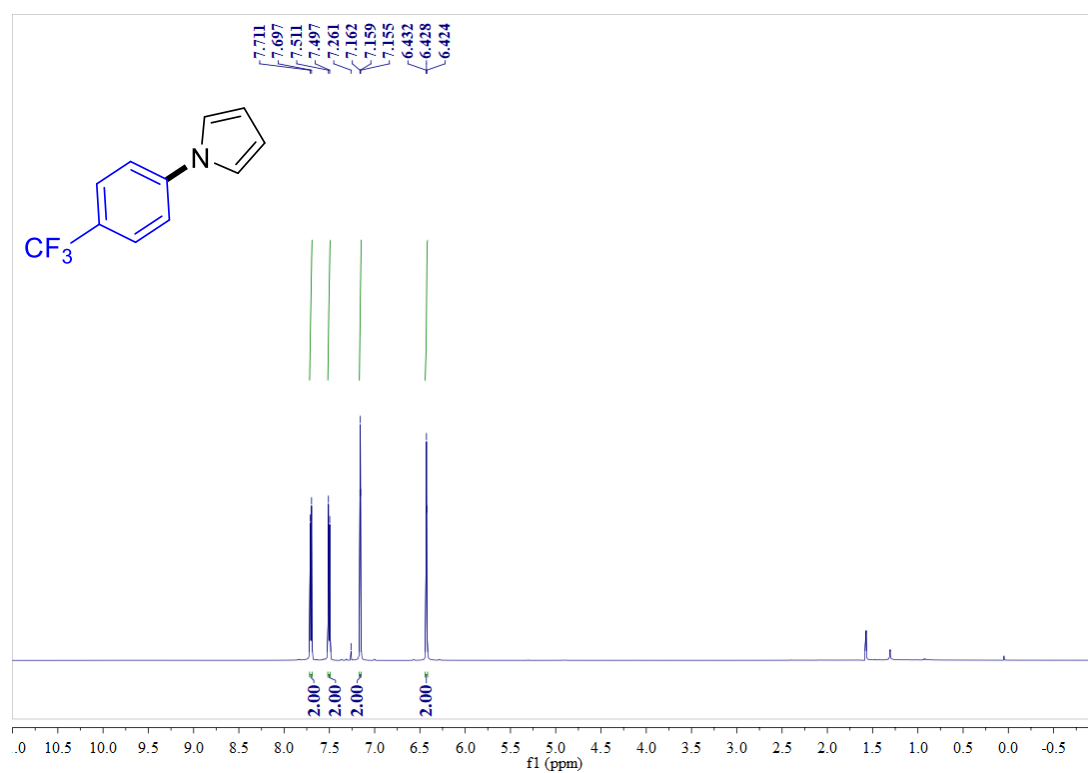

<sup>13</sup>C NMR (151 MHz, CDCl<sub>3</sub>) Spectrum of **3g**

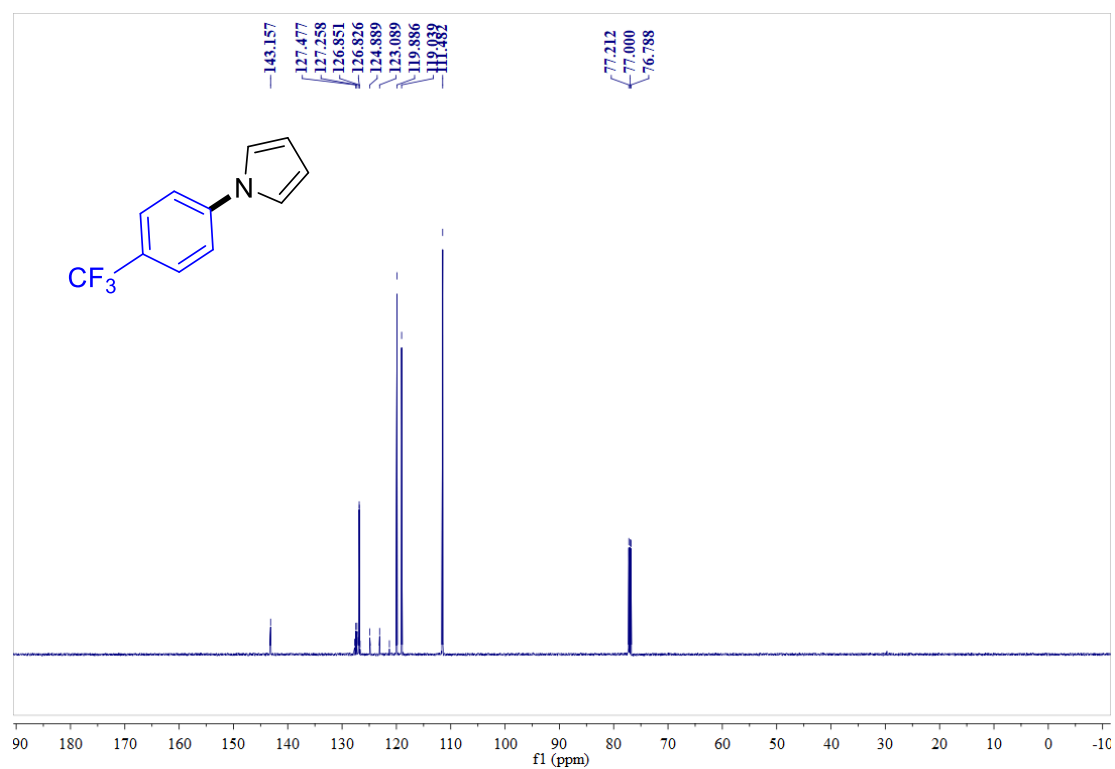

<sup>19</sup>F NMR (565 MHz, CDCl<sub>3</sub>) Spectrum of **3g**

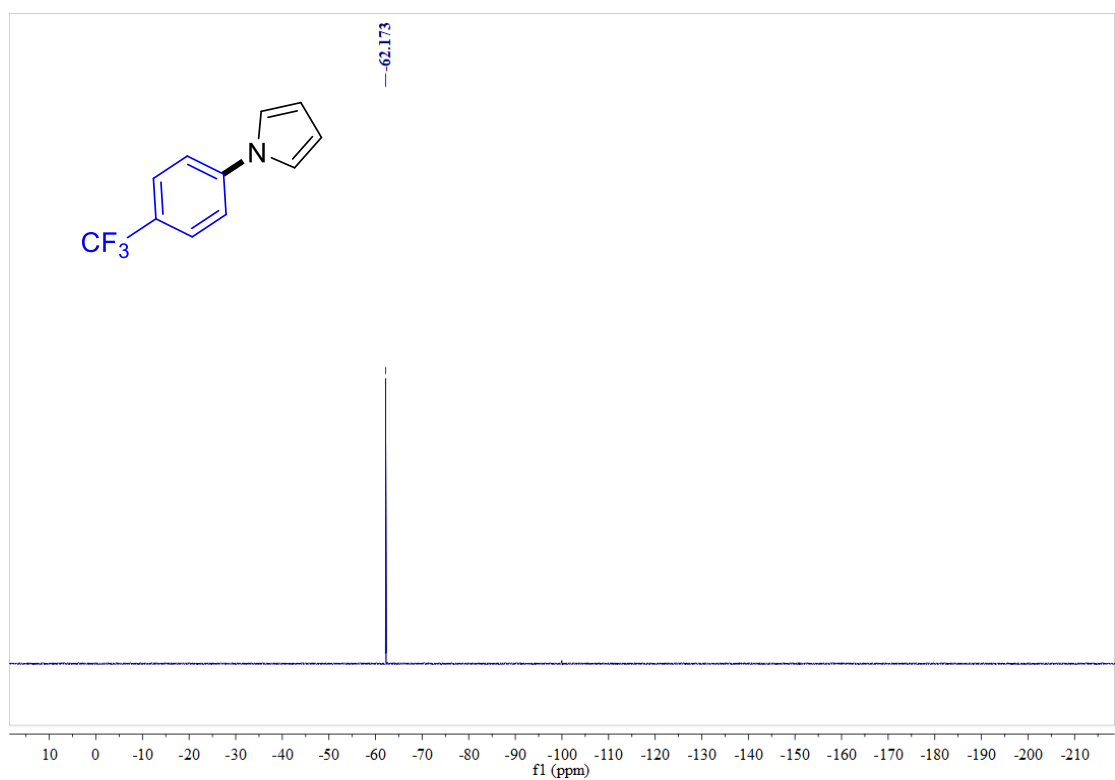

$^1\text{H}$  NMR (600 MHz,  $\text{CDCl}_3$ ) Spectrum of **3h**

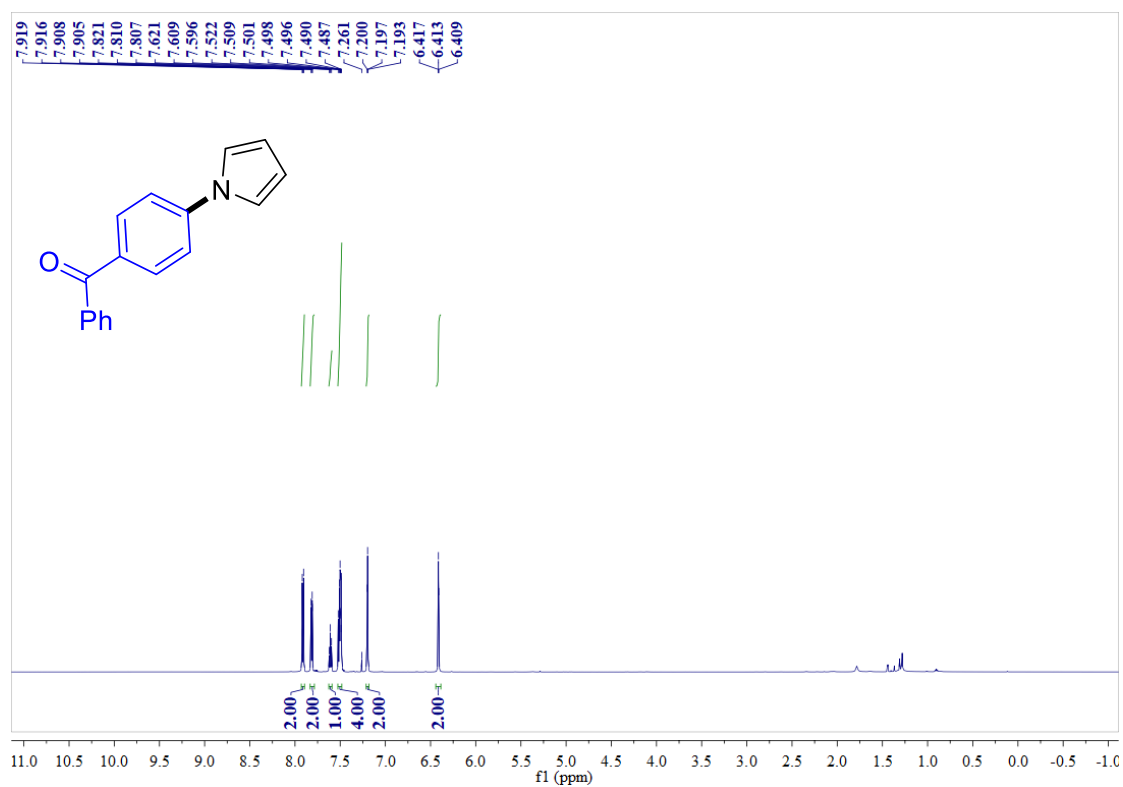

$^{13}\text{C}$  NMR (151 MHz,  $\text{CDCl}_3$ ) Spectrum of **3h**

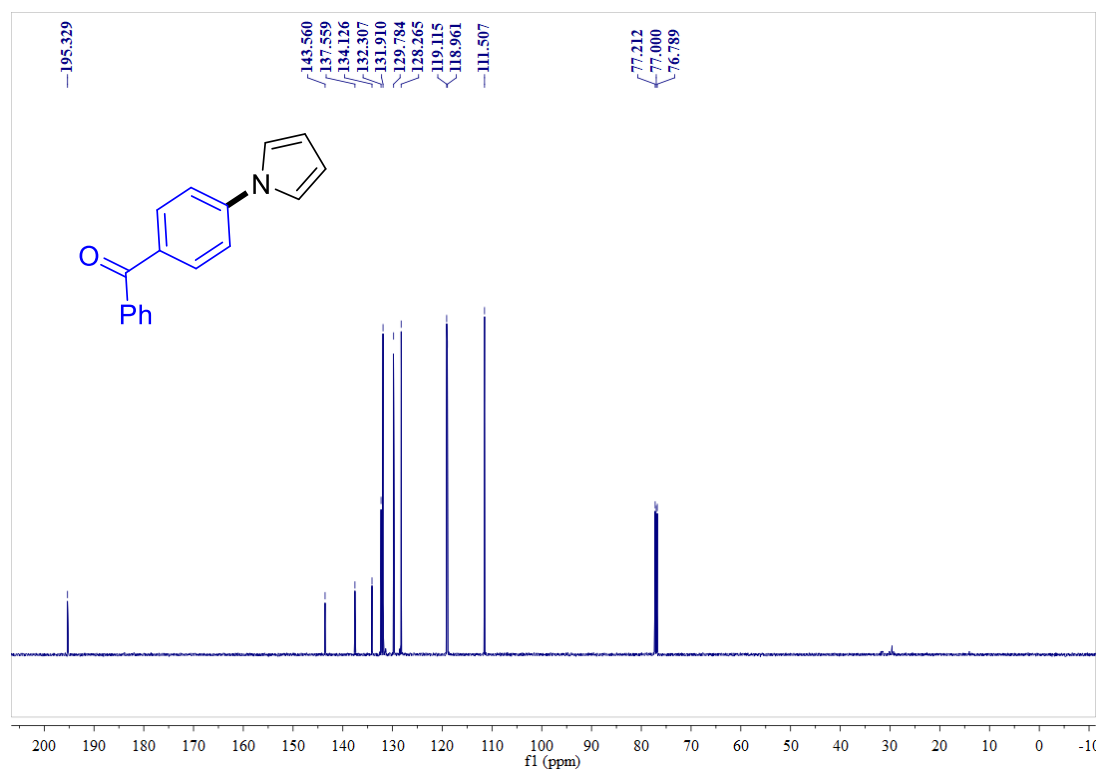



$^1\text{H}$  NMR (600 MHz,  $\text{CDCl}_3$ ) Spectrum of **3i**

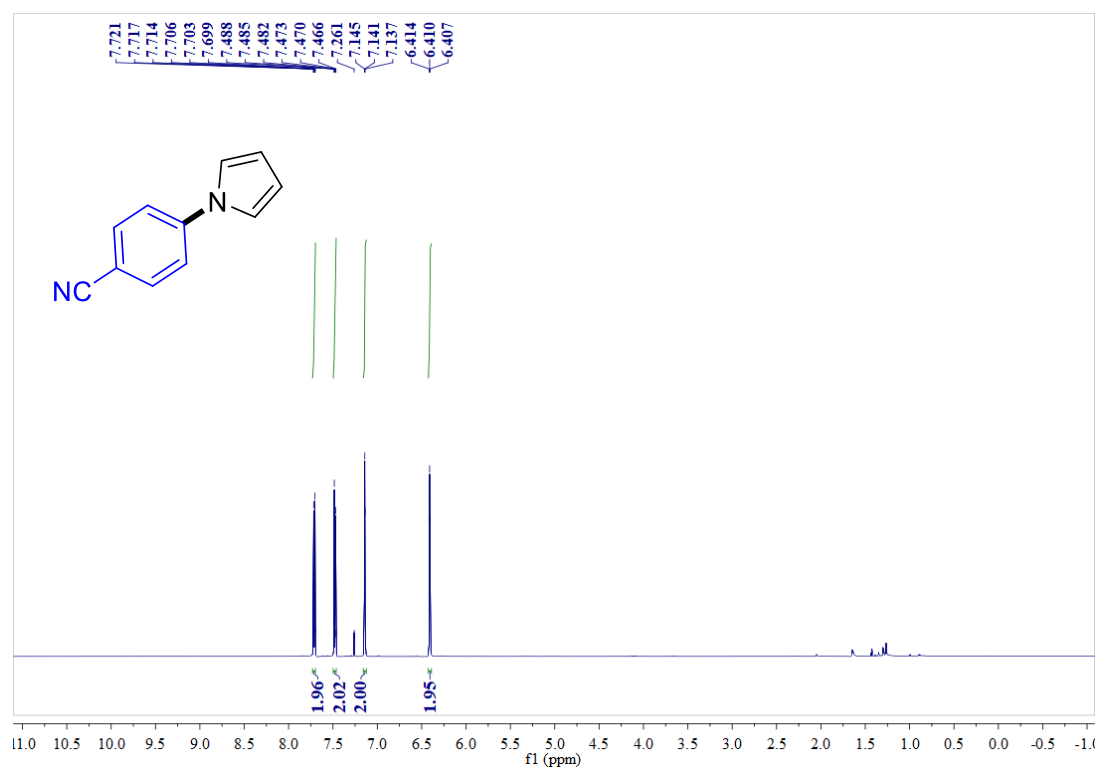

$^{13}\text{C}$  NMR (151 MHz,  $\text{CDCl}_3$ ) Spectrum of **3i**

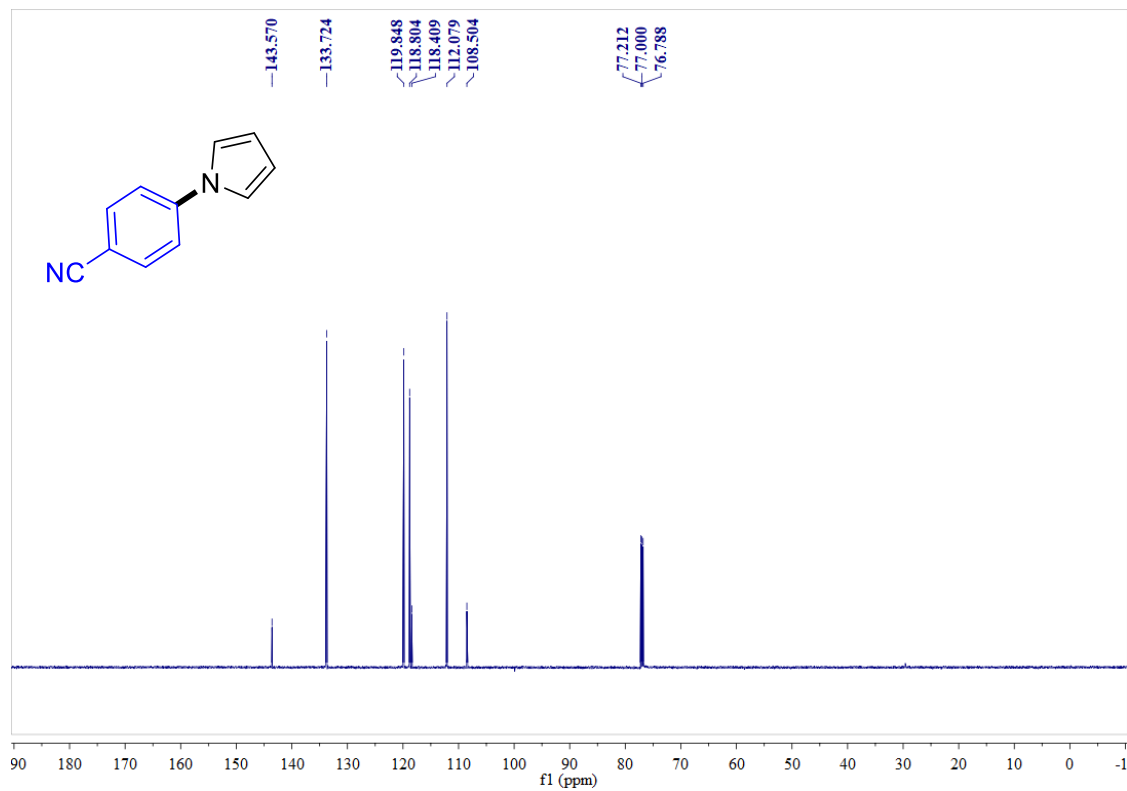

<sup>1</sup>H NMR (600 MHz, CDCl<sub>3</sub>) Spectrum of **3j**

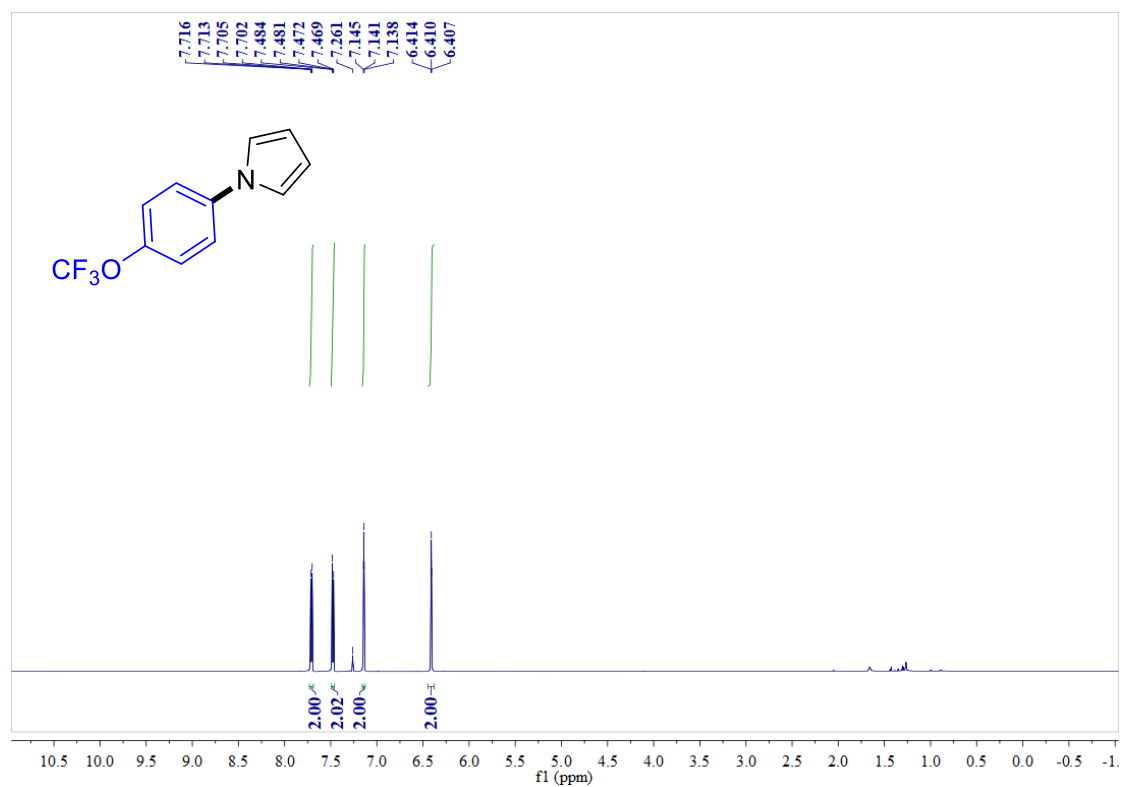

<sup>13</sup>C NMR (151 MHz, CDCl<sub>3</sub>) Spectrum of **3j**

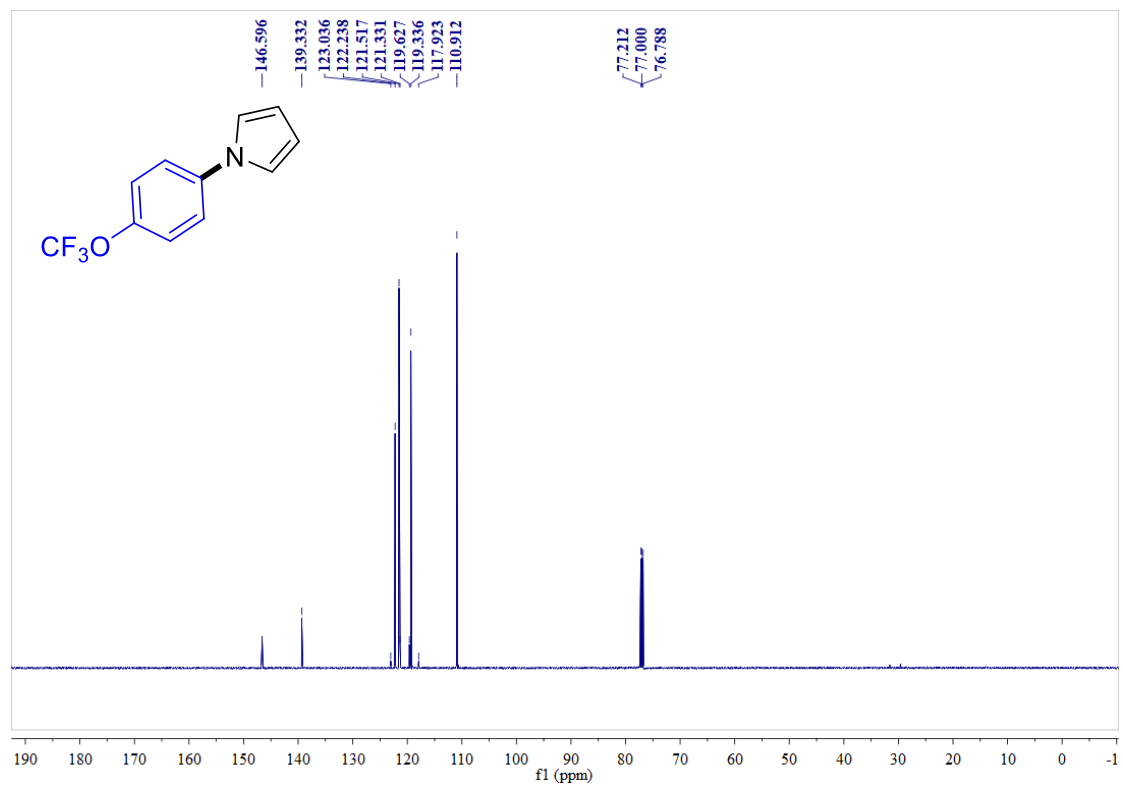

$^{19}\text{F}$  NMR (565 MHz,  $\text{CDCl}_3$ ) Spectrum of **3j**

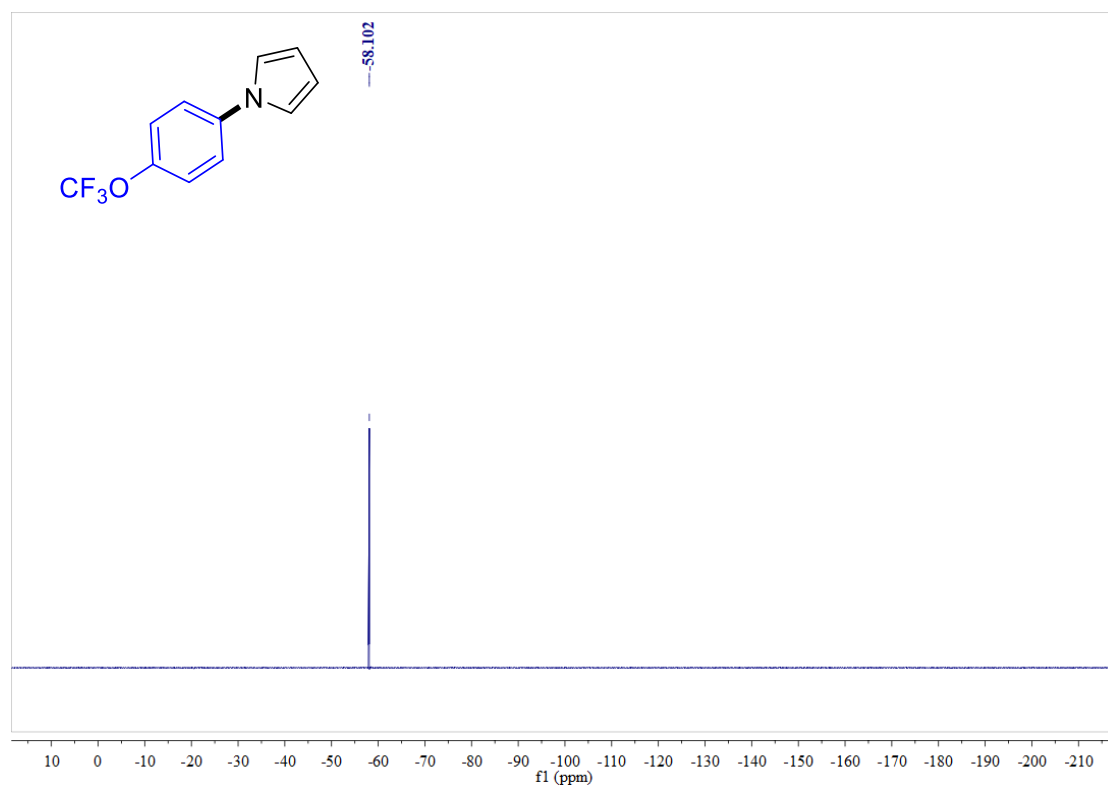

$^1\text{H}$  NMR (600 MHz,  $\text{CDCl}_3$ ) Spectrum of **3k**

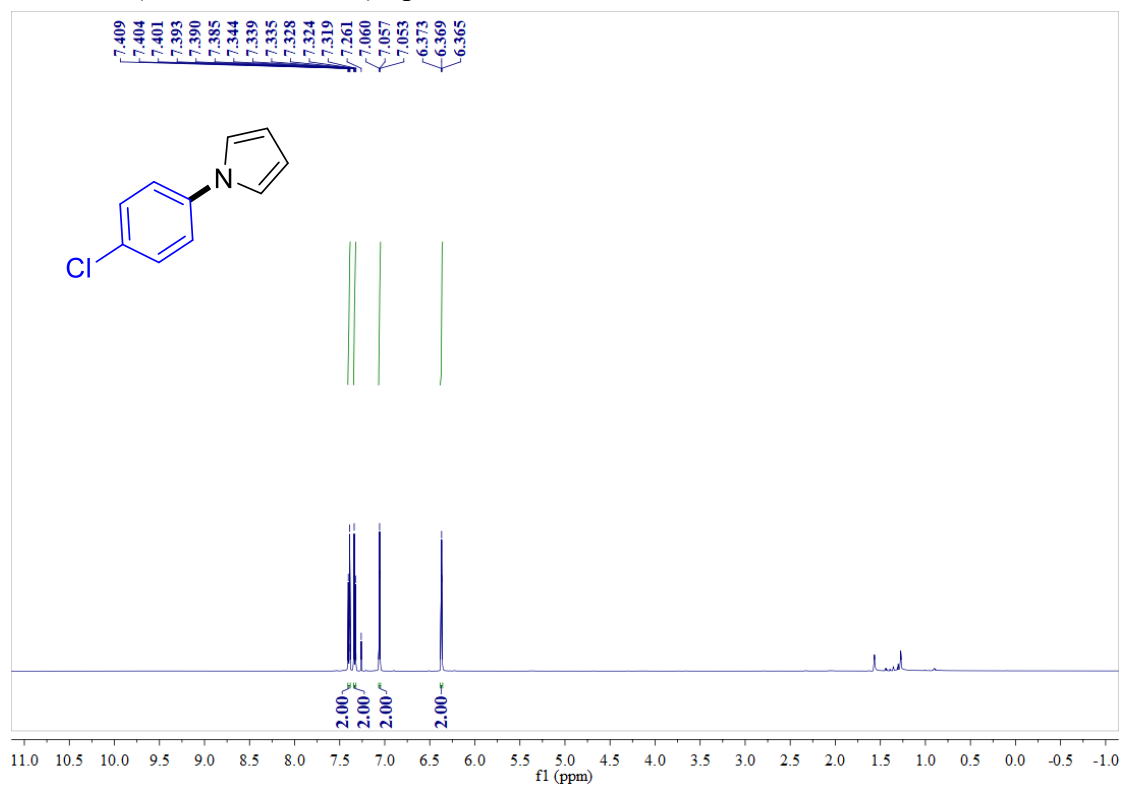

$^{13}\text{C}$  NMR (151 MHz,  $\text{CDCl}_3$ ) Spectrum of **3k**

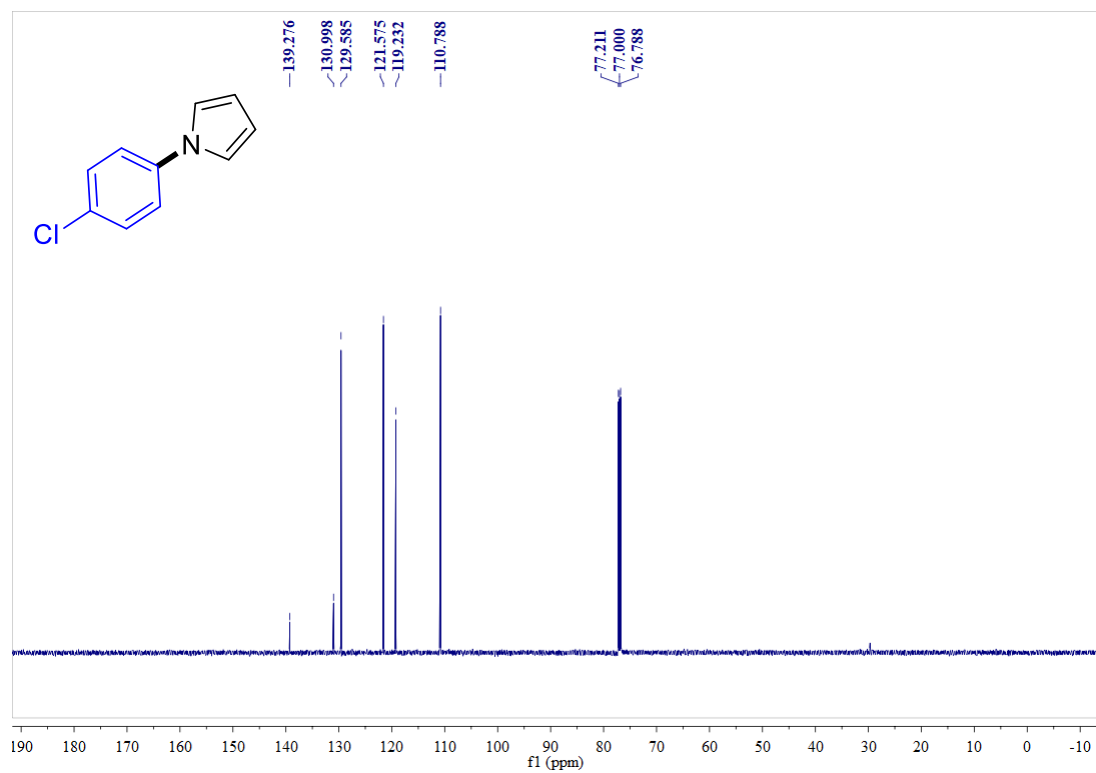

$^1\text{H}$  NMR (600 MHz,  $\text{CDCl}_3$ ) Spectrum of **3l**

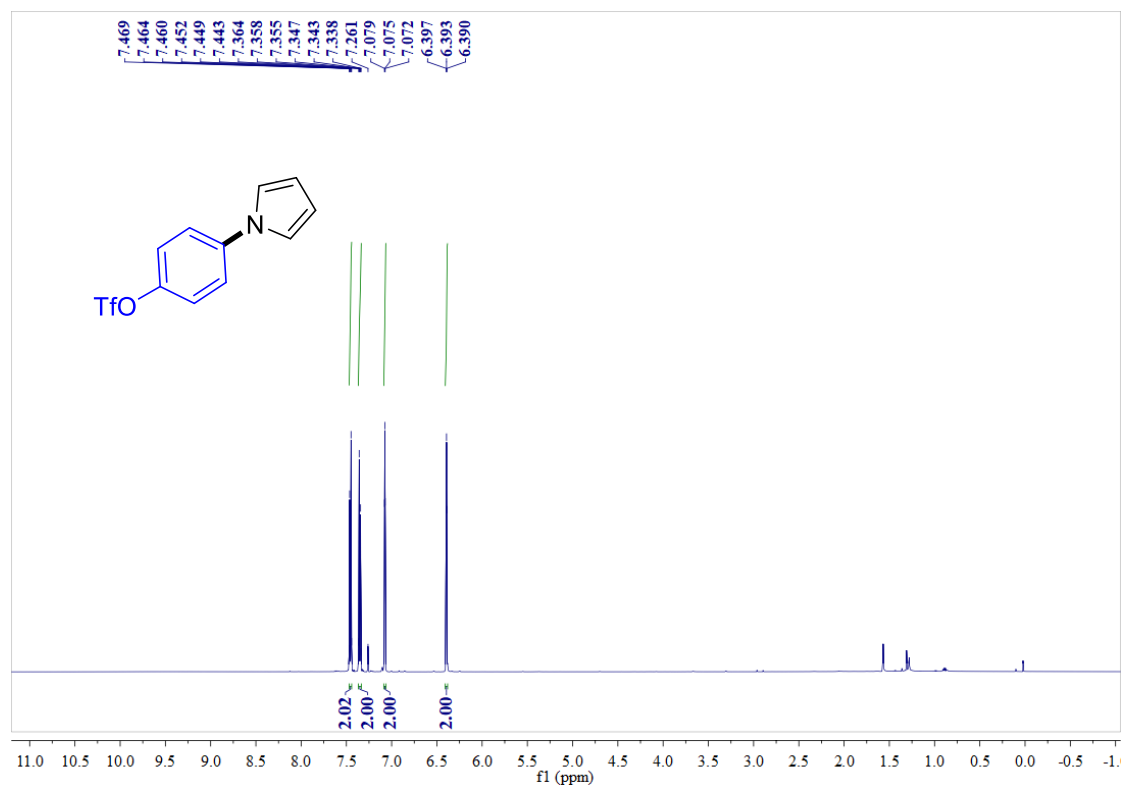

$^{13}\text{C}$  NMR (151 MHz,  $\text{CDCl}_3$ ) Spectrum of **3l**

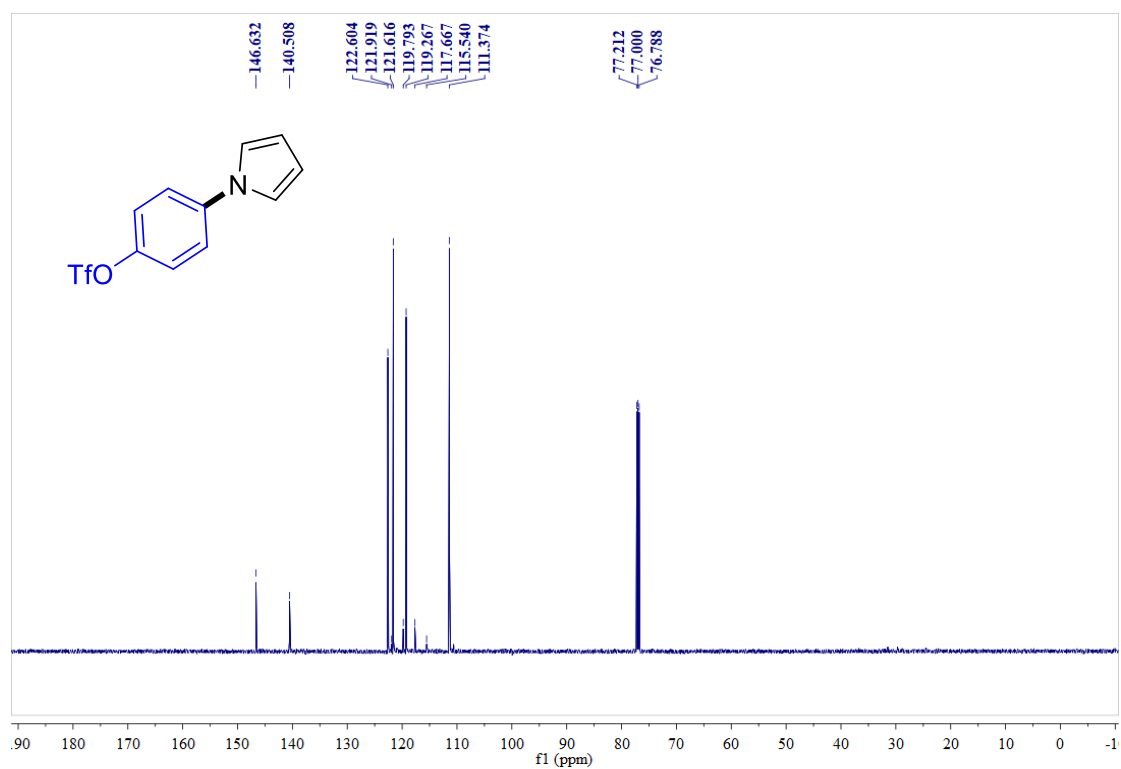

$^{19}\text{F}$  NMR (565 MHz,  $\text{CDCl}_3$ ) Spectrum of **3l**

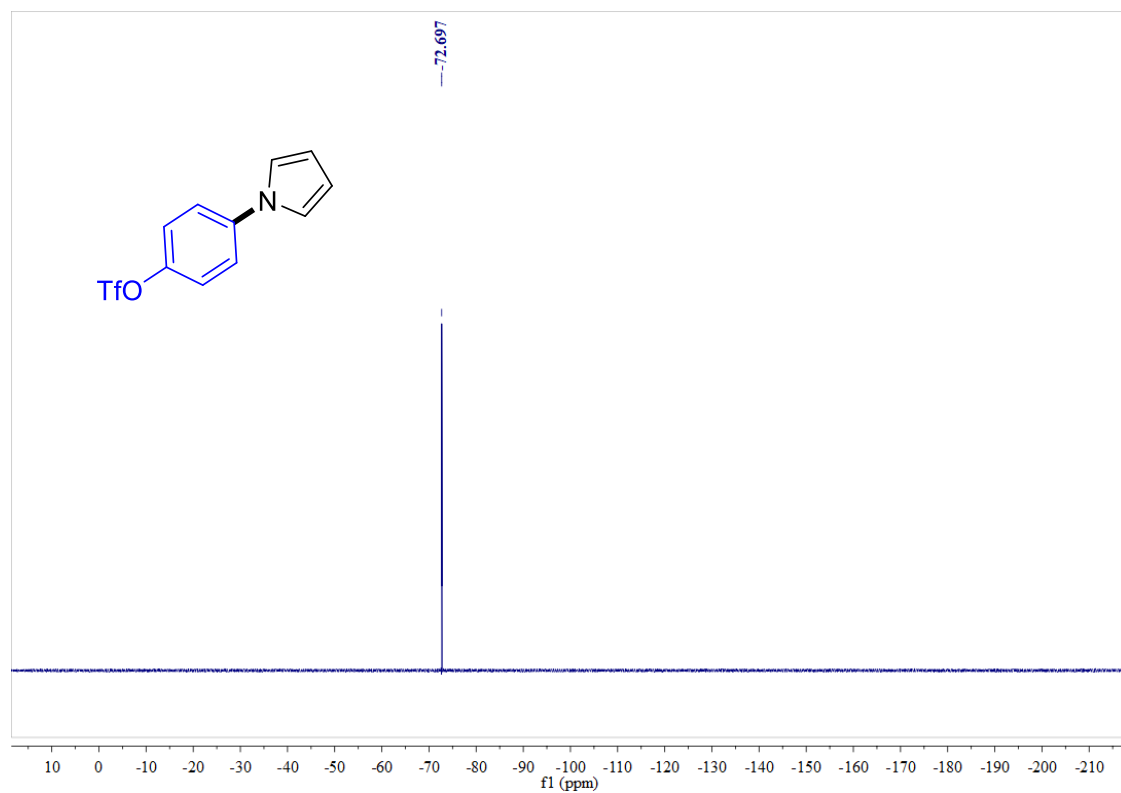

<sup>1</sup>H NMR (600 MHz, CDCl<sub>3</sub>) Spectrum of **3m**

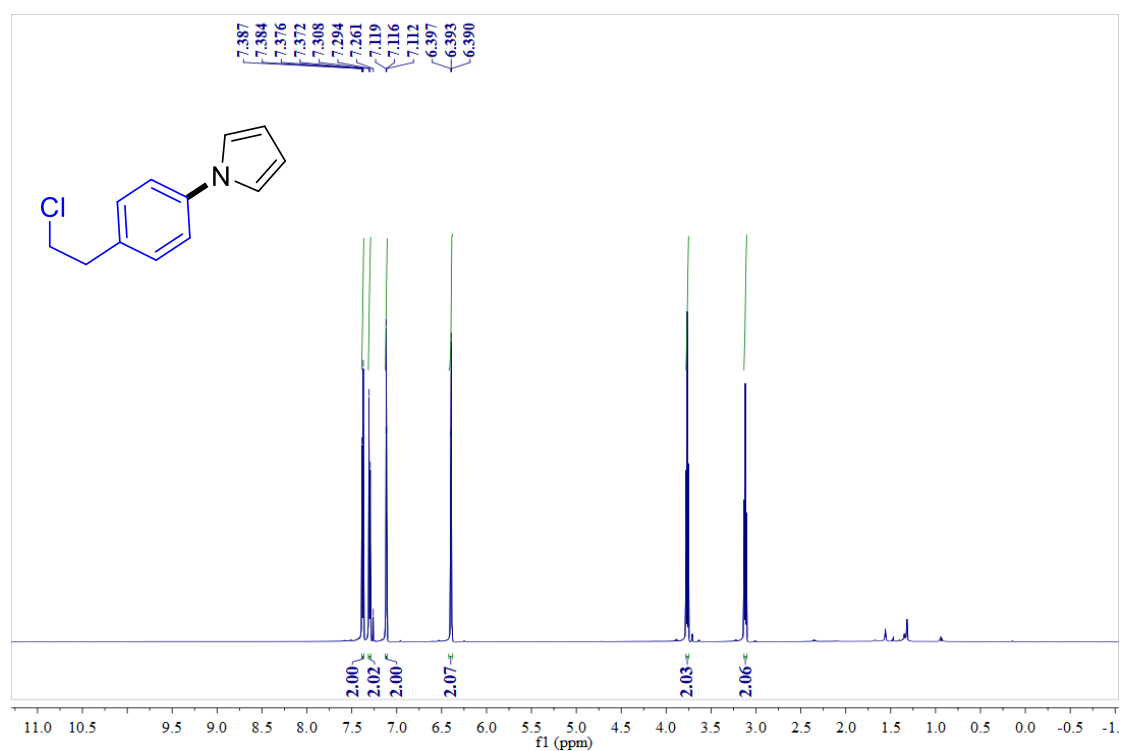

<sup>13</sup>C NMR (151 MHz, CDCl<sub>3</sub>) Spectrum of **3m**

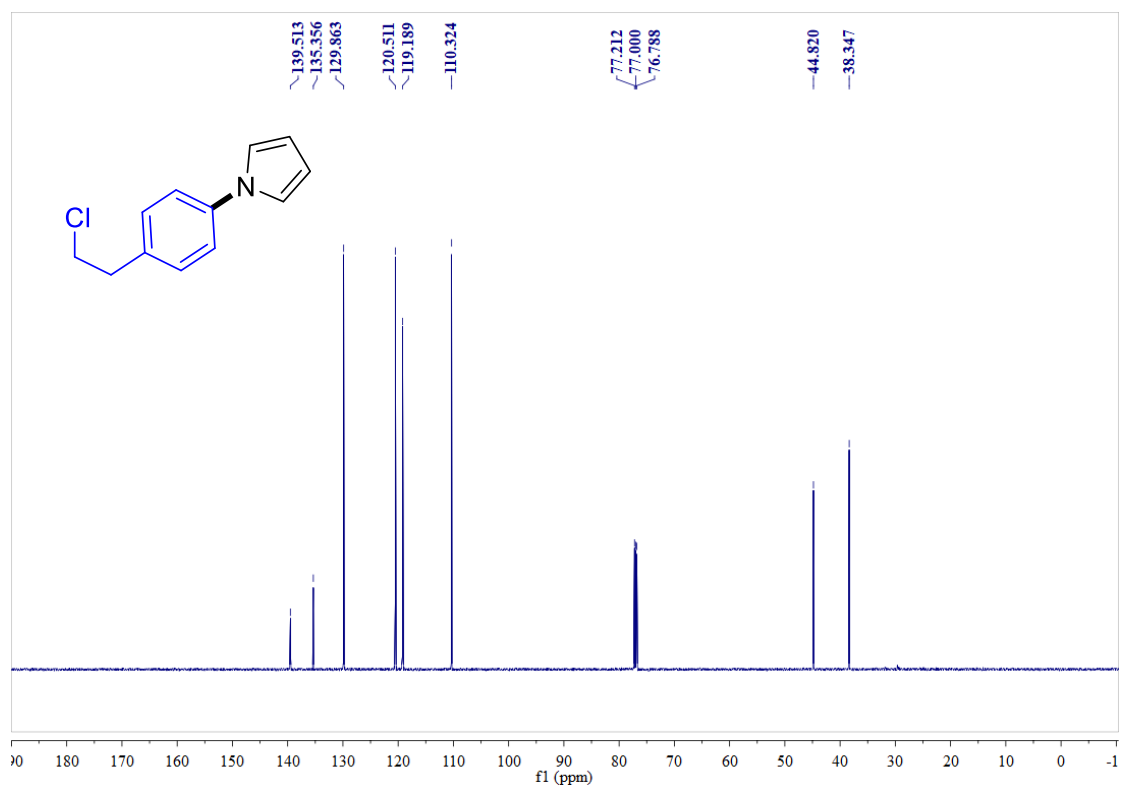

$^1\text{H}$  NMR (600 MHz,  $\text{CDCl}_3$ ) Spectrum of **3n**

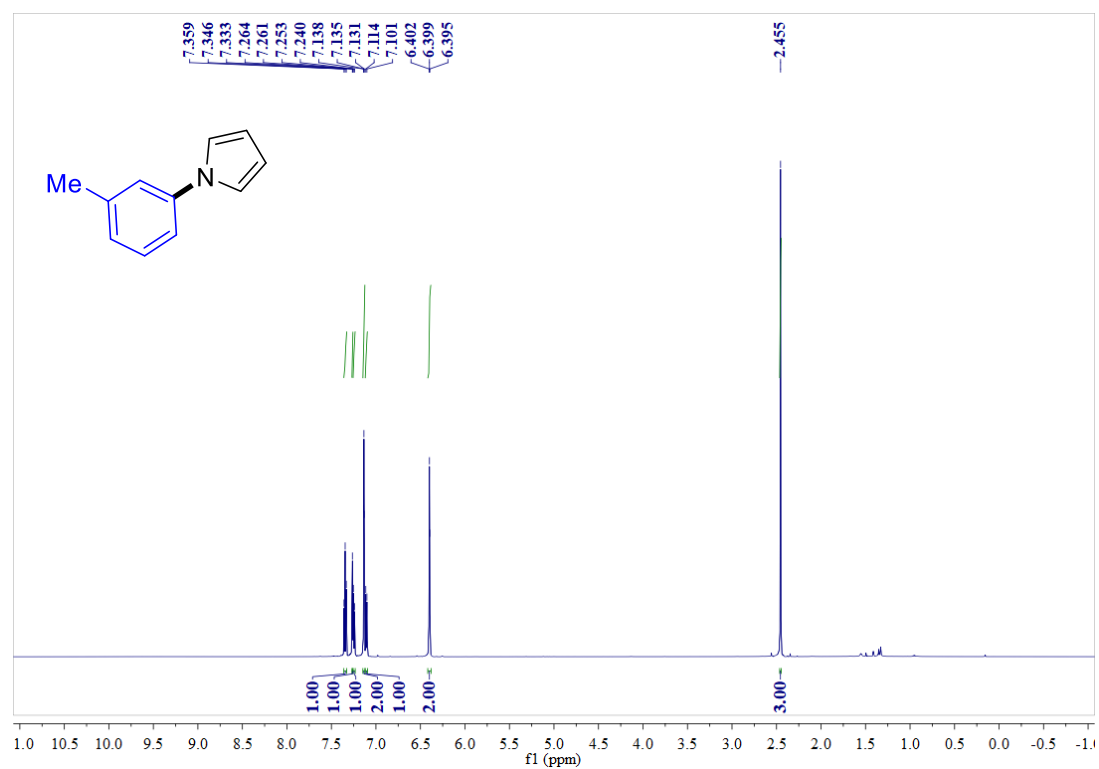

$^{13}\text{C}$  NMR (151 MHz,  $\text{CDCl}_3$ ) Spectrum of **3n**

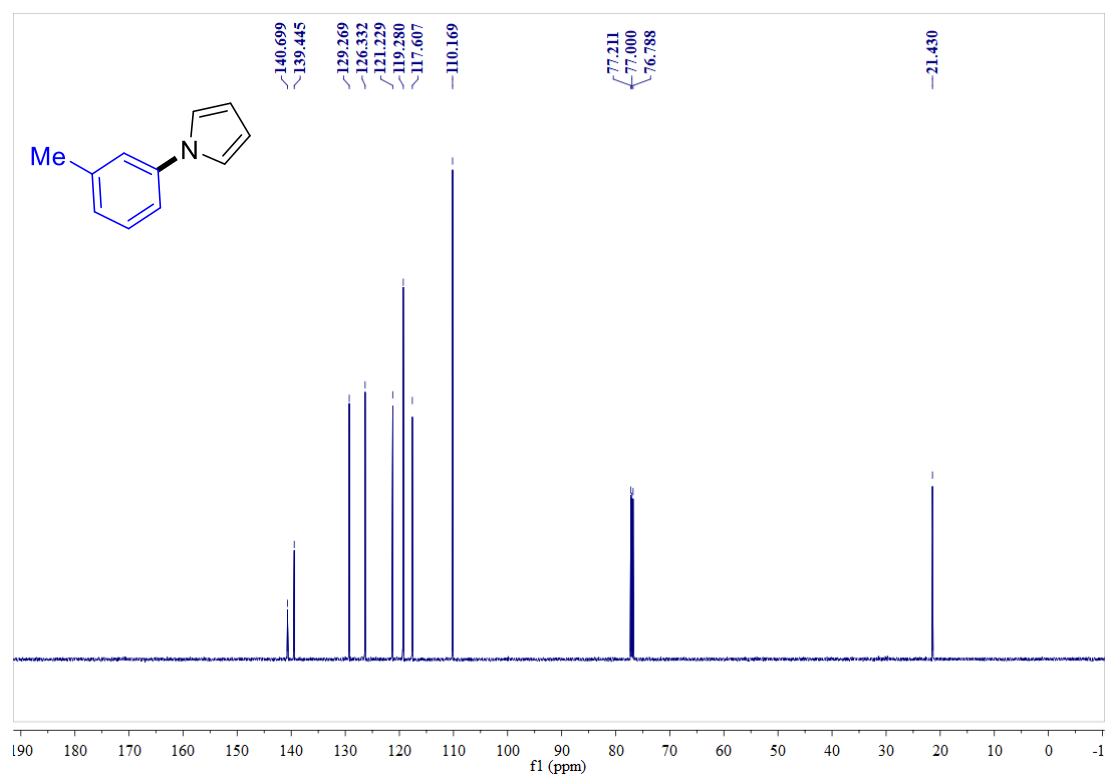

$^1\text{H}$  NMR (600 MHz,  $\text{CDCl}_3$ ) Spectrum of **3o**

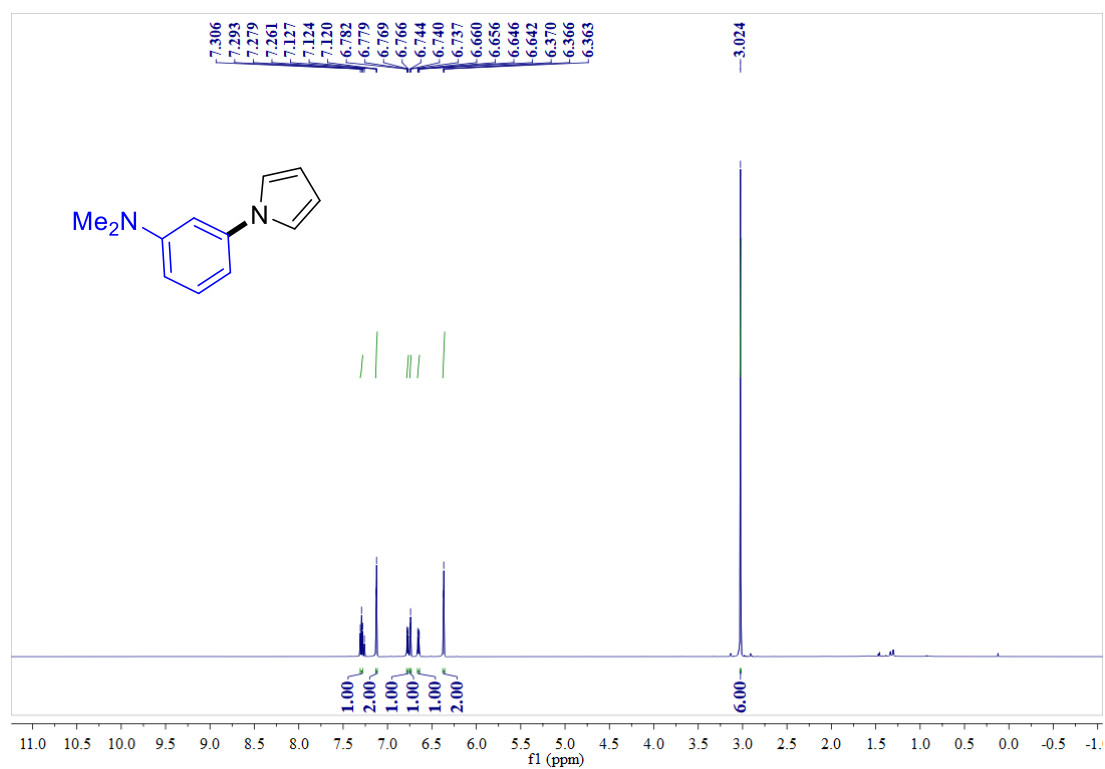

$^{13}\text{C}$  NMR (151 MHz,  $\text{CDCl}_3$ ) Spectrum of **3o**

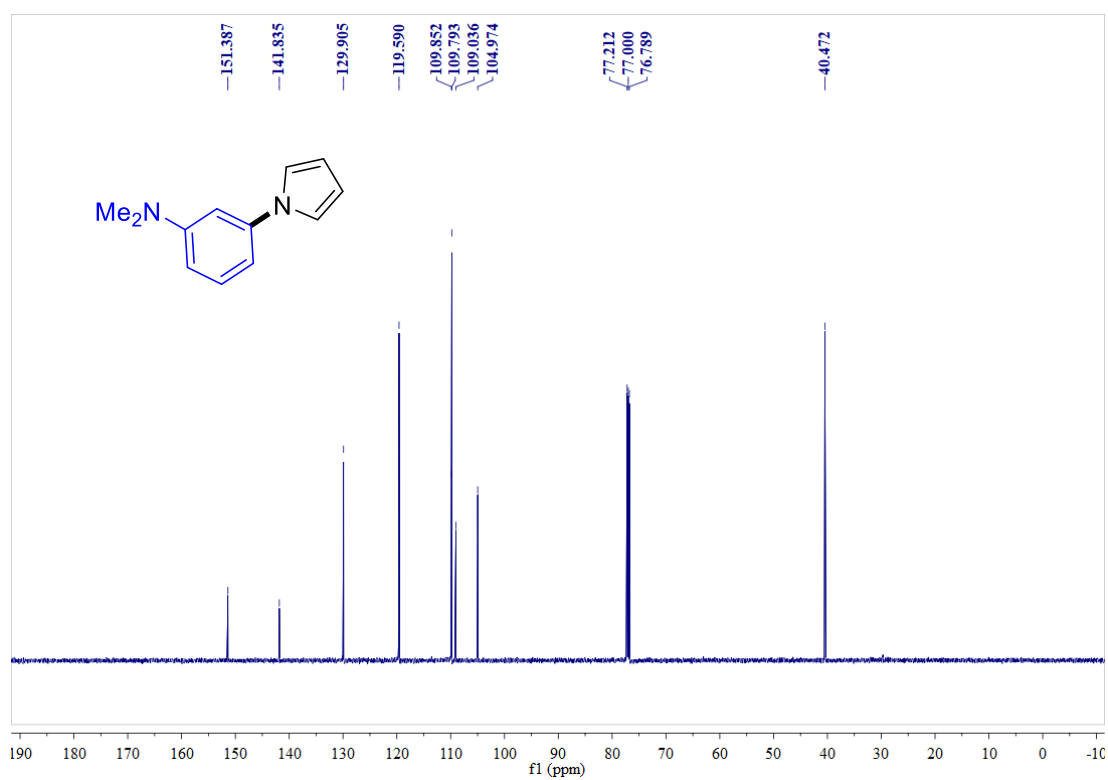



$^1\text{H}$  NMR (600 MHz,  $\text{DMSO}-d_6$ ) Spectrum of **3p**

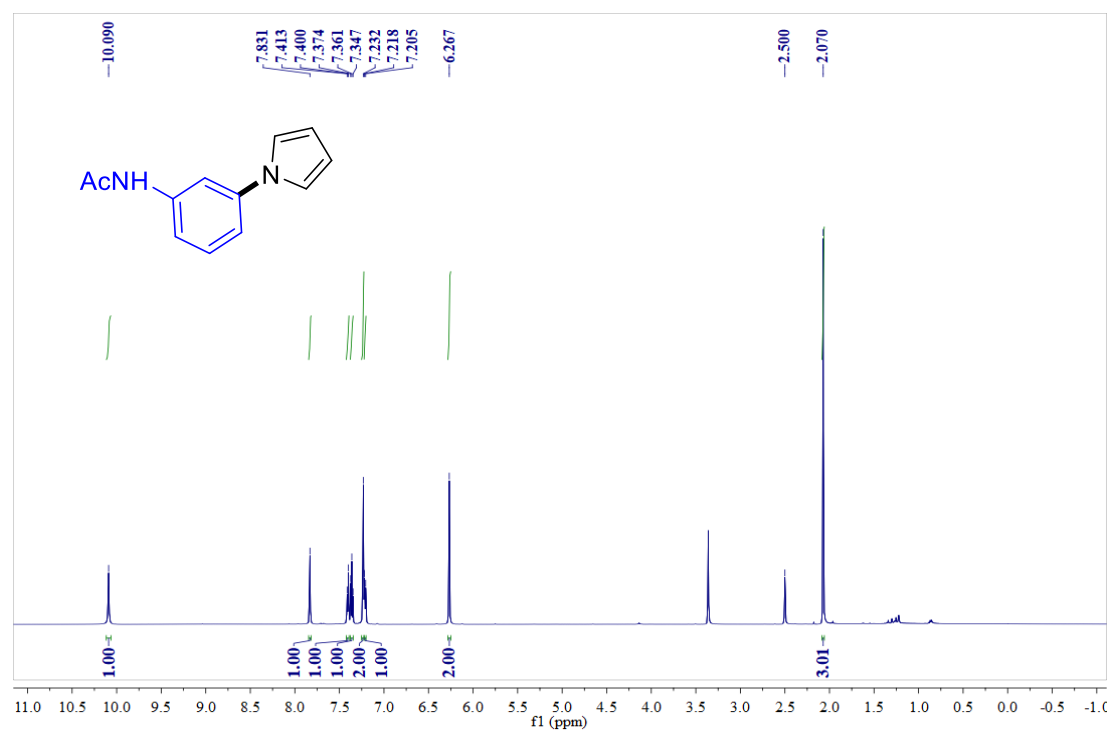

$^{13}\text{C}$  NMR (151 MHz,  $\text{DMSO}-d_6$ ) Spectrum of **3p**

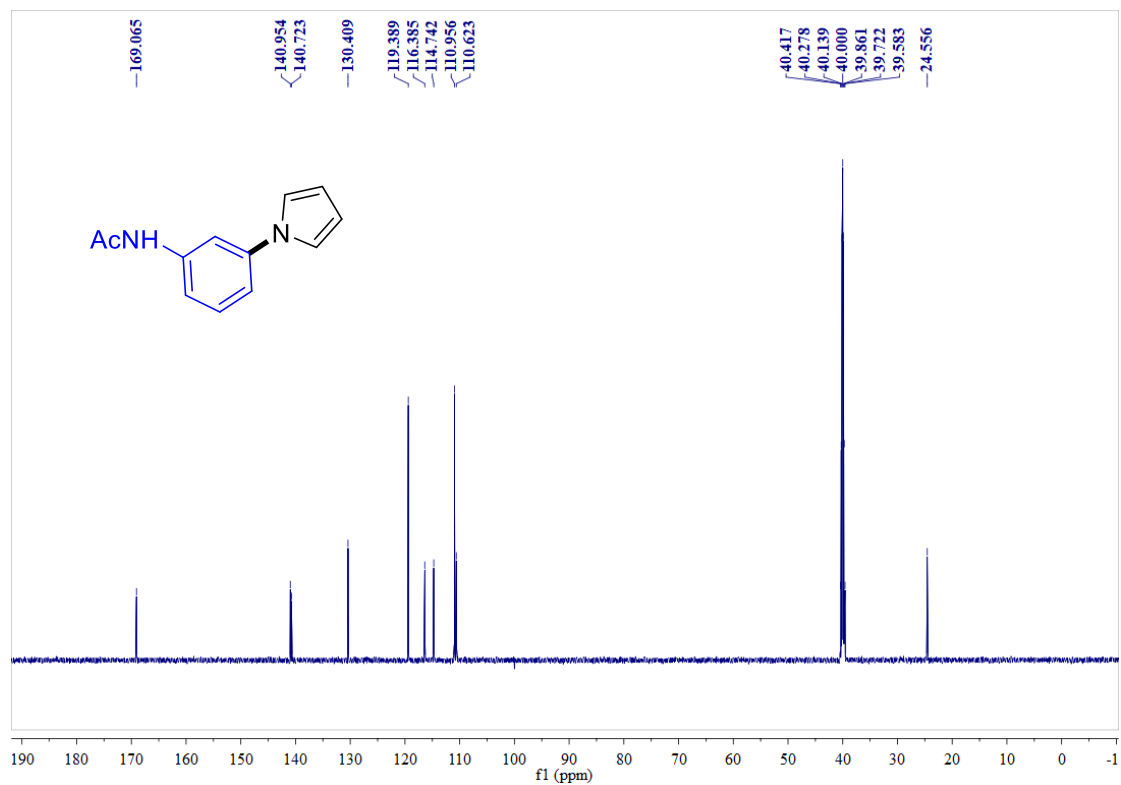

<sup>1</sup>H NMR (600 MHz, CDCl<sub>3</sub>) Spectrum of **3q**

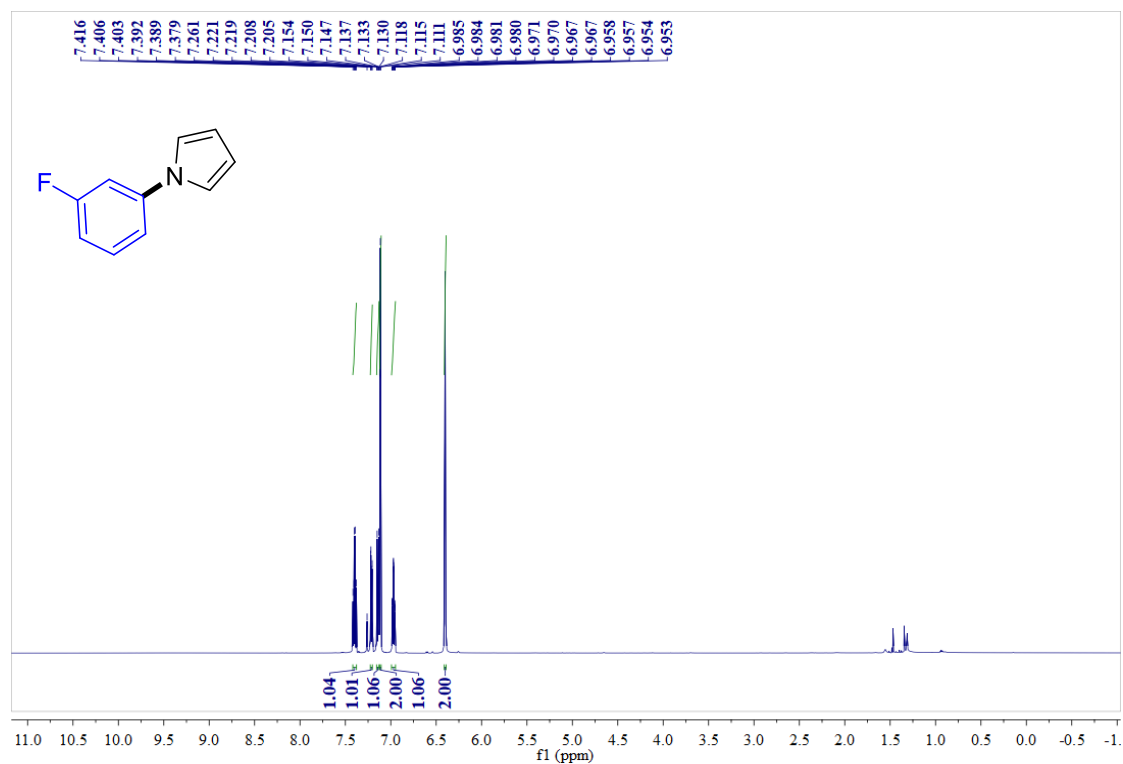

<sup>13</sup>C NMR (151 MHz, CDCl<sub>3</sub>) Spectrum of **3q**

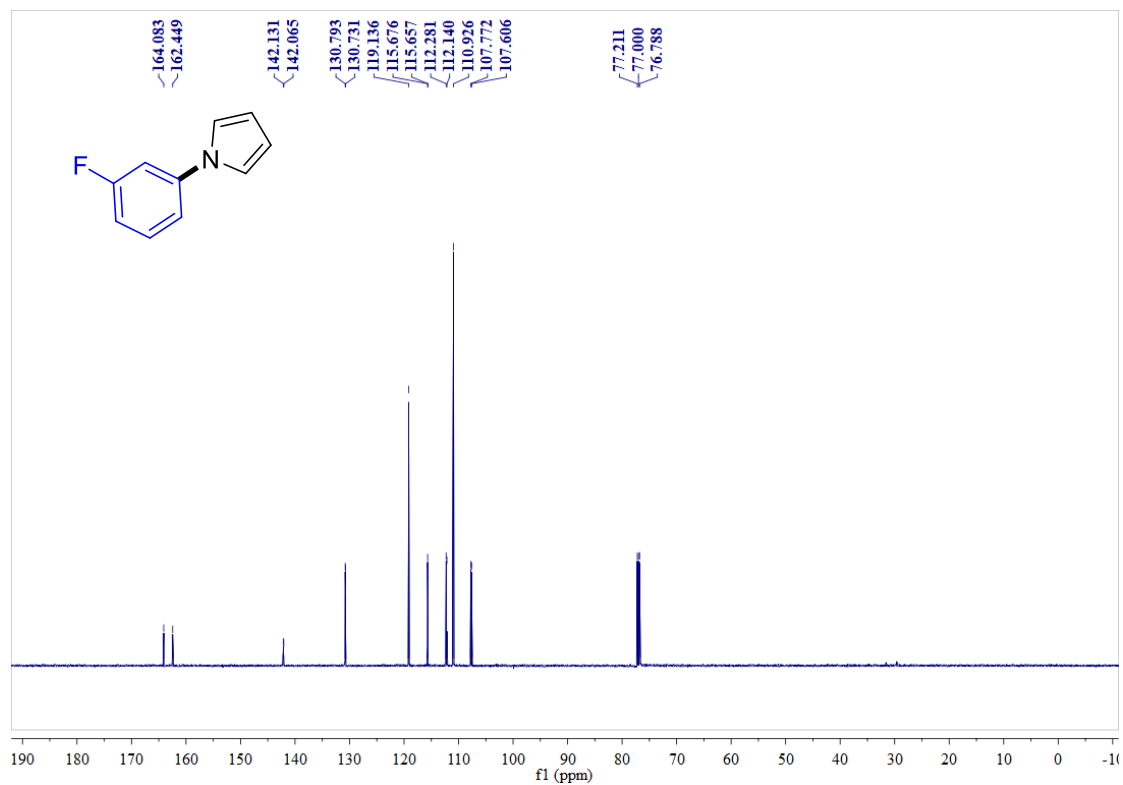

$^{19}\text{F}$  NMR (565 MHz,  $\text{CDCl}_3$ ) Spectrum of **3q**

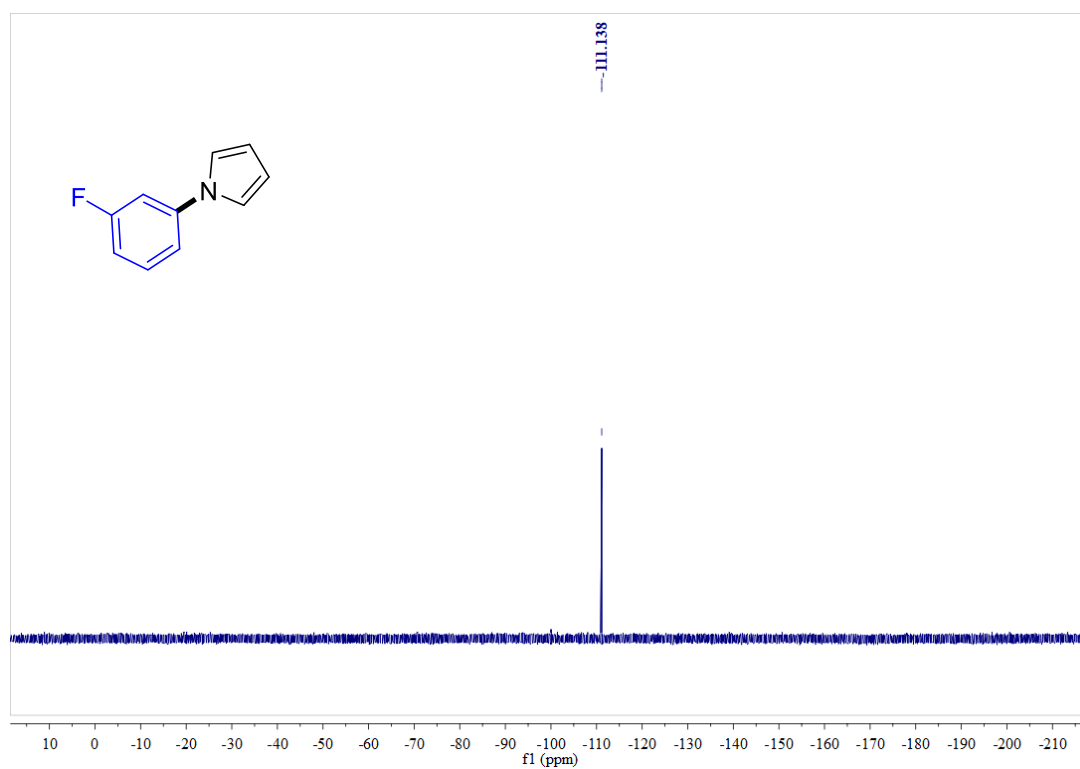

$^1\text{H}$  NMR (600 MHz,  $\text{CDCl}_3$ ) Spectrum of **3r**

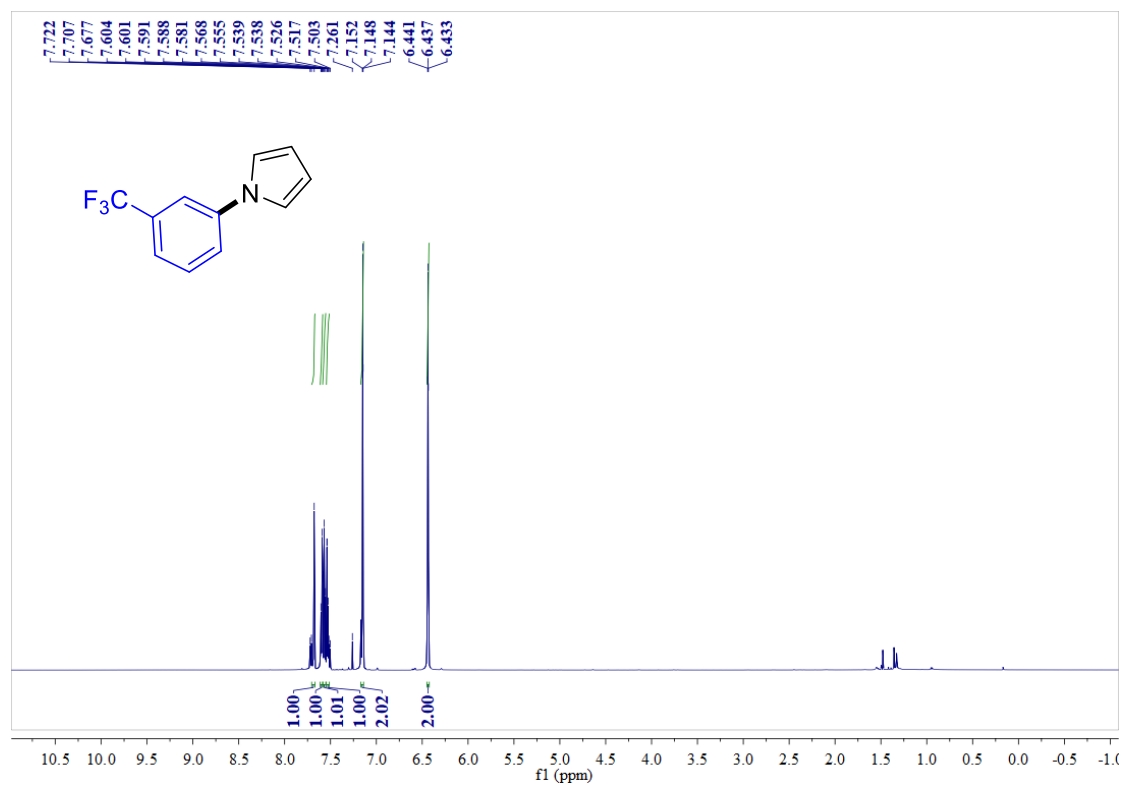

$^{13}\text{C}$  NMR (151 MHz,  $\text{CDCl}_3$ ) Spectrum of **3r**

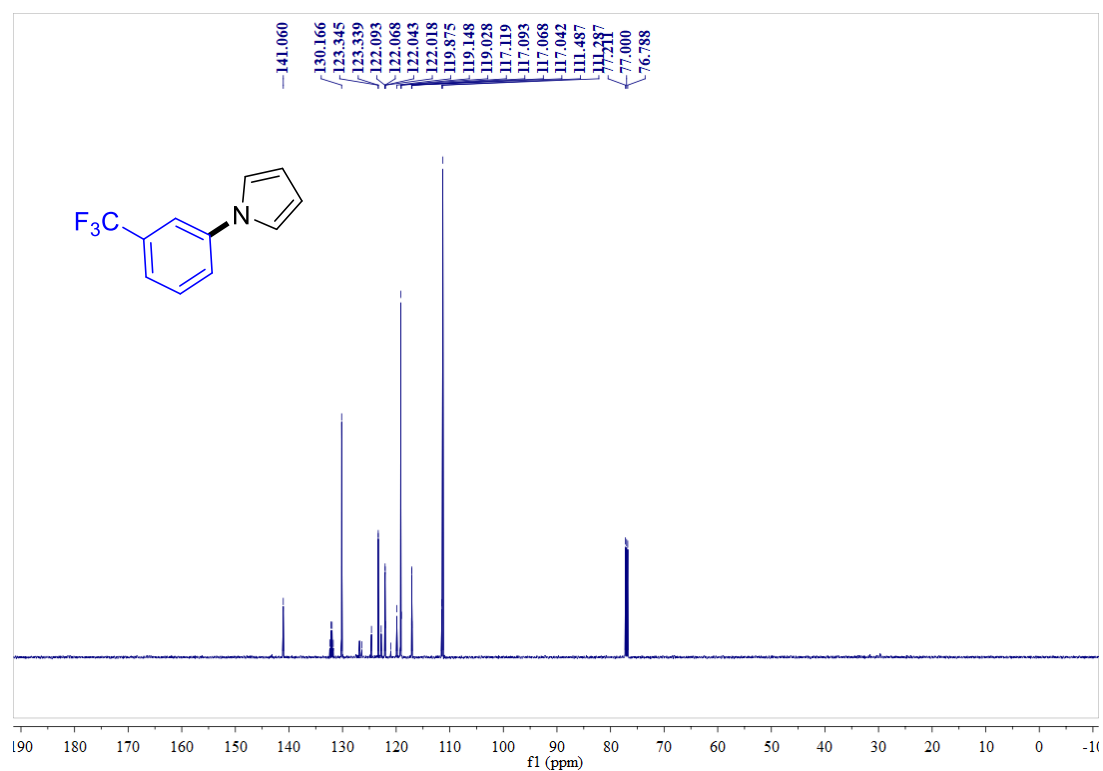

$^{19}\text{F}$  NMR (565 MHz,  $\text{CDCl}_3$ ) Spectrum of **3r**

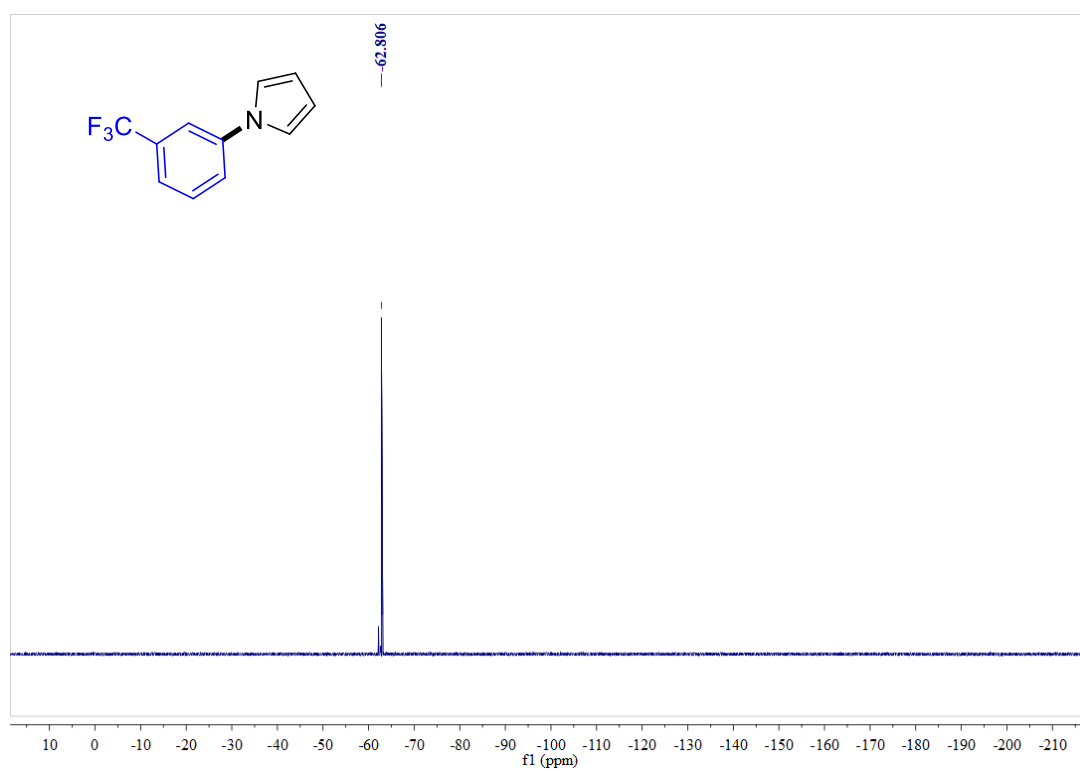

<sup>1</sup>H NMR (600 MHz, CDCl<sub>3</sub>) Spectrum of **3s**

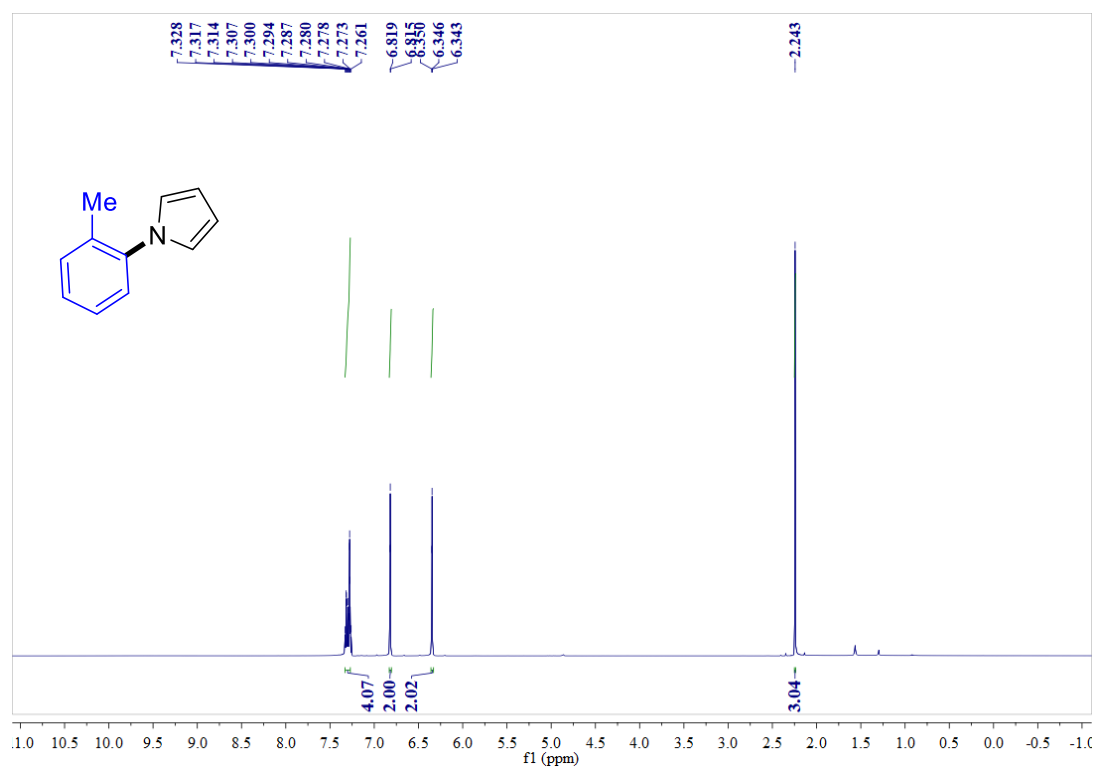

<sup>13</sup>C NMR (151 MHz, CDCl<sub>3</sub>) Spectrum of **3s**

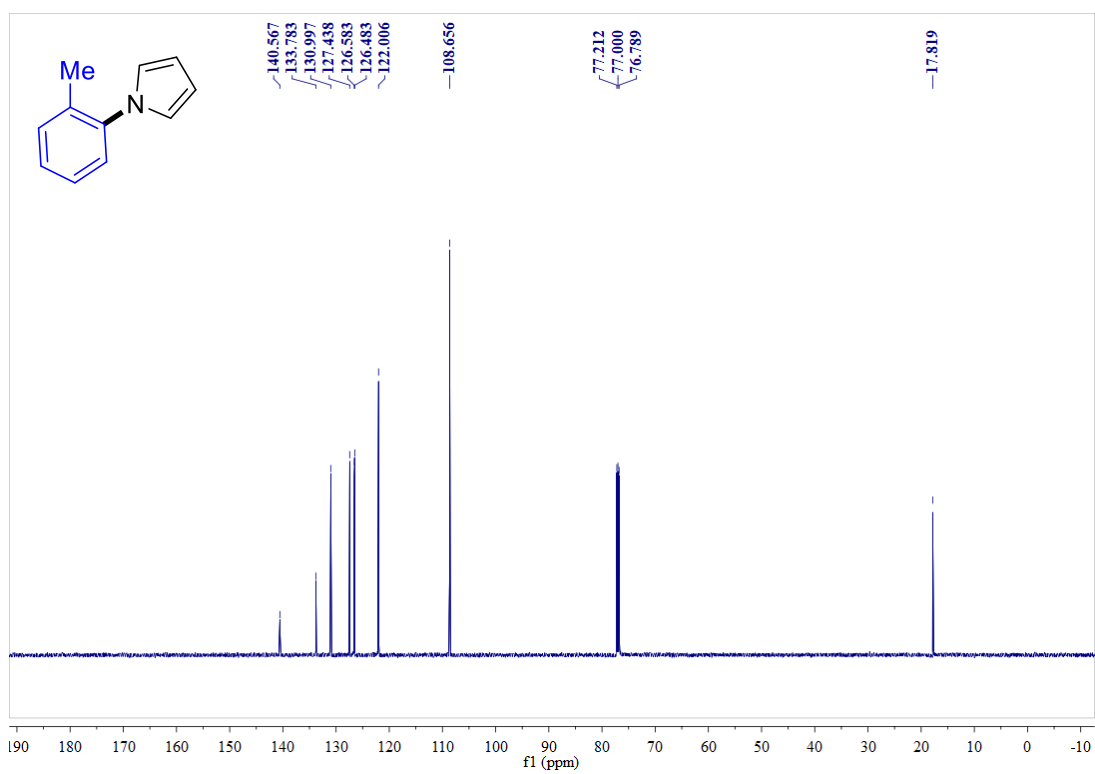

<sup>1</sup>H NMR (600 MHz, CDCl<sub>3</sub>) Spectrum of **3t**

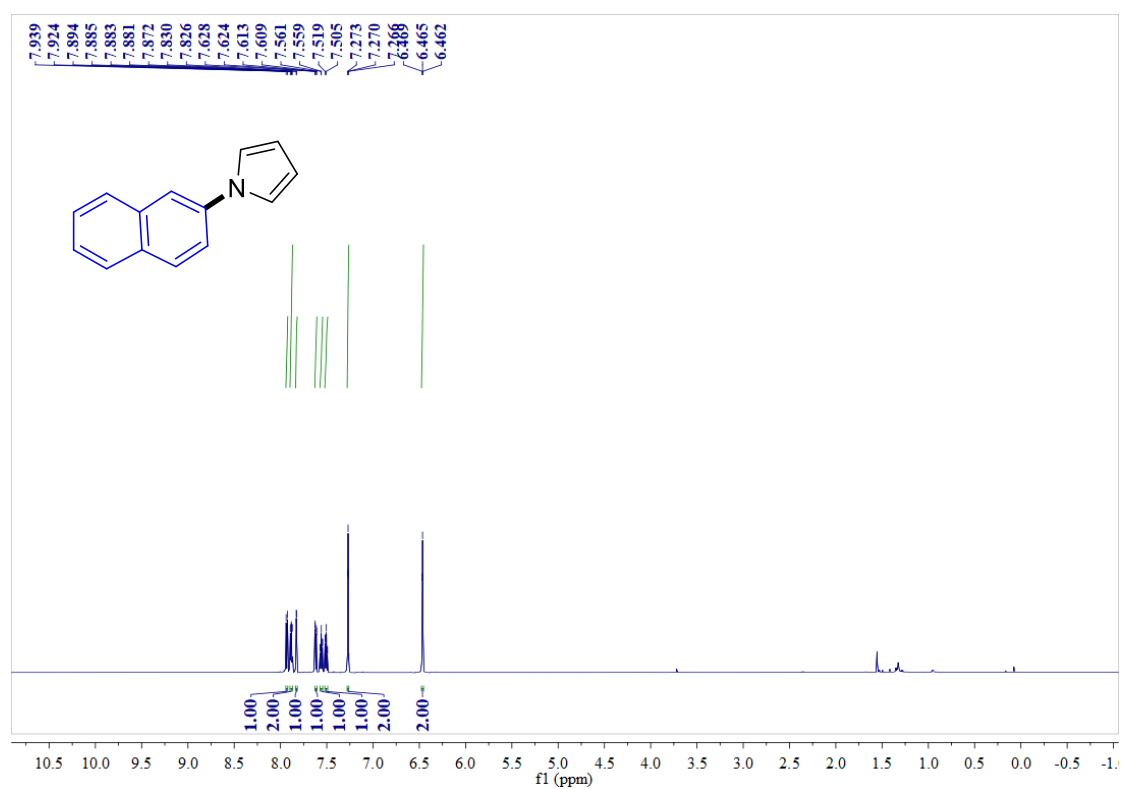

<sup>13</sup>C NMR (151 MHz, CDCl<sub>3</sub>) Spectrum of **3t**

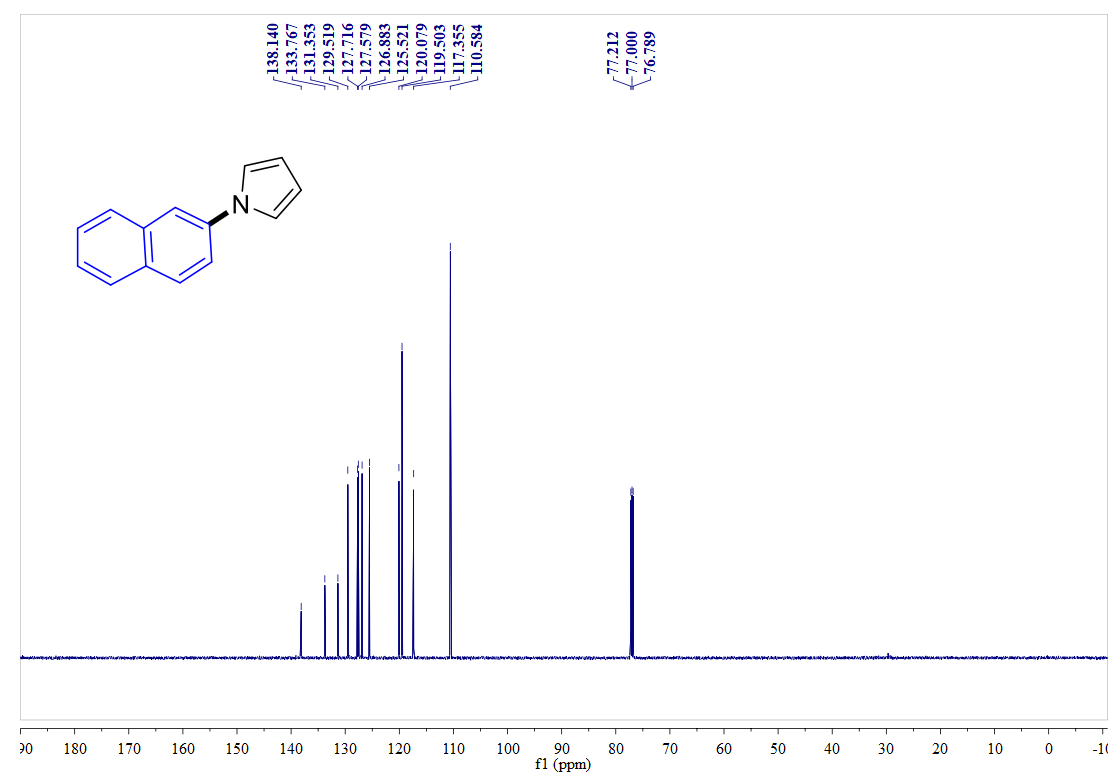

$^1\text{H}$  NMR (600 MHz,  $\text{CDCl}_3$ ) Spectrum of **3u**

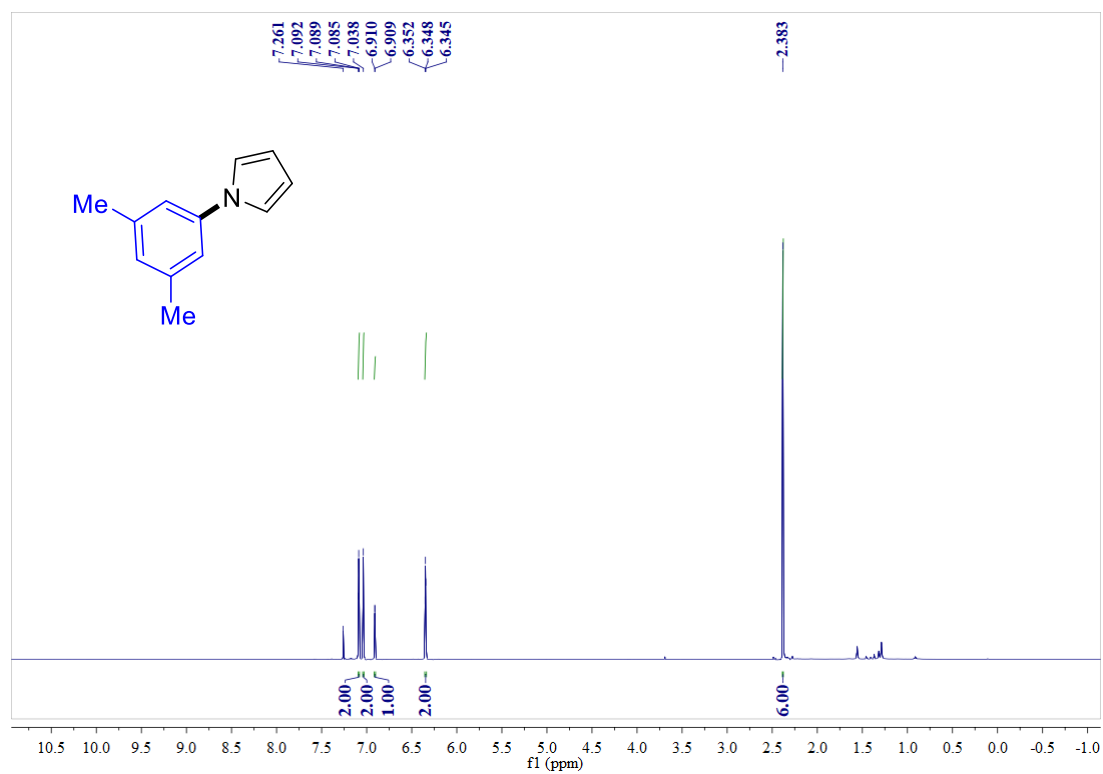

$^{13}\text{C}$  NMR (151 MHz,  $\text{CDCl}_3$ ) Spectrum of **3u**

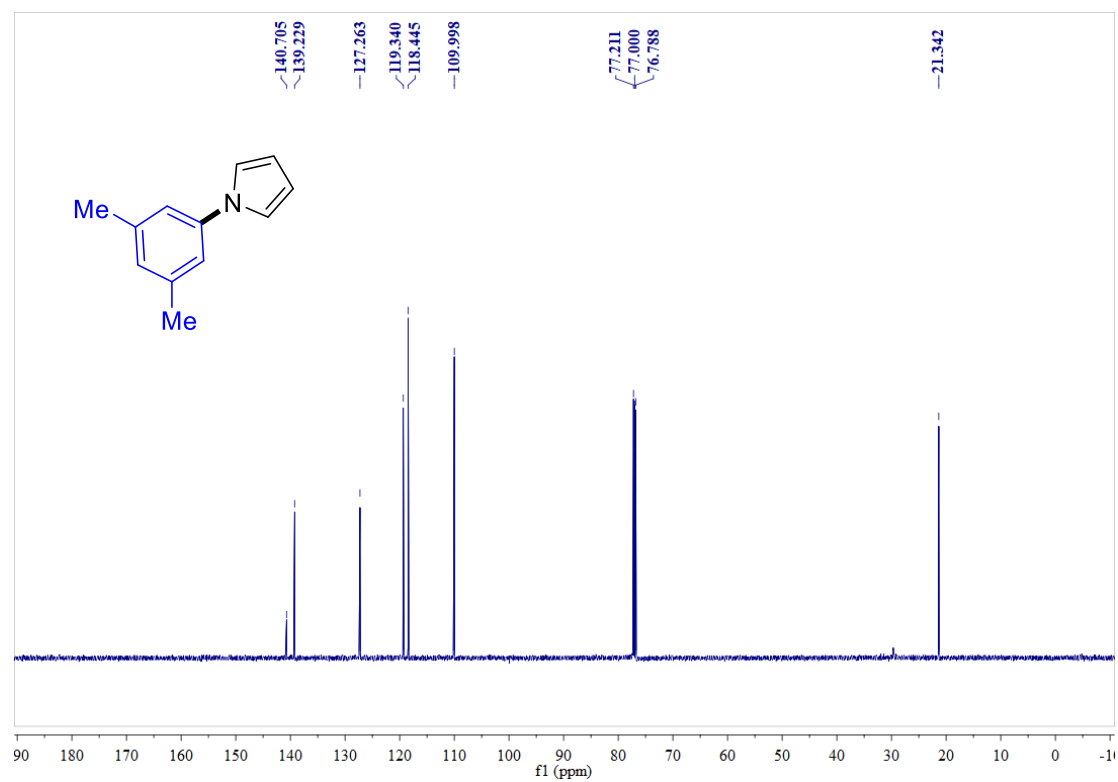

<sup>1</sup>H NMR (600 MHz, CDCl<sub>3</sub>) Spectrum of **3x**

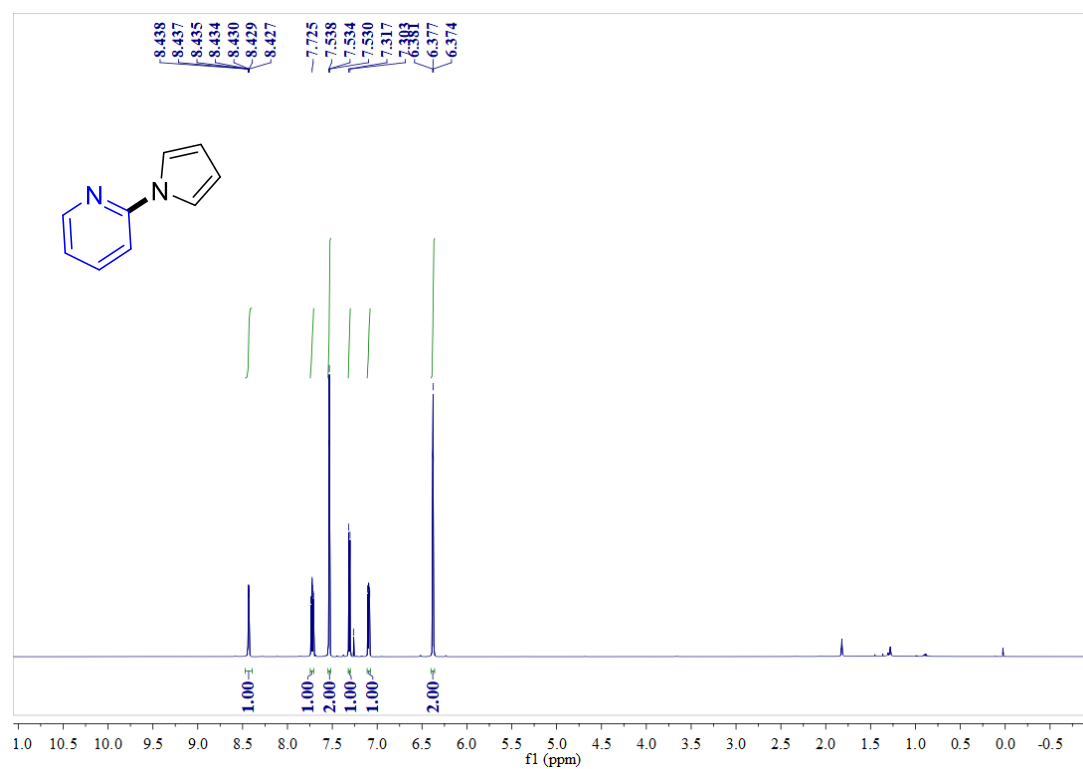

<sup>13</sup>C NMR (151 MHz, CDCl<sub>3</sub>) Spectrum of **3x**

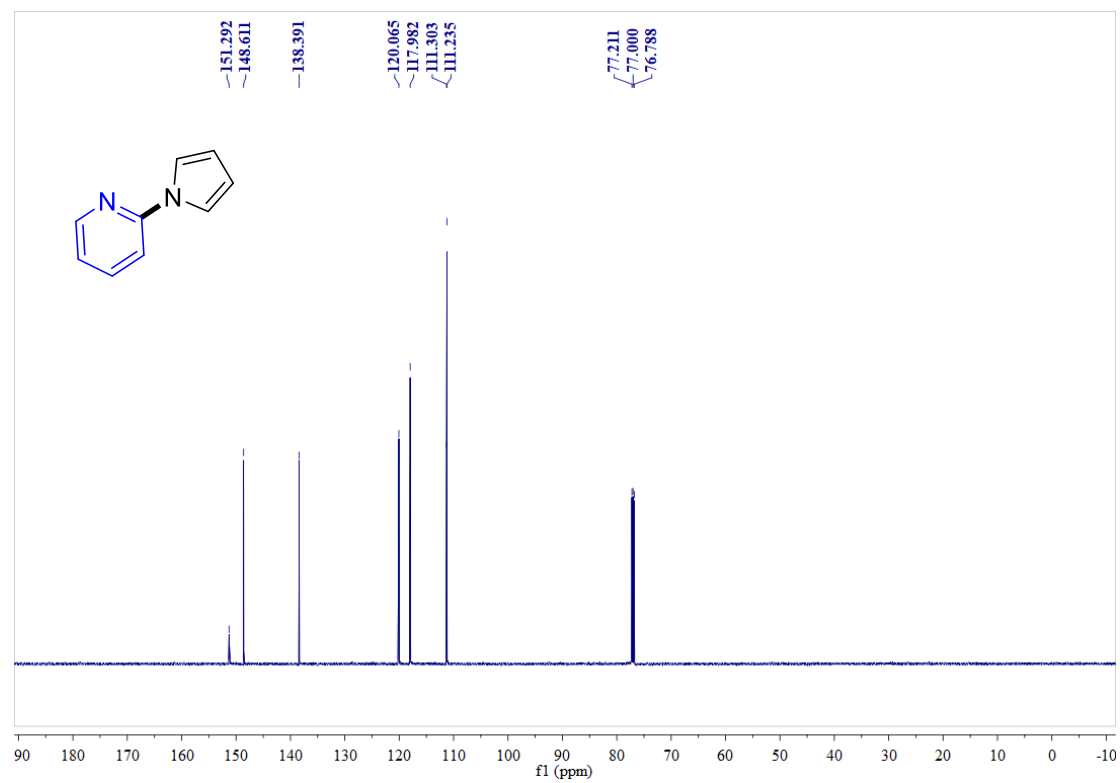



<sup>1</sup>H NMR (600 MHz, CDCl<sub>3</sub>) Spectrum of **3y**

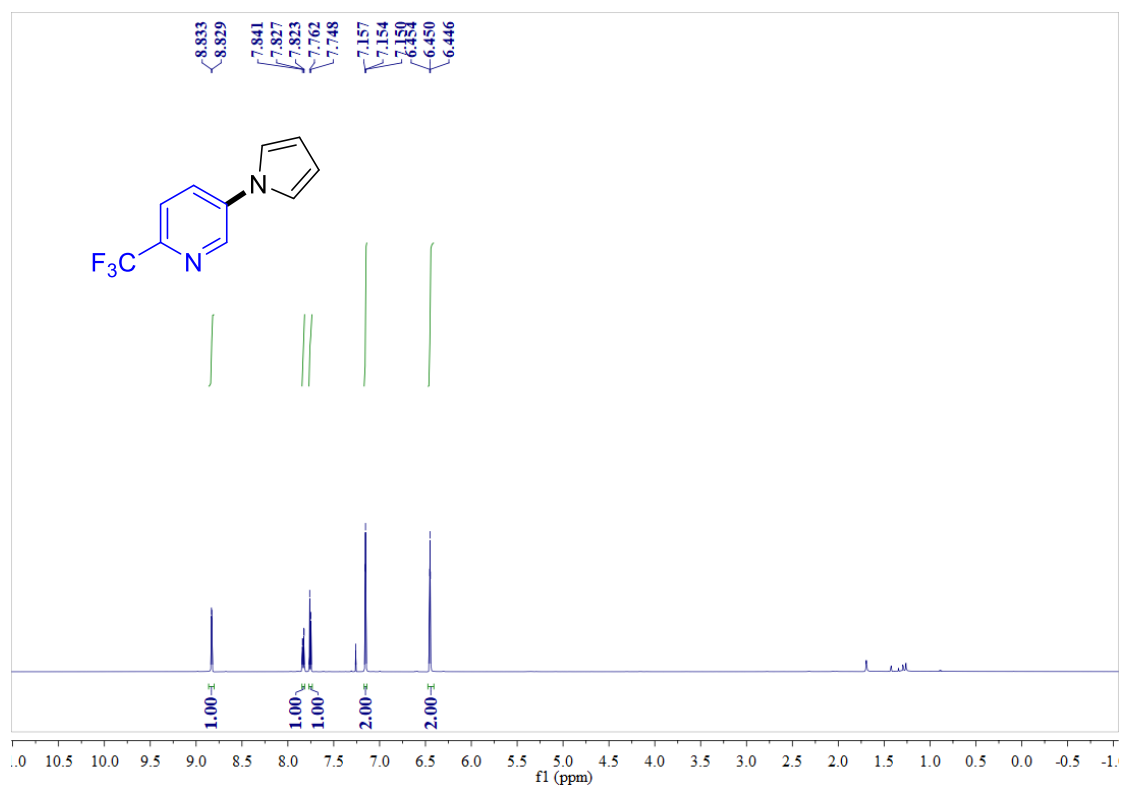

<sup>13</sup>C NMR (151 MHz, CDCl<sub>3</sub>) Spectrum of **3y**

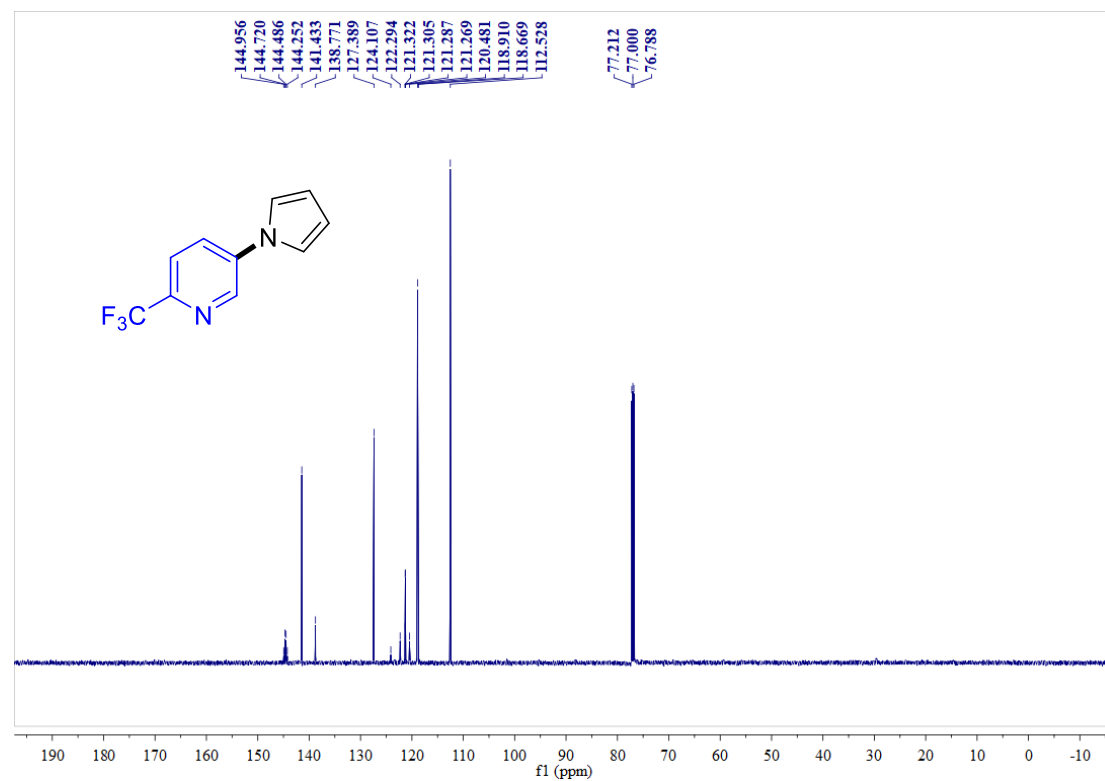

$^{19}\text{F}$  NMR (565 MHz,  $\text{CDCl}_3$ ) Spectrum of **3y**

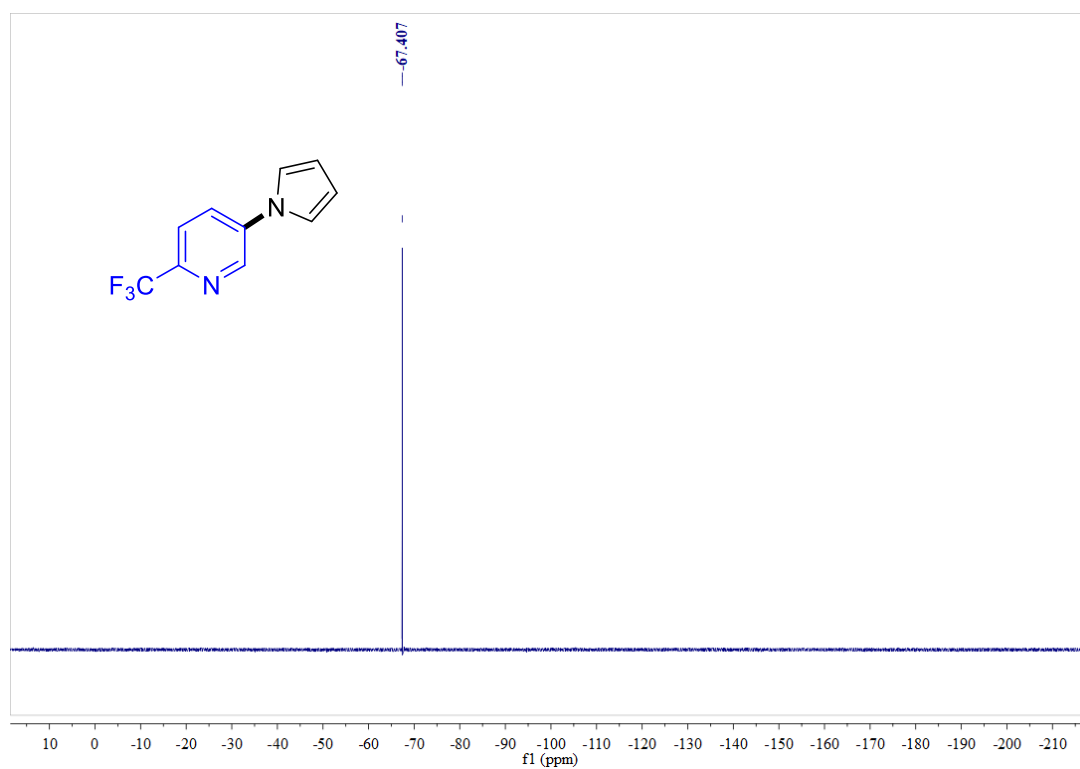

$^1\text{H}$  NMR (600 MHz,  $\text{CDCl}_3$ ) Spectrum of **3z**

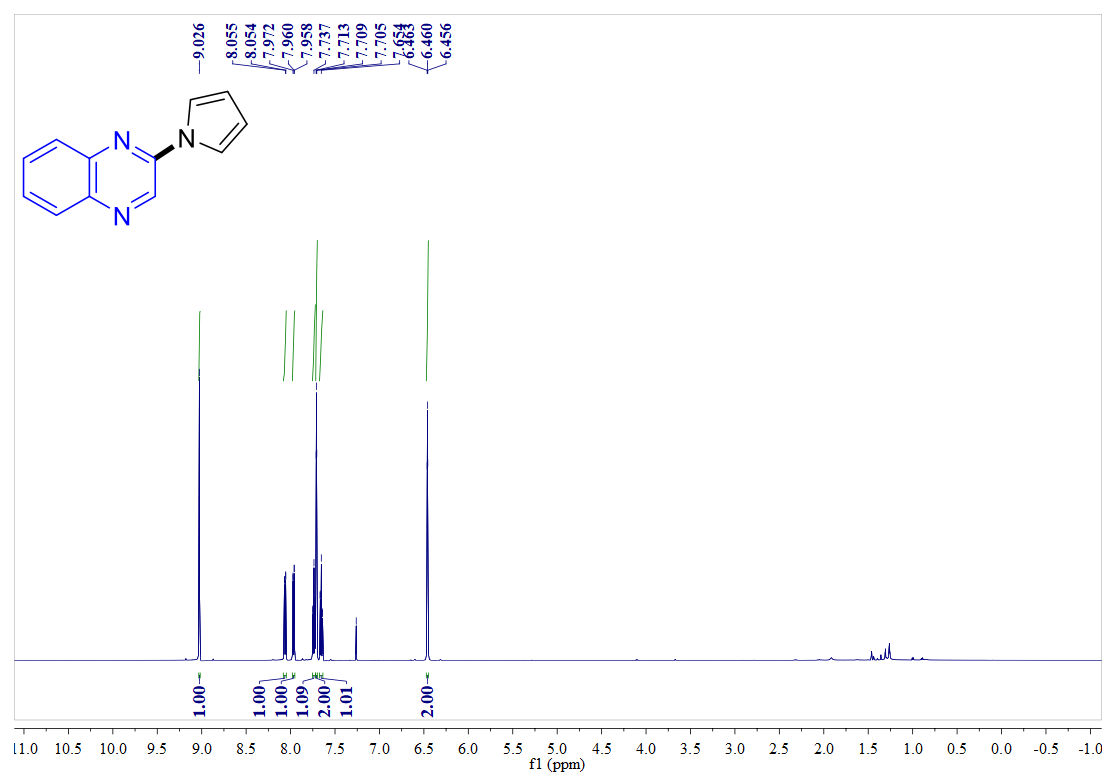

$^{13}\text{C}$  NMR (151 MHz,  $\text{CDCl}_3$ ) Spectrum of **3z**

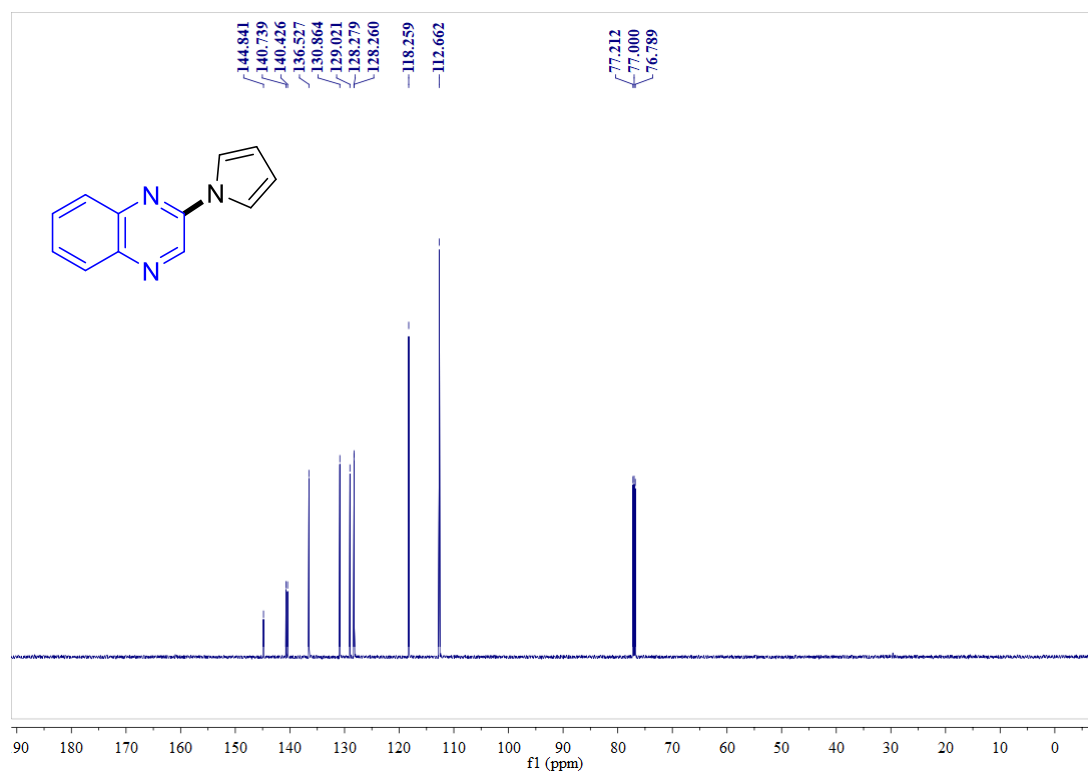

$^1\text{H}$  NMR (600 MHz,  $\text{CDCl}_3$ ) Spectrum of **3aa**

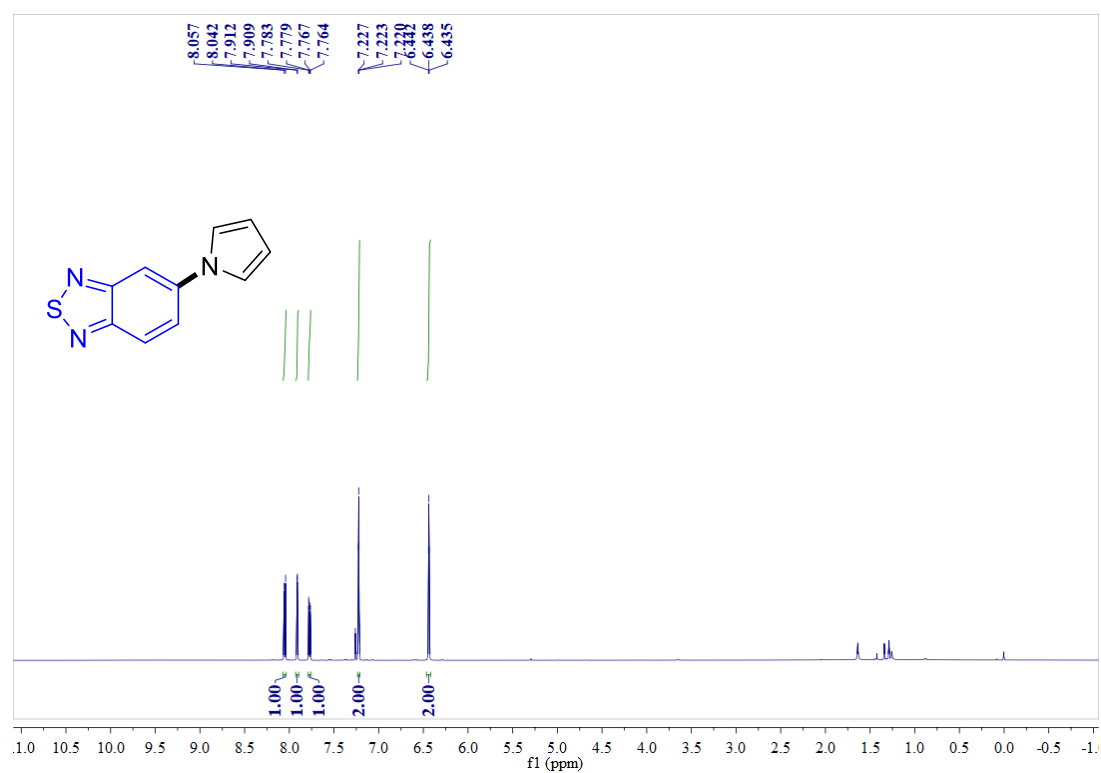

$^{13}\text{C}$  NMR (151 MHz,  $\text{CDCl}_3$ ) Spectrum of **3aa**

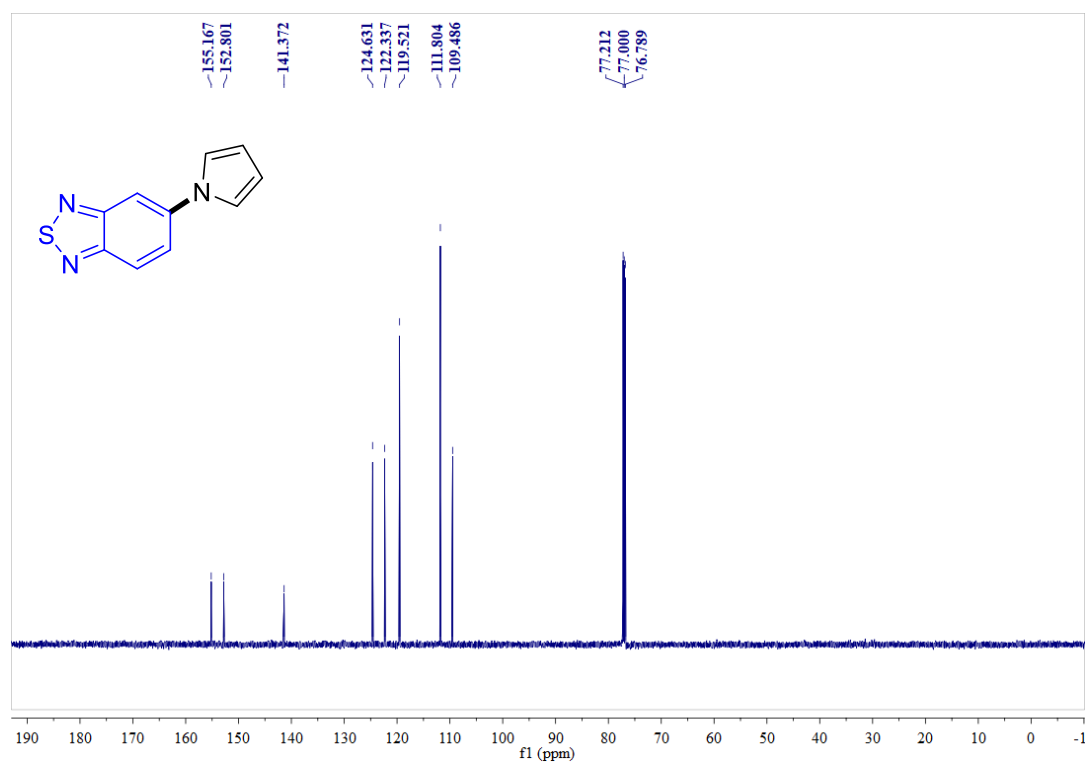

$^1\text{H}$  NMR (600 MHz,  $\text{CDCl}_3$ ) Spectrum of **3ab**

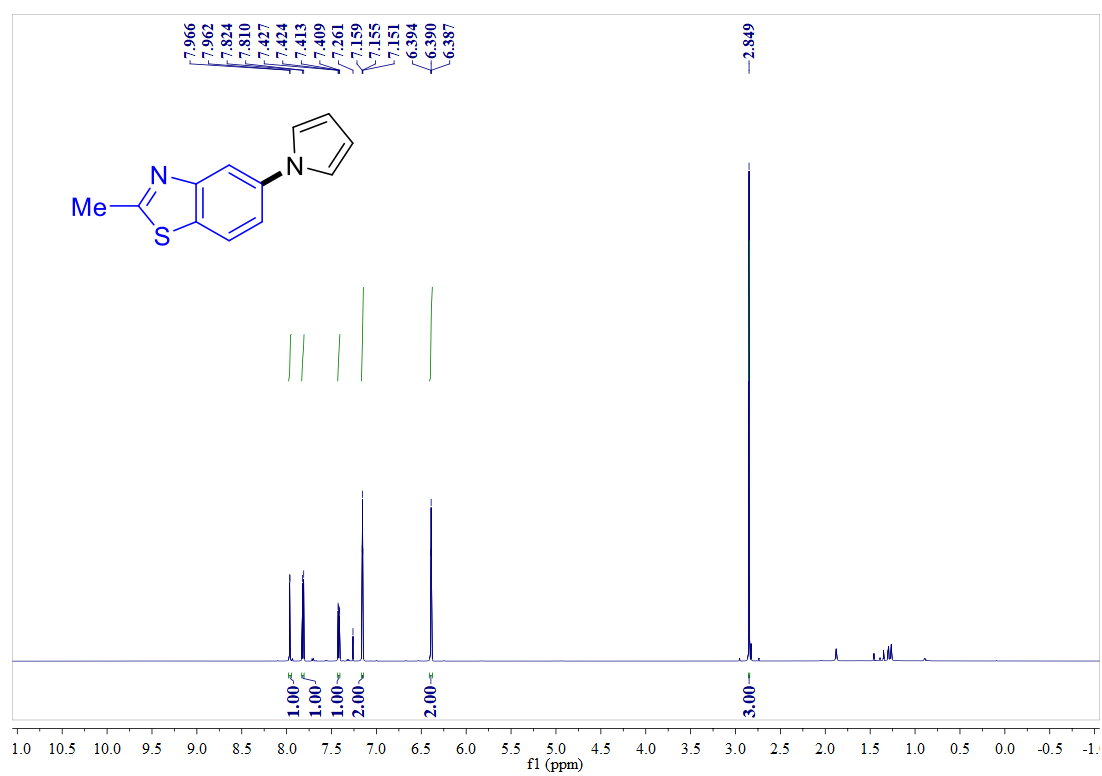

$^{13}\text{C}$  NMR (151 MHz,  $\text{CDCl}_3$ ) Spectrum of **3ab**

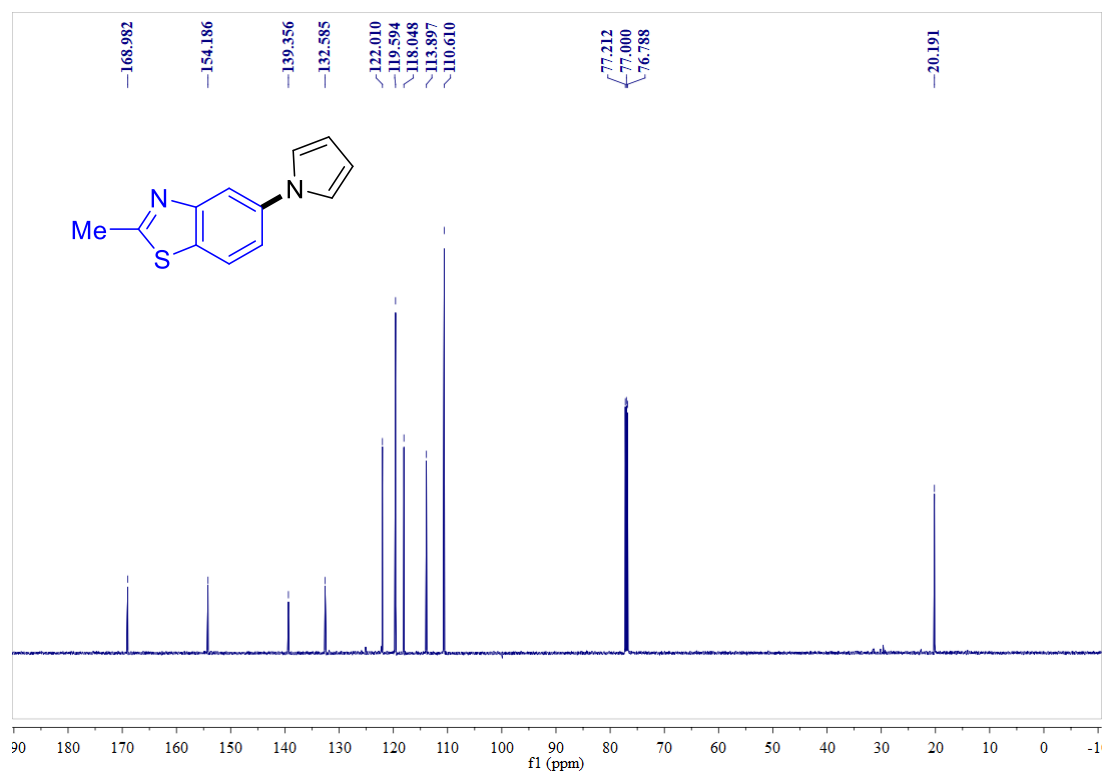

$^1\text{H}$  NMR (600 MHz,  $\text{CDCl}_3$ ) Spectrum of **4a**

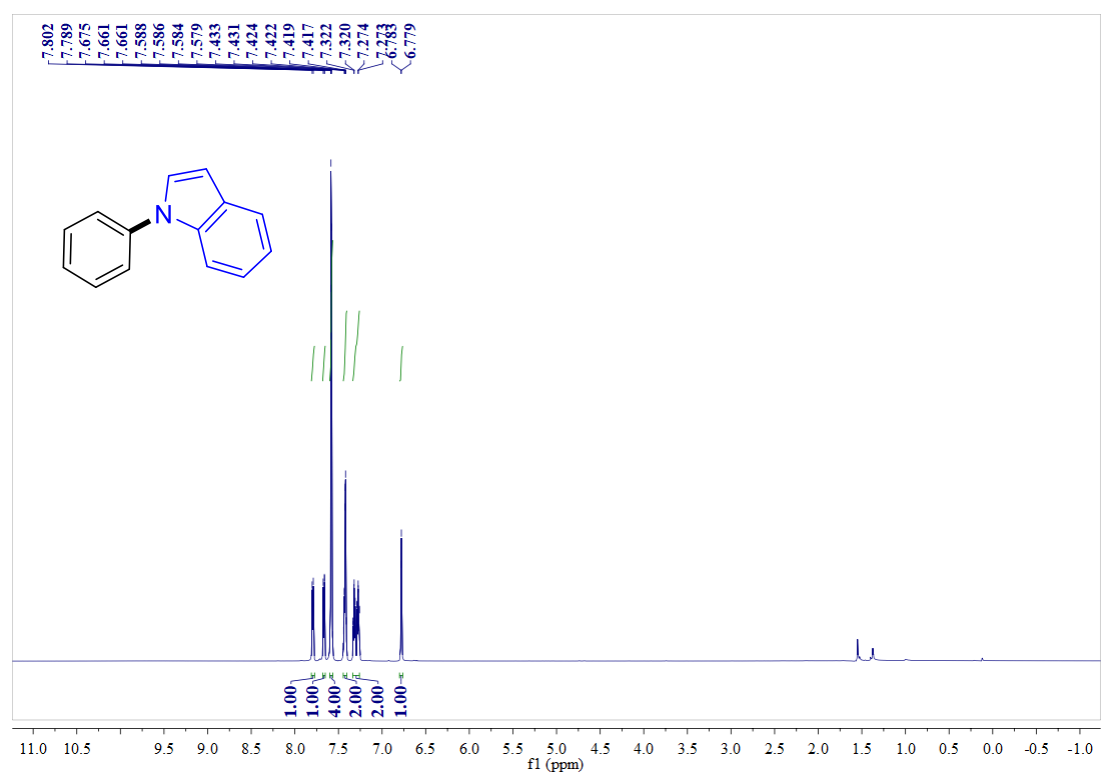

$^{13}\text{C}$  NMR (151 MHz,  $\text{CDCl}_3$ ) Spectrum of **4a**

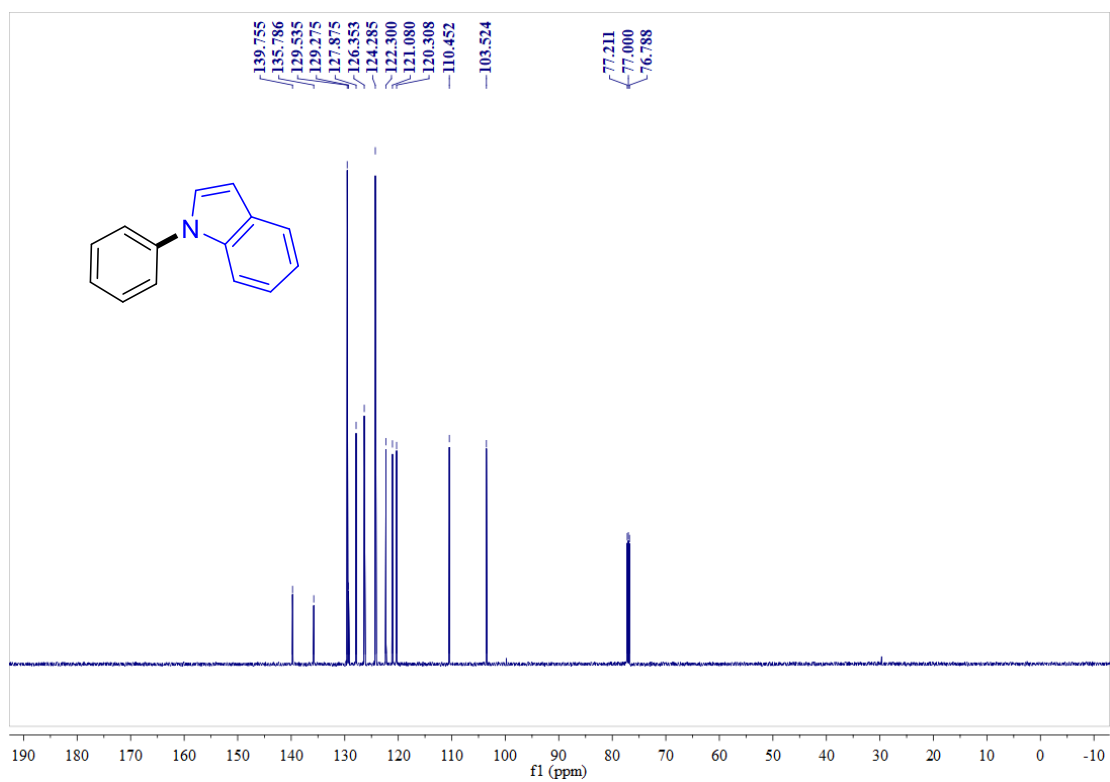

$^1\text{H}$  NMR (600 MHz,  $\text{CDCl}_3$ ) Spectrum of **4b**

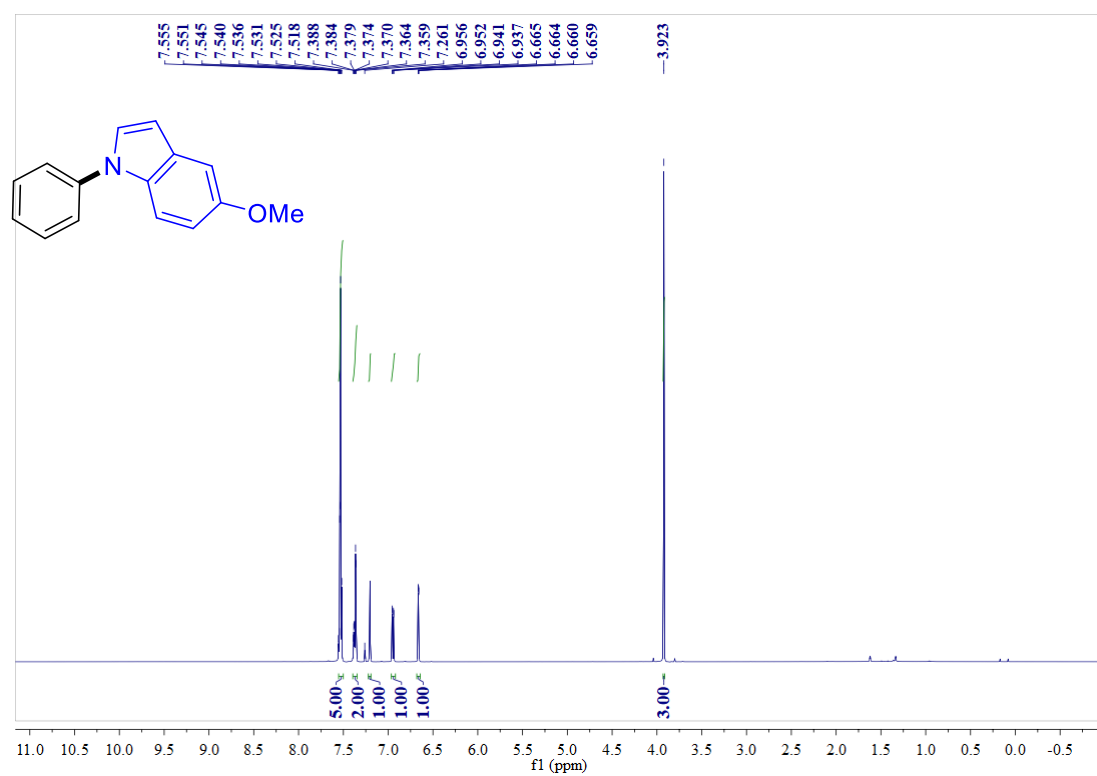

$^{13}\text{C}$  NMR (151 MHz,  $\text{CDCl}_3$ ) Spectrum of **4b**

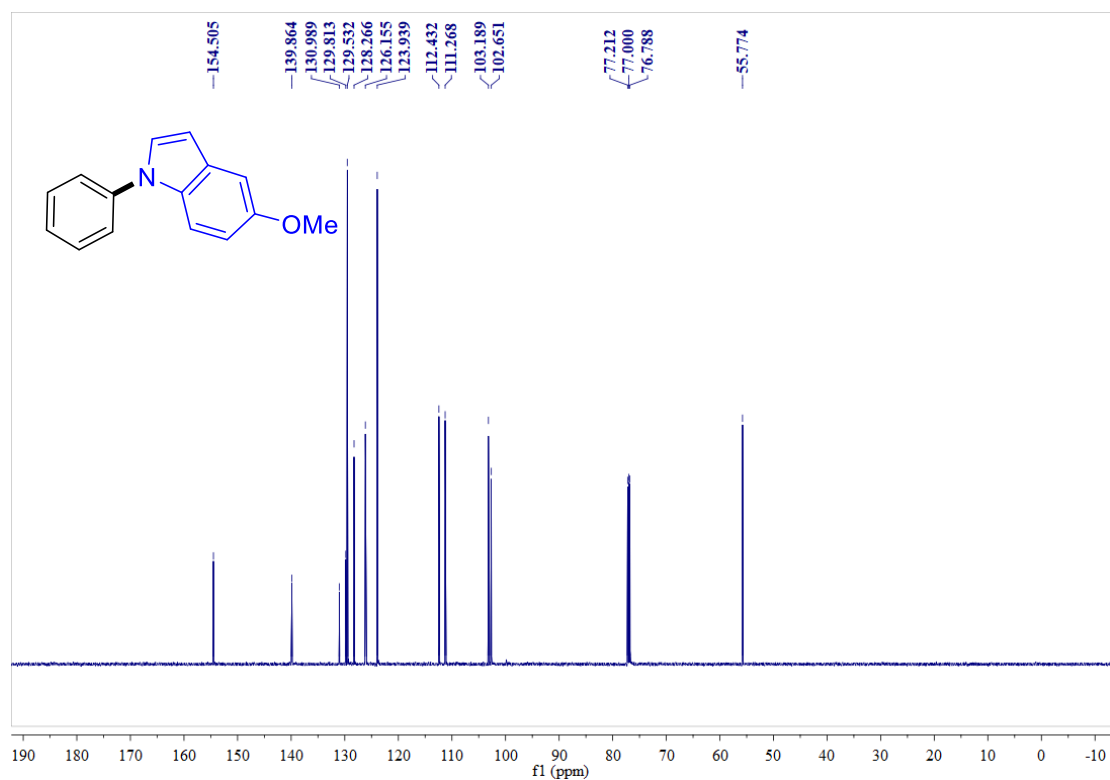

$^1\text{H}$  NMR (600 MHz,  $\text{CDCl}_3$ ) Spectrum of **4c**

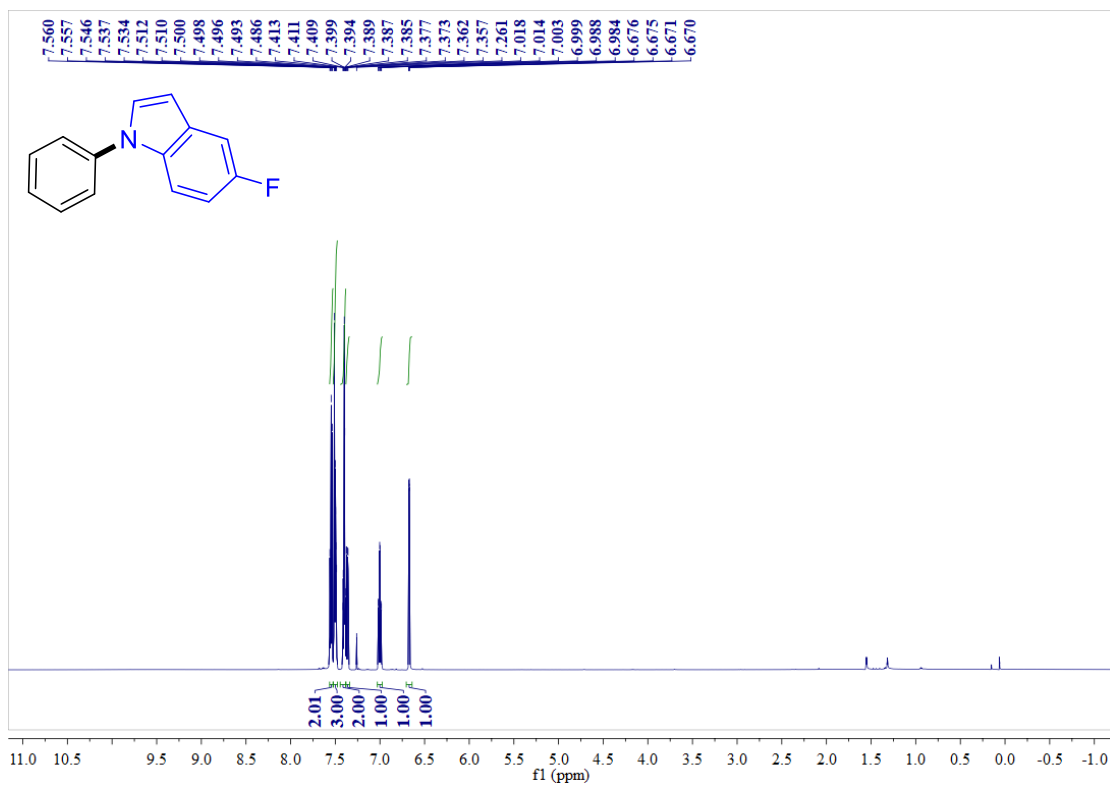

$^{13}\text{C}$  NMR (151 MHz,  $\text{CDCl}_3$ ) Spectrum of **4c**

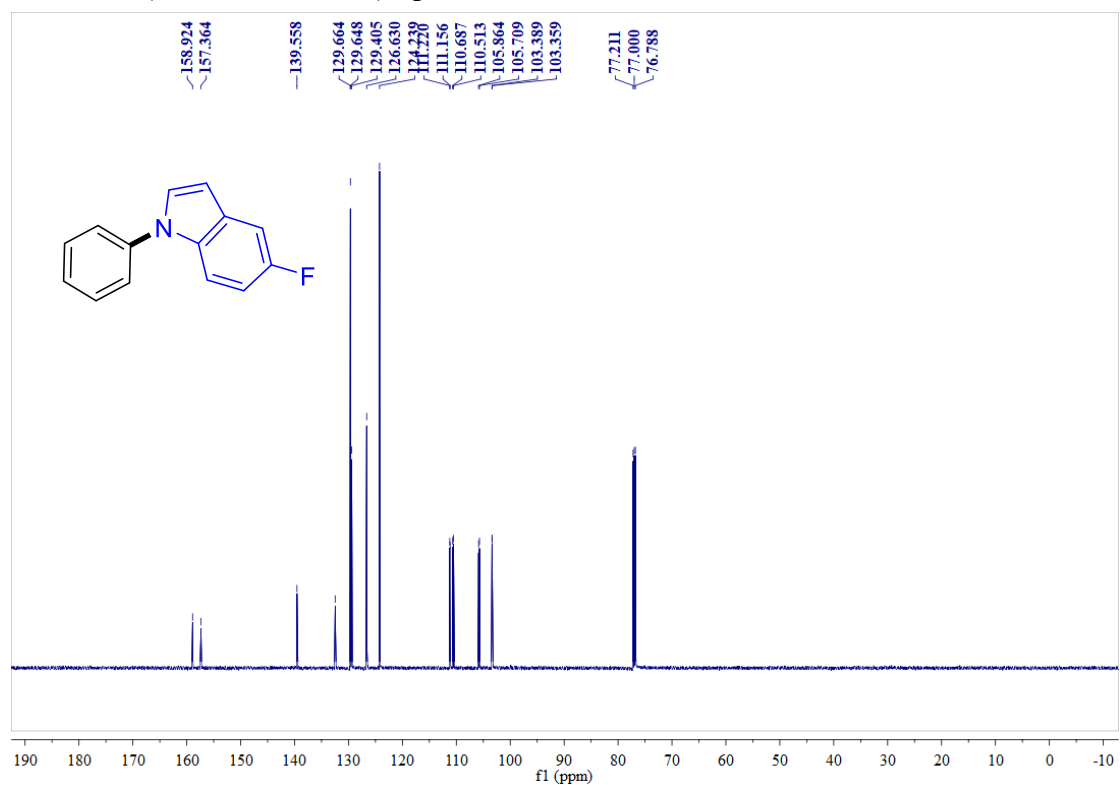

$^{19}\text{F}$  NMR (565 MHz,  $\text{CDCl}_3$ ) Spectrum of **4c**

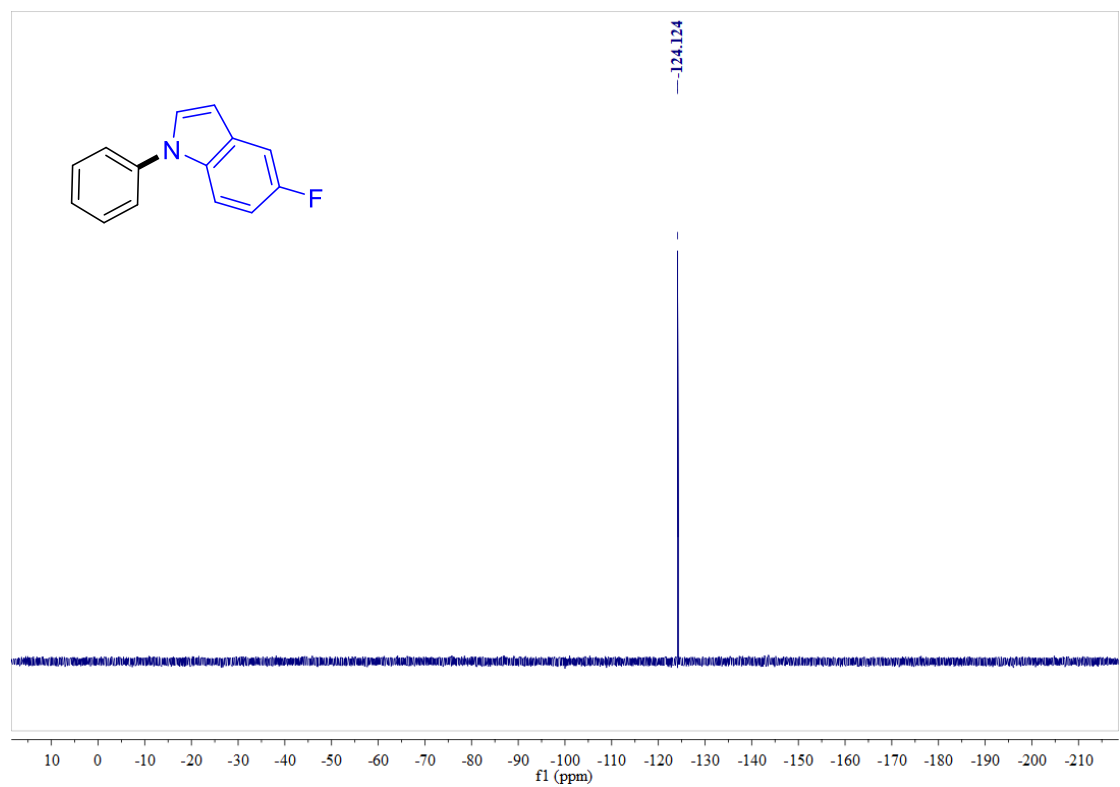



<sup>1</sup>H NMR (600 MHz, CDCl<sub>3</sub>) Spectrum of **4d**

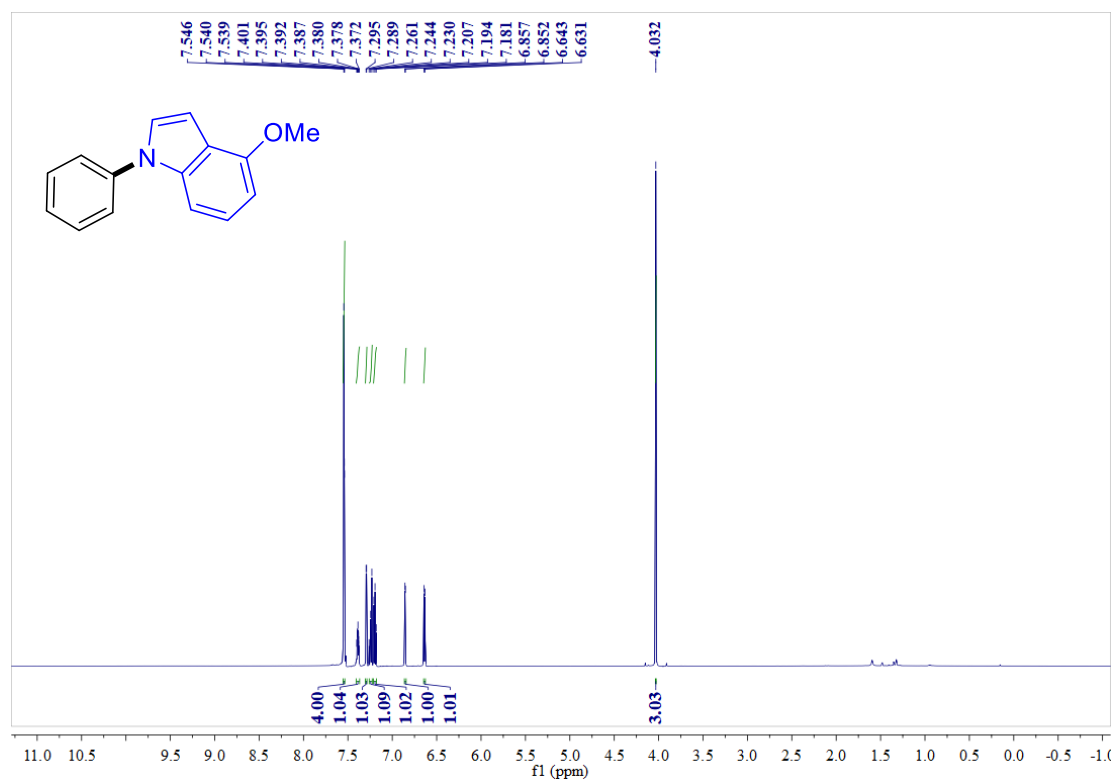

<sup>13</sup>C NMR (151 MHz, CDCl<sub>3</sub>) Spectrum of **4d**

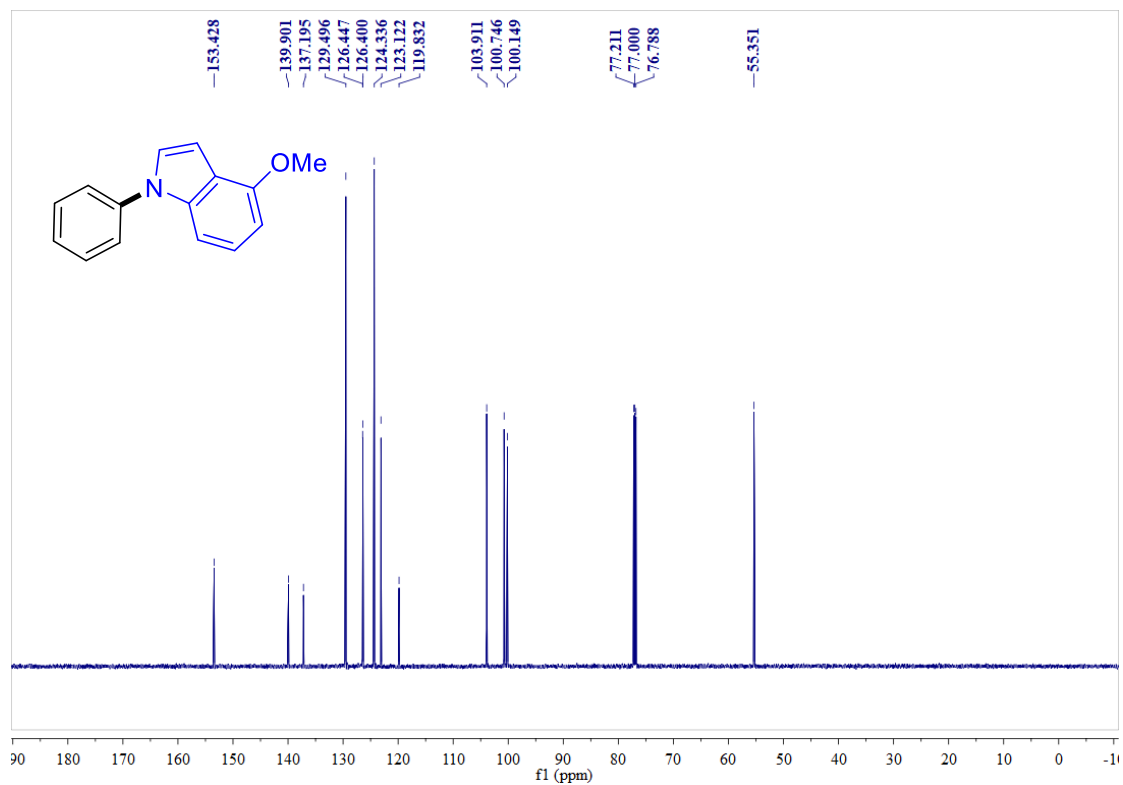

$^1\text{H}$  NMR (600 MHz,  $\text{CDCl}_3$ ) Spectrum of **4e**

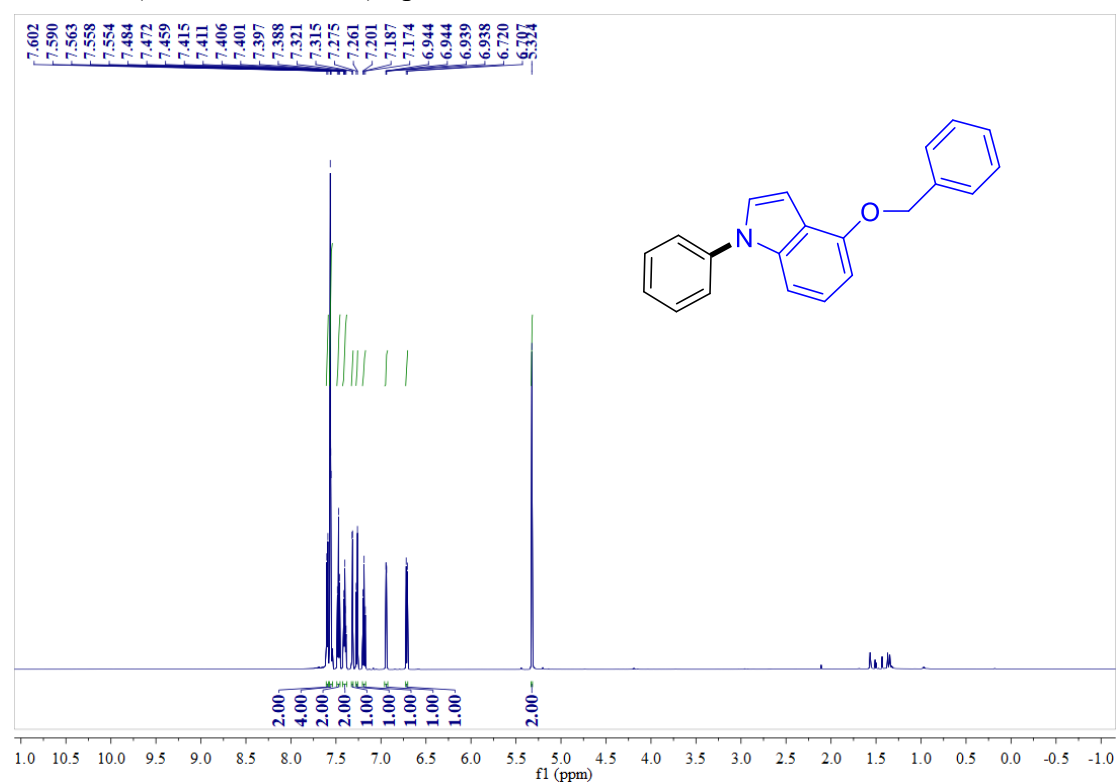

$^{13}\text{C}$  NMR (151 MHz,  $\text{CDCl}_3$ ) Spectrum of **4e**

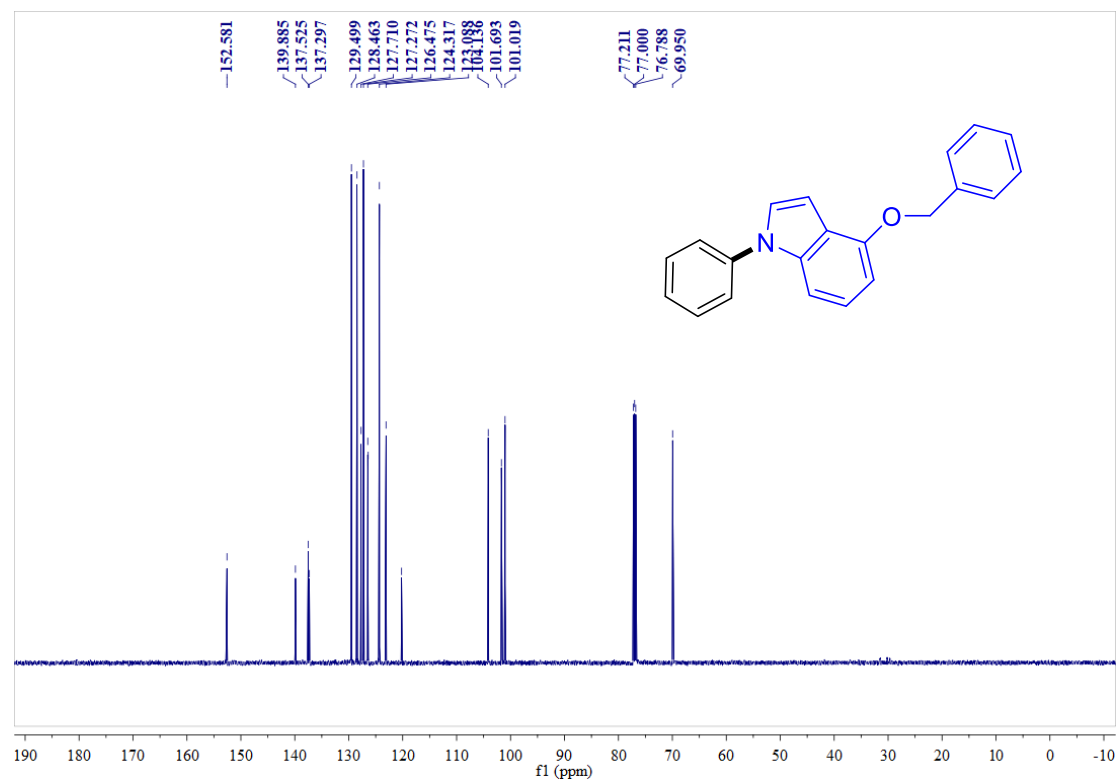

<sup>1</sup>H NMR (600 MHz, CDCl<sub>3</sub>) Spectrum of **4f**

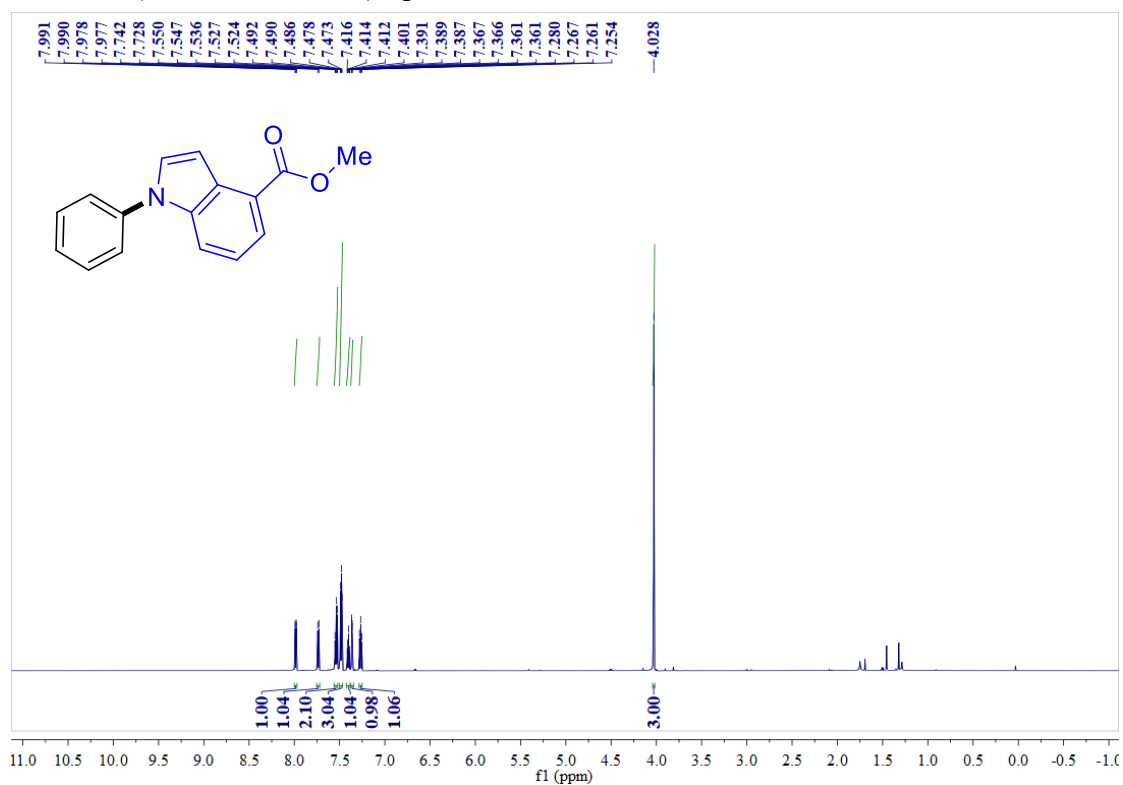

<sup>13</sup>C NMR (151 MHz, CDCl<sub>3</sub>) Spectrum of **4f**

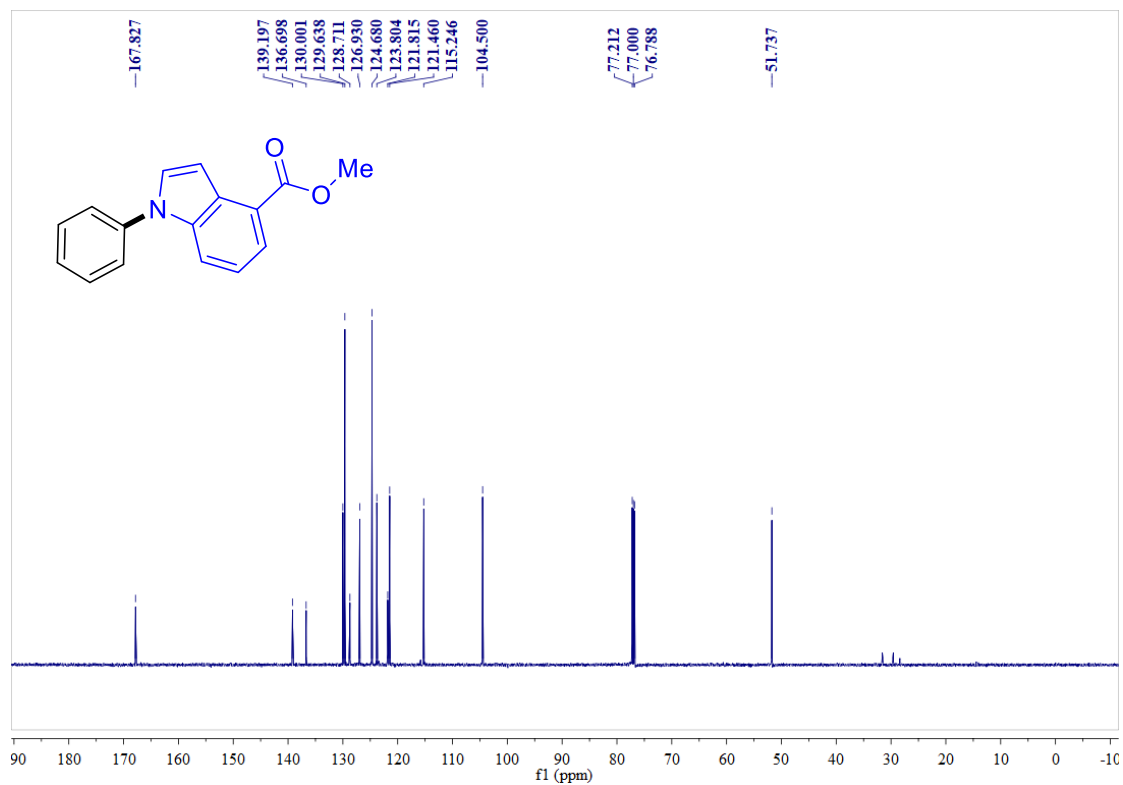

$^1\text{H}$  NMR (600 MHz,  $\text{CDCl}_3$ ) Spectrum of **4g**

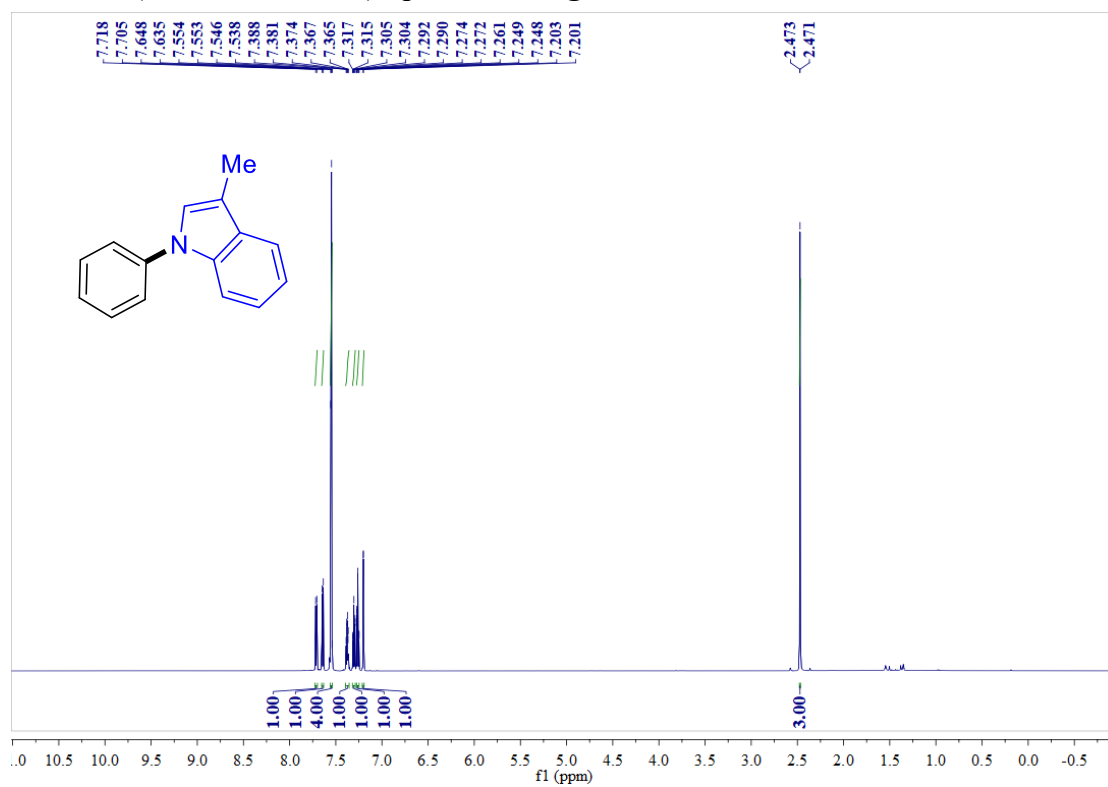

$^{13}\text{C}$  NMR (151 MHz,  $\text{CDCl}_3$ ) Spectrum of **4g**

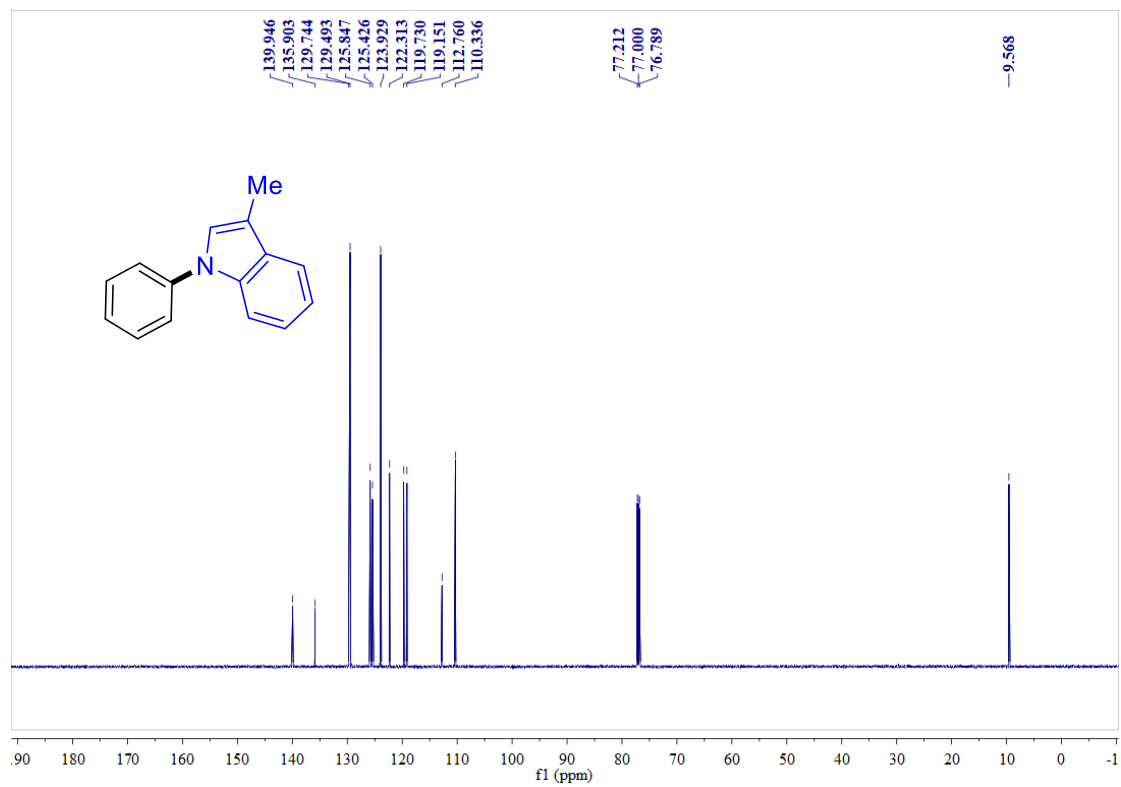

<sup>1</sup>H NMR (600 MHz, CDCl<sub>3</sub>) Spectrum of **4h**

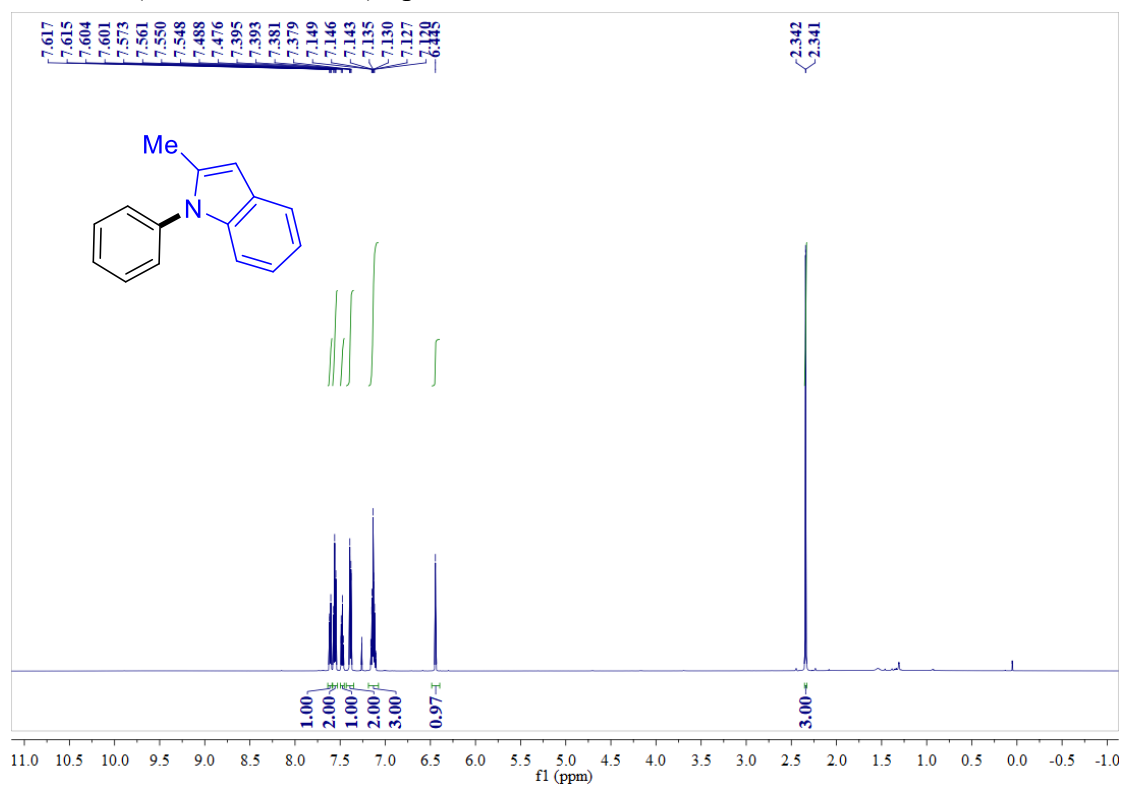

<sup>13</sup>C NMR (151 MHz, CDCl<sub>3</sub>) Spectrum of **4h**

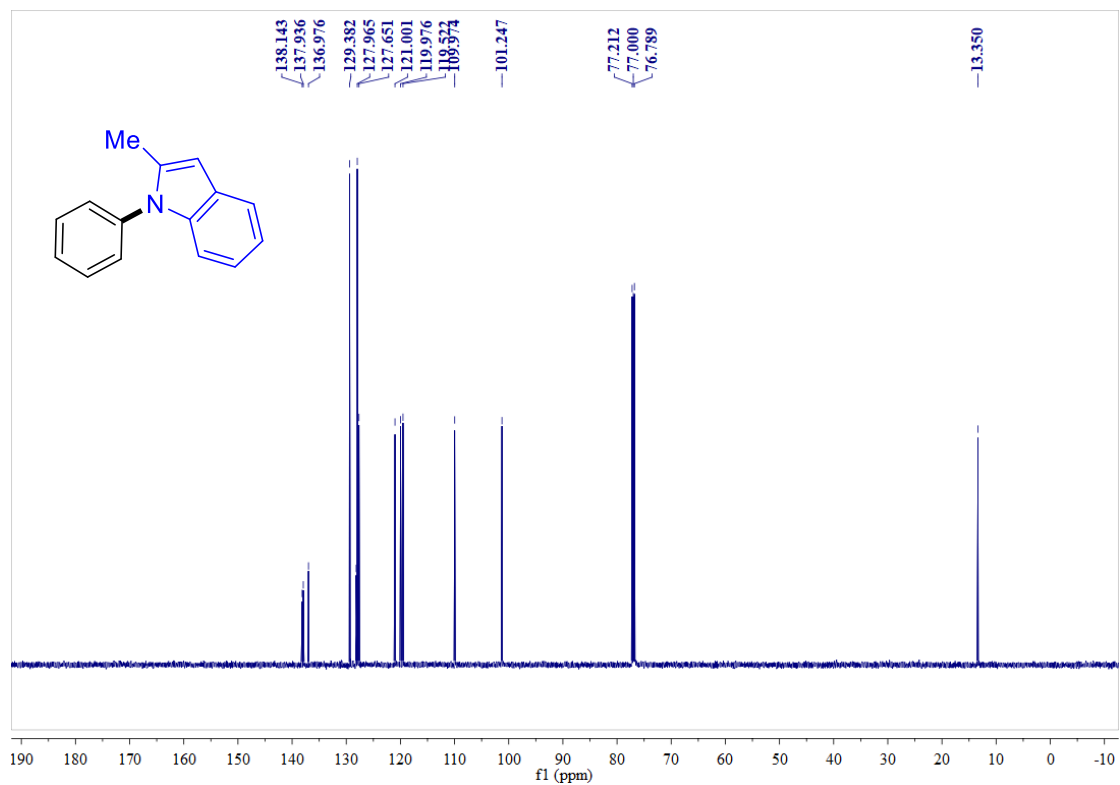

<sup>1</sup>H NMR (600 MHz, CDCl<sub>3</sub>) Spectrum of **4i**

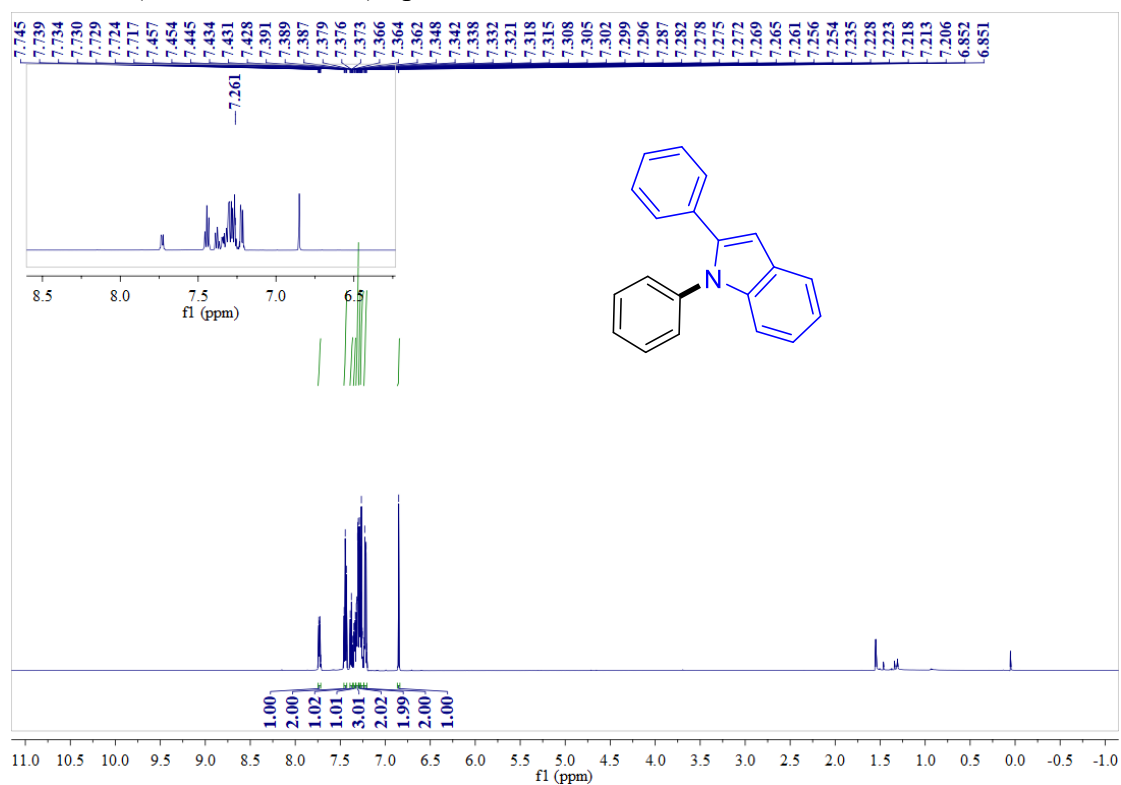

<sup>13</sup>C NMR (151 MHz, CDCl<sub>3</sub>) Spectrum of **4i**

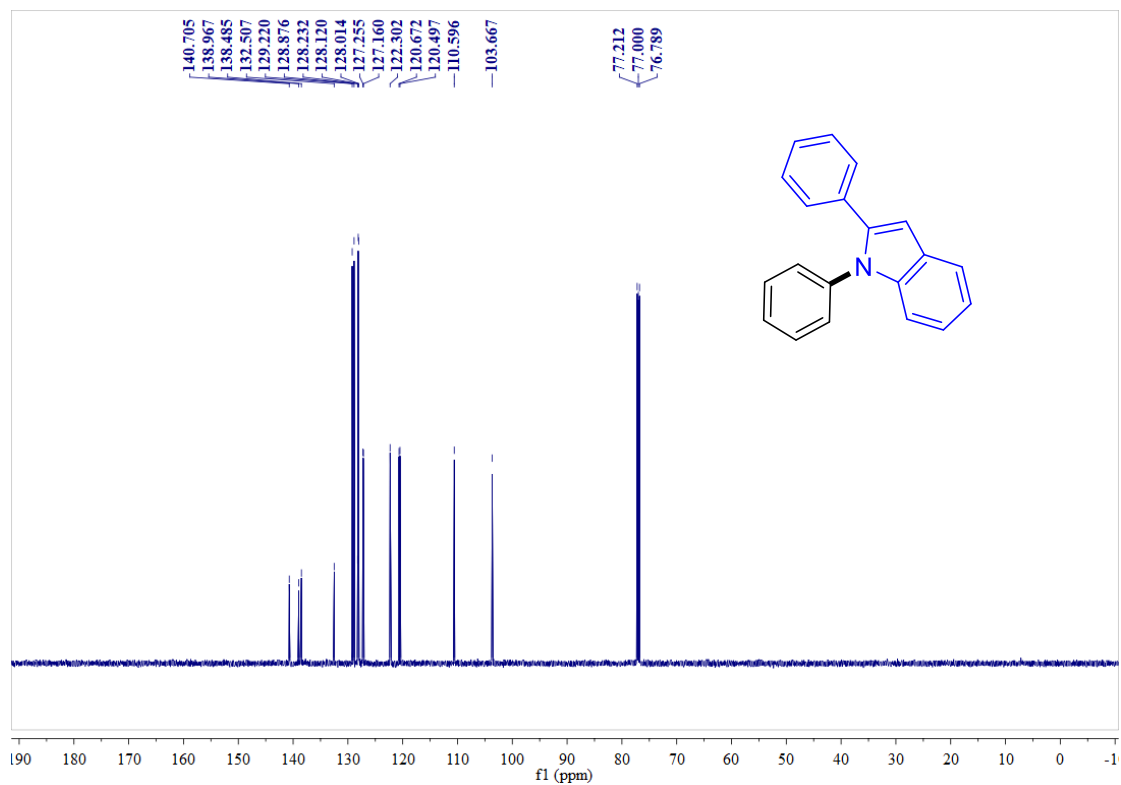

$^1\text{H}$  NMR (600 MHz,  $\text{CDCl}_3$ ) Spectrum of **4j**

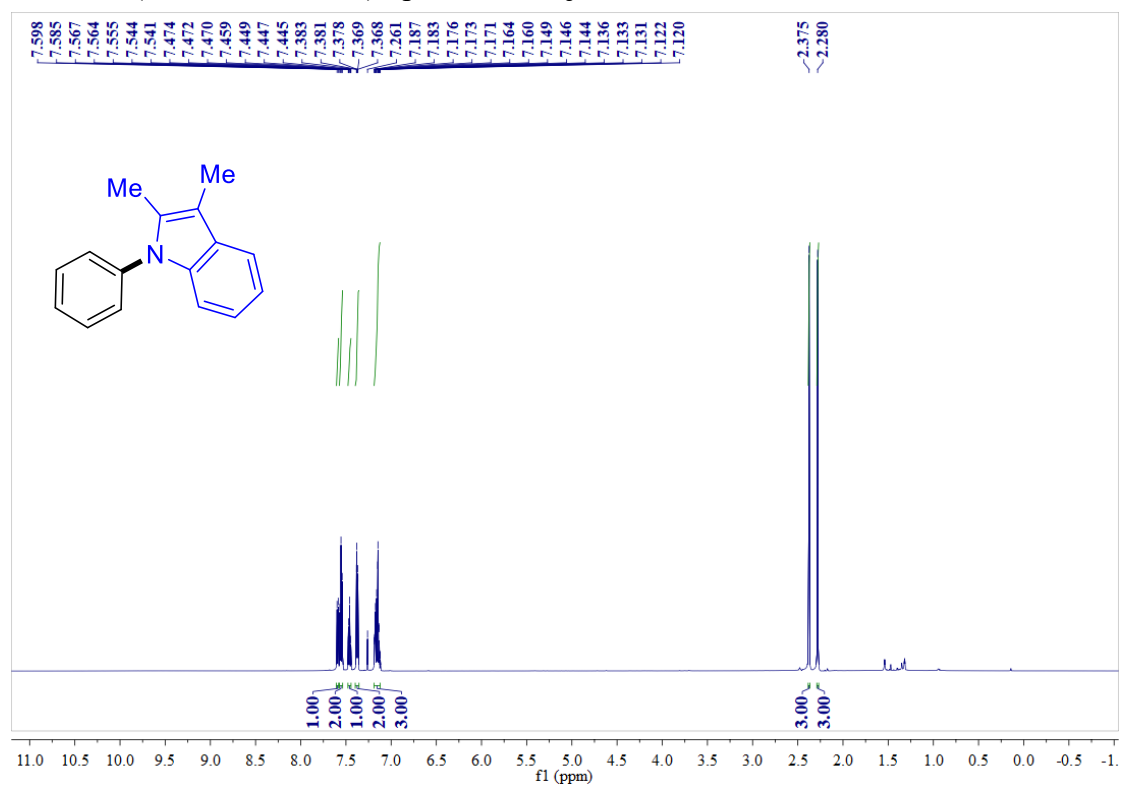

$^{13}\text{C}$  NMR (151 MHz,  $\text{CDCl}_3$ ) Spectrum of **4j**

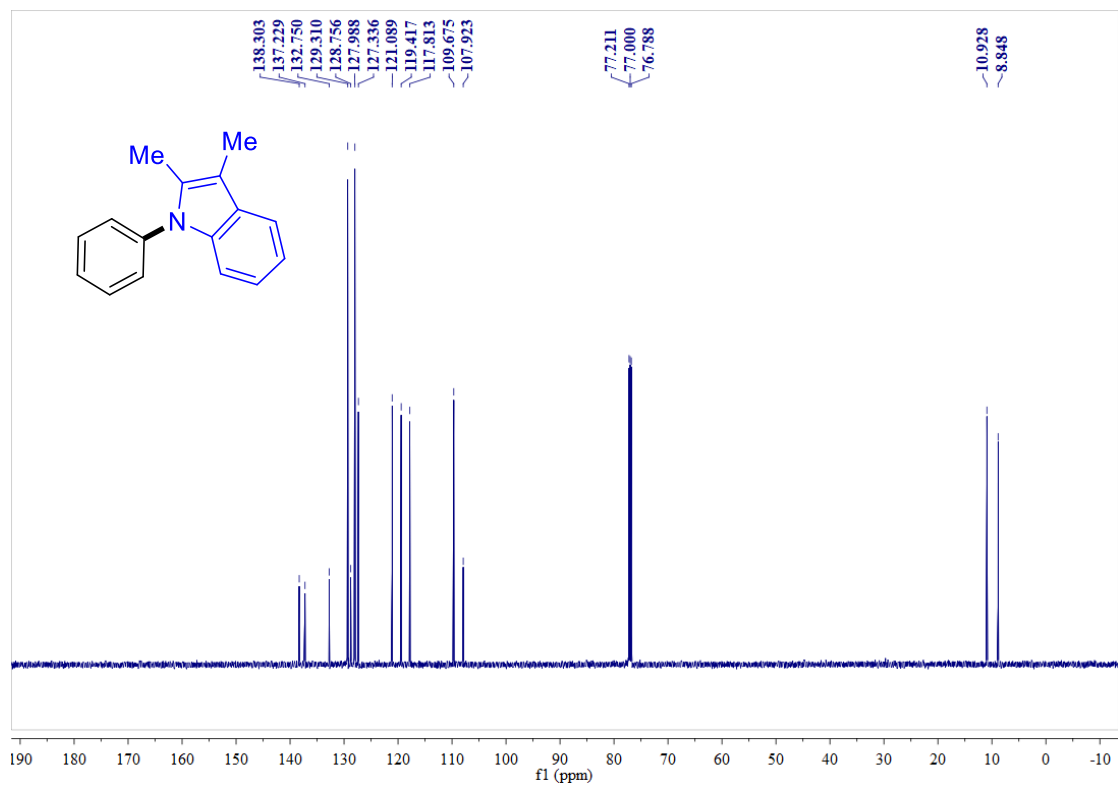

<sup>1</sup>H NMR (600 MHz, CDCl<sub>3</sub>) Spectrum of **4k**

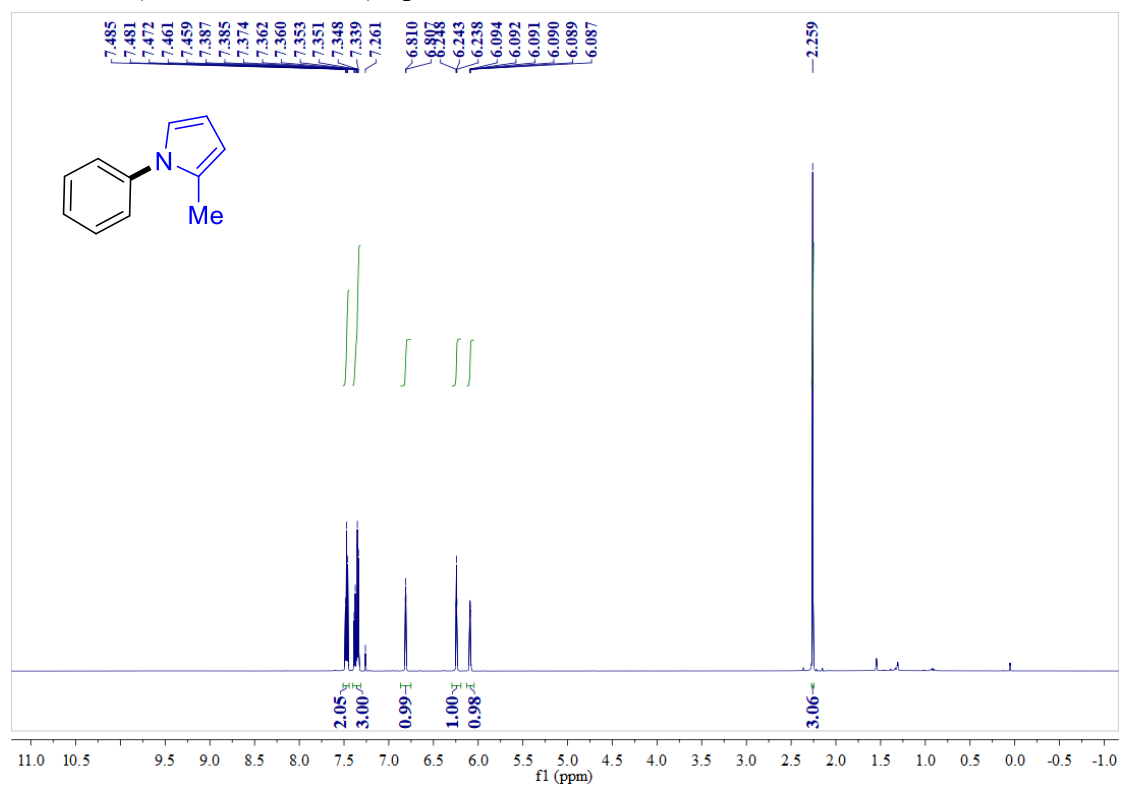

<sup>13</sup>C NMR (151 MHz, CDCl<sub>3</sub>) Spectrum of **4k**

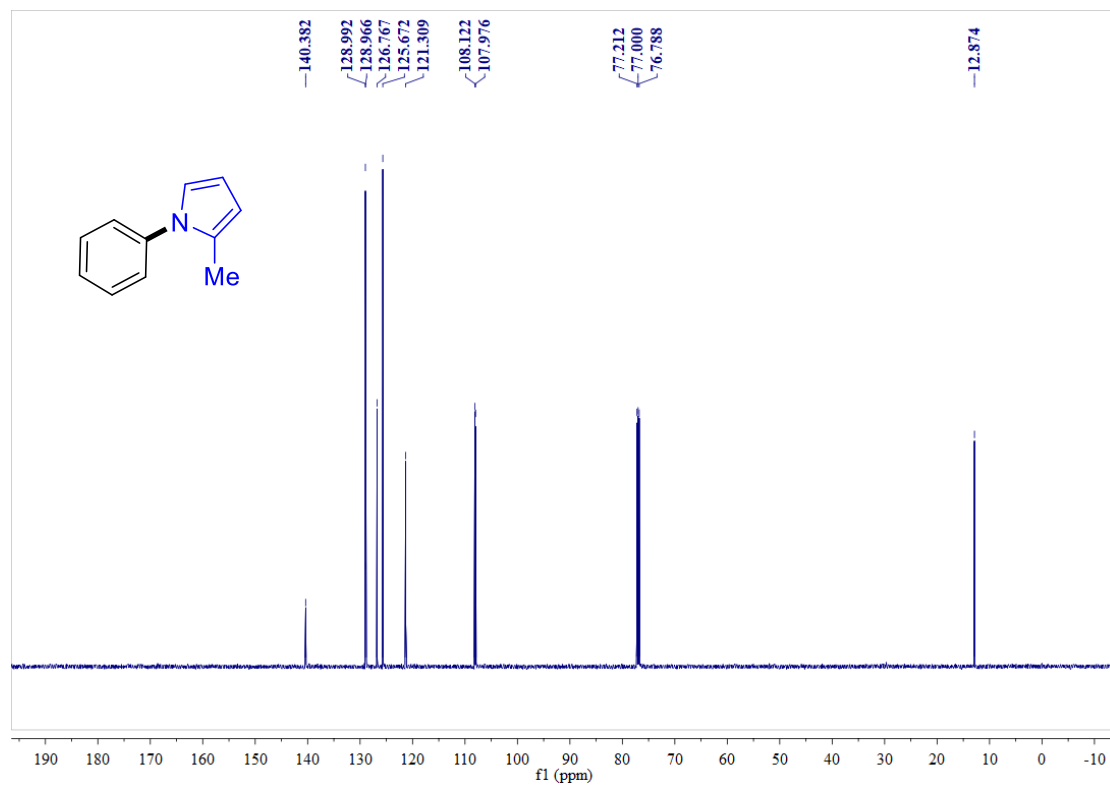



<sup>1</sup>H NMR (600 MHz, CDCl<sub>3</sub>) Spectrum of **4l**

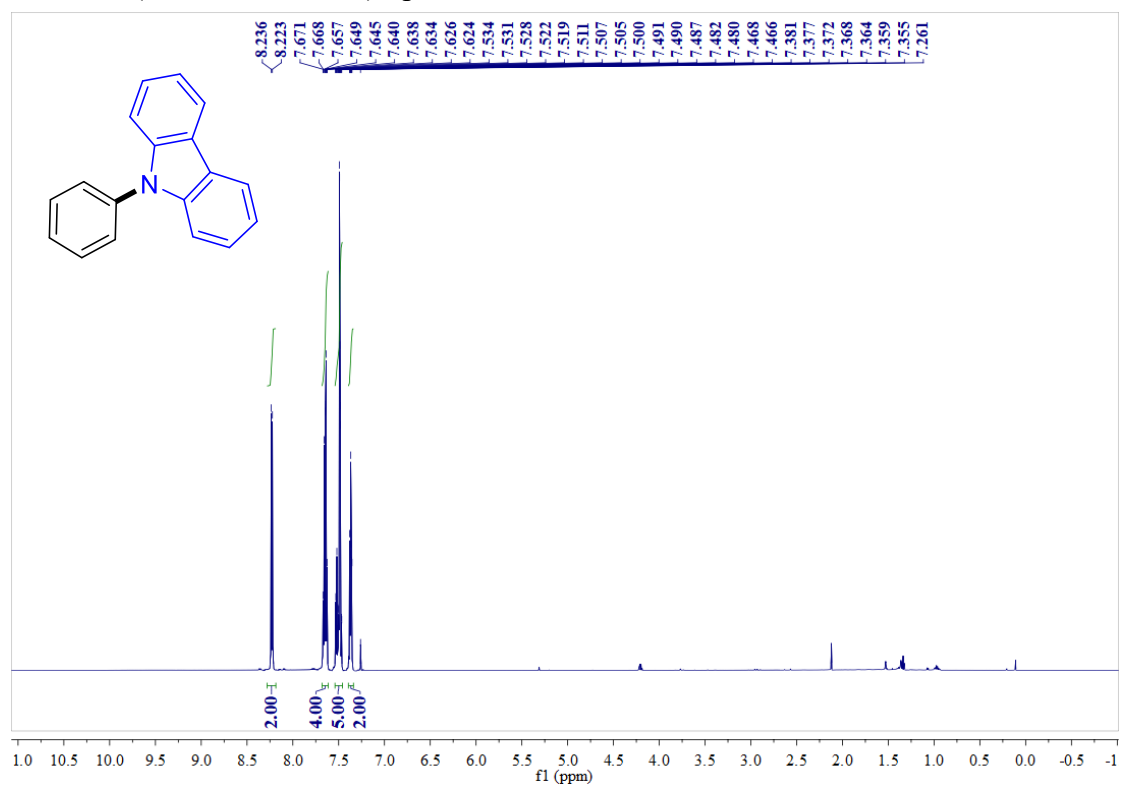

<sup>13</sup>C NMR (151 MHz, CDCl<sub>3</sub>) Spectrum of **4l**

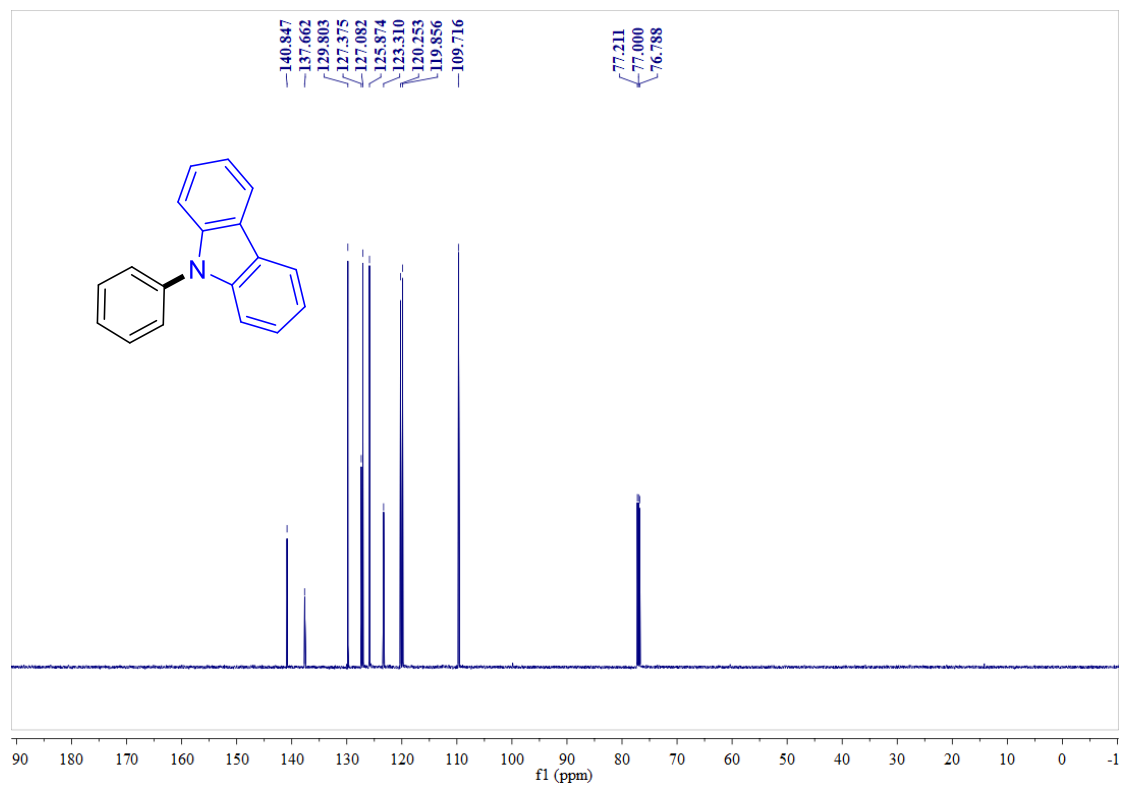

<sup>1</sup>H NMR (600 MHz, CDCl<sub>3</sub>) Spectrum of **4m**

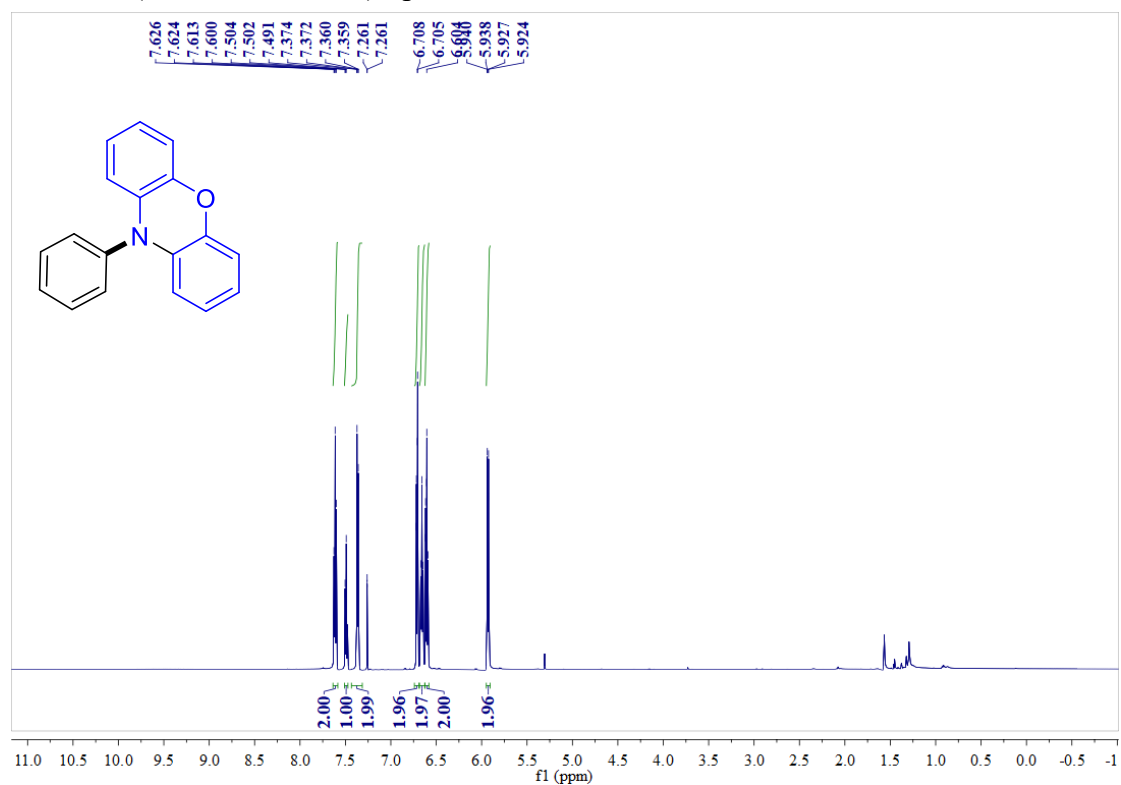

<sup>13</sup>C NMR (151 MHz, CDCl<sub>3</sub>) Spectrum of **4m**

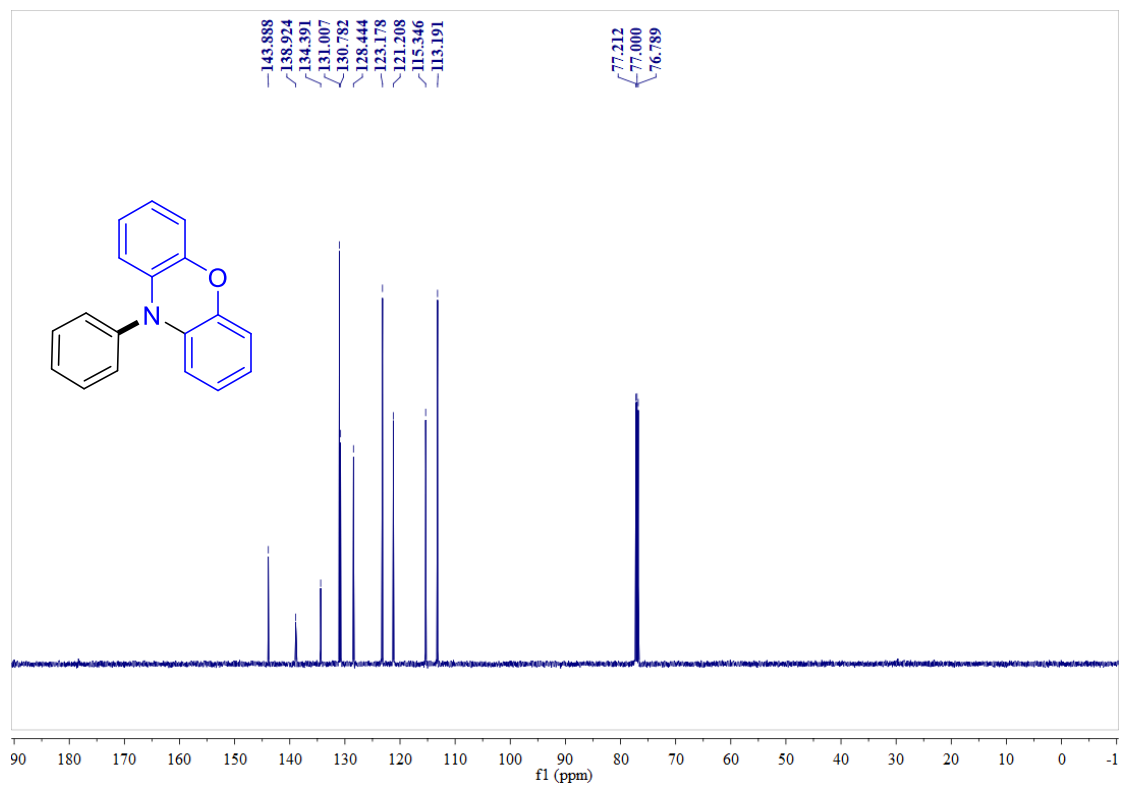

<sup>1</sup>H NMR (600 MHz, CDCl<sub>3</sub>) Spectrum of **4n**

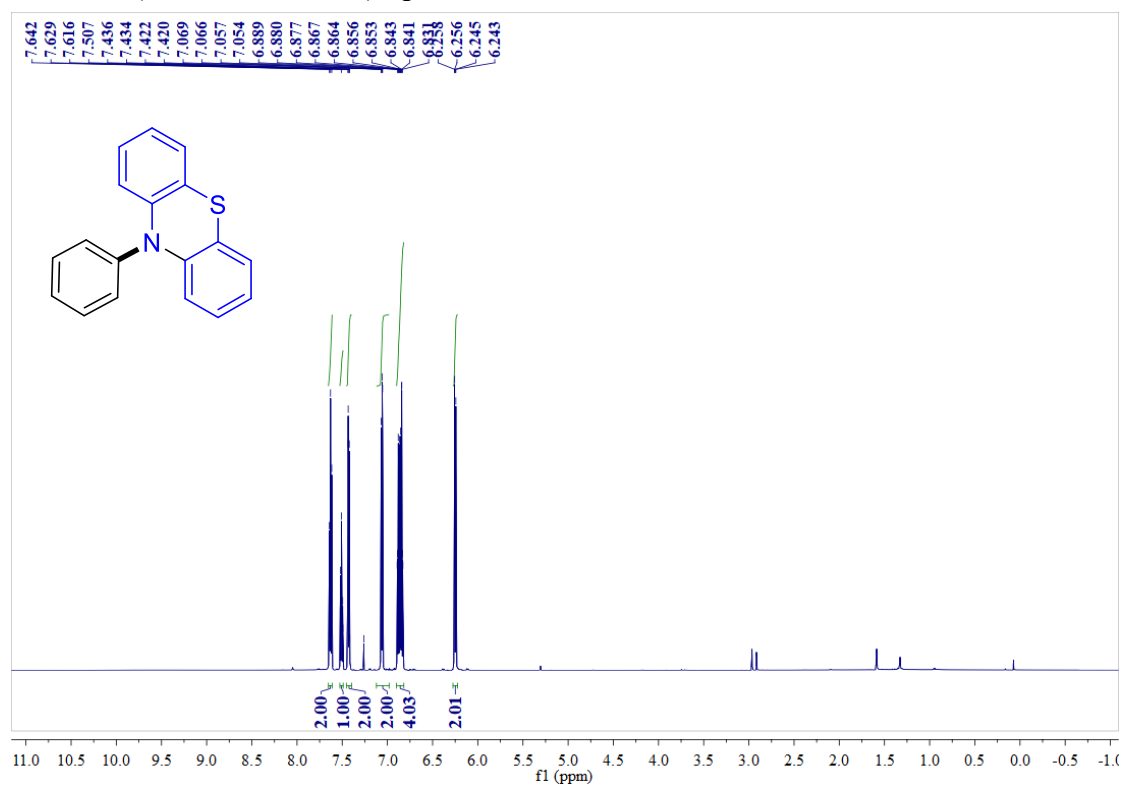

<sup>13</sup>C NMR (151 MHz, CDCl<sub>3</sub>) Spectrum of **4n**

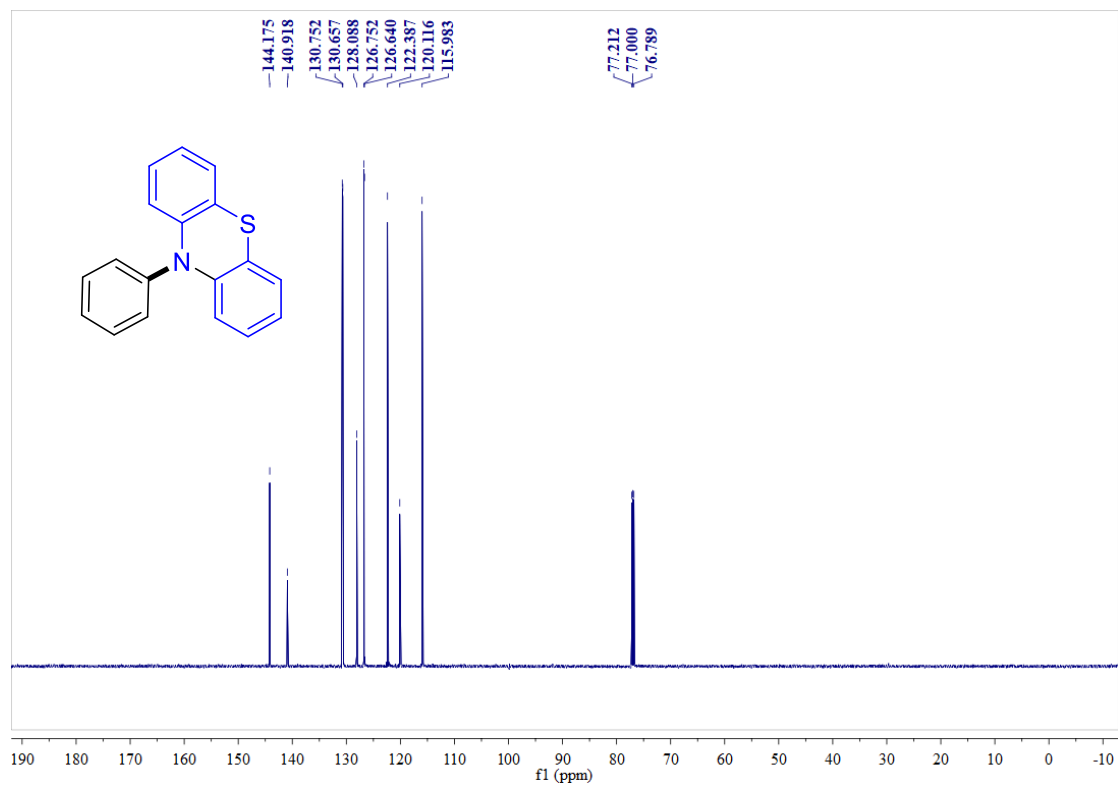

<sup>1</sup>H NMR (600 MHz, CDCl<sub>3</sub>) Spectrum of **5**

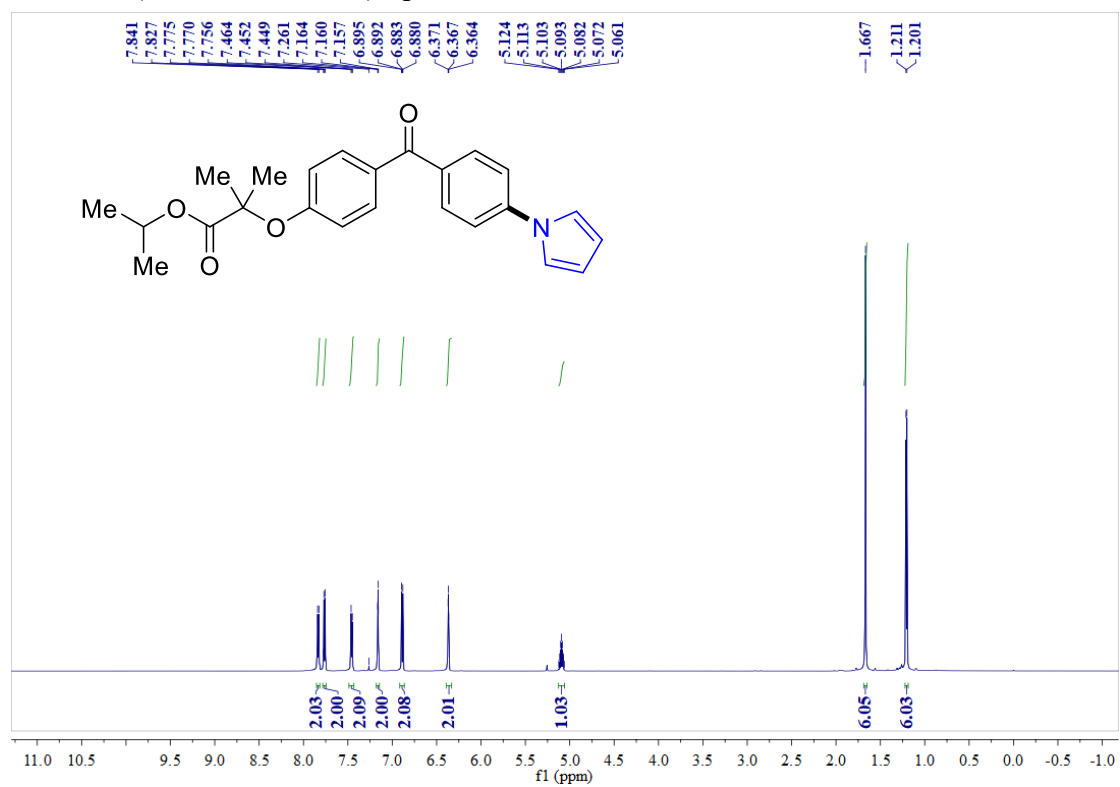

<sup>13</sup>C NMR (151 MHz, CDCl<sub>3</sub>) Spectrum of **5**

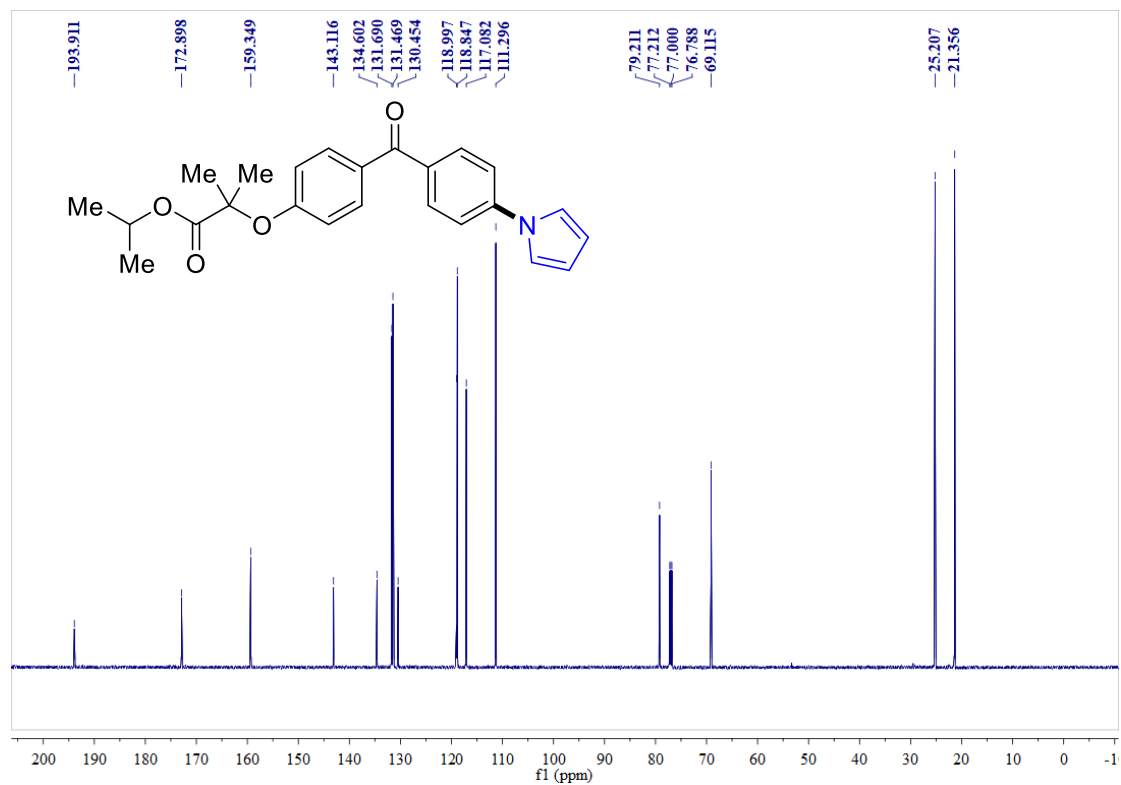

$^1\text{H}$  NMR (600 MHz,  $\text{CDCl}_3$ ) Spectrum of **6**

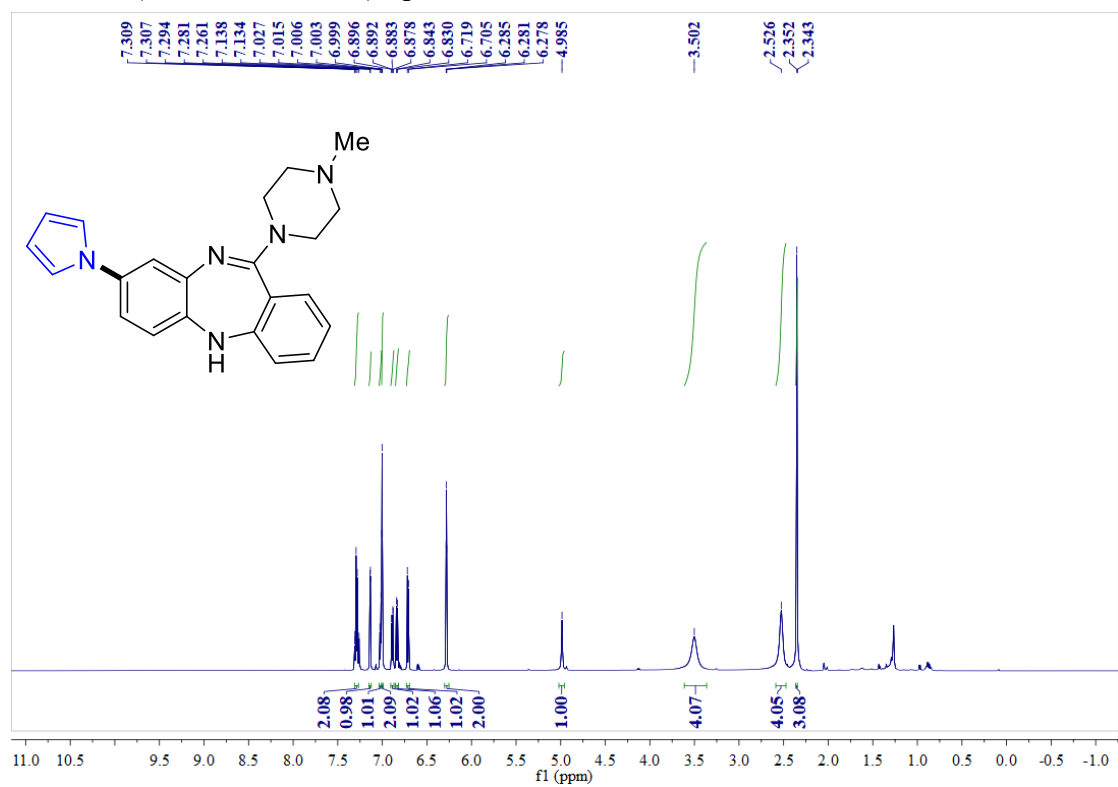

$^{13}\text{C}$  NMR (151 MHz,  $\text{CDCl}_3$ ) Spectrum of **6**

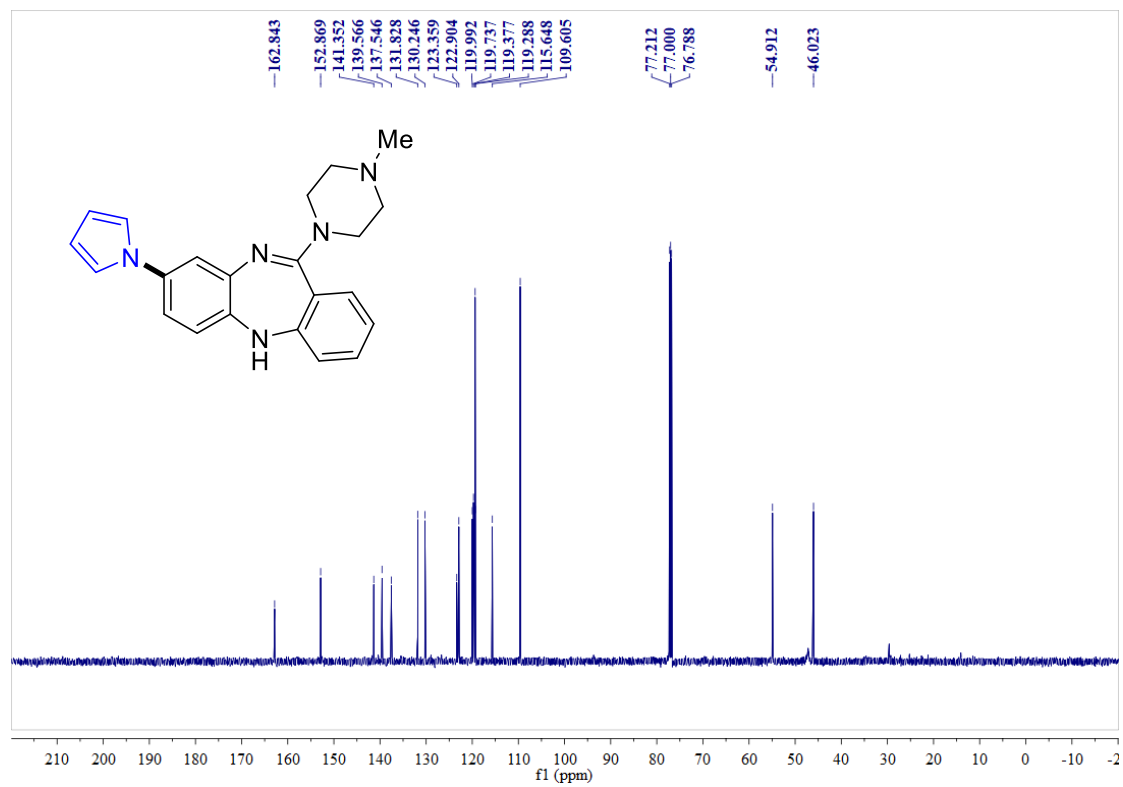

$^1\text{H}$  NMR (600 MHz,  $\text{CDCl}_3$ ) Spectrum of 7

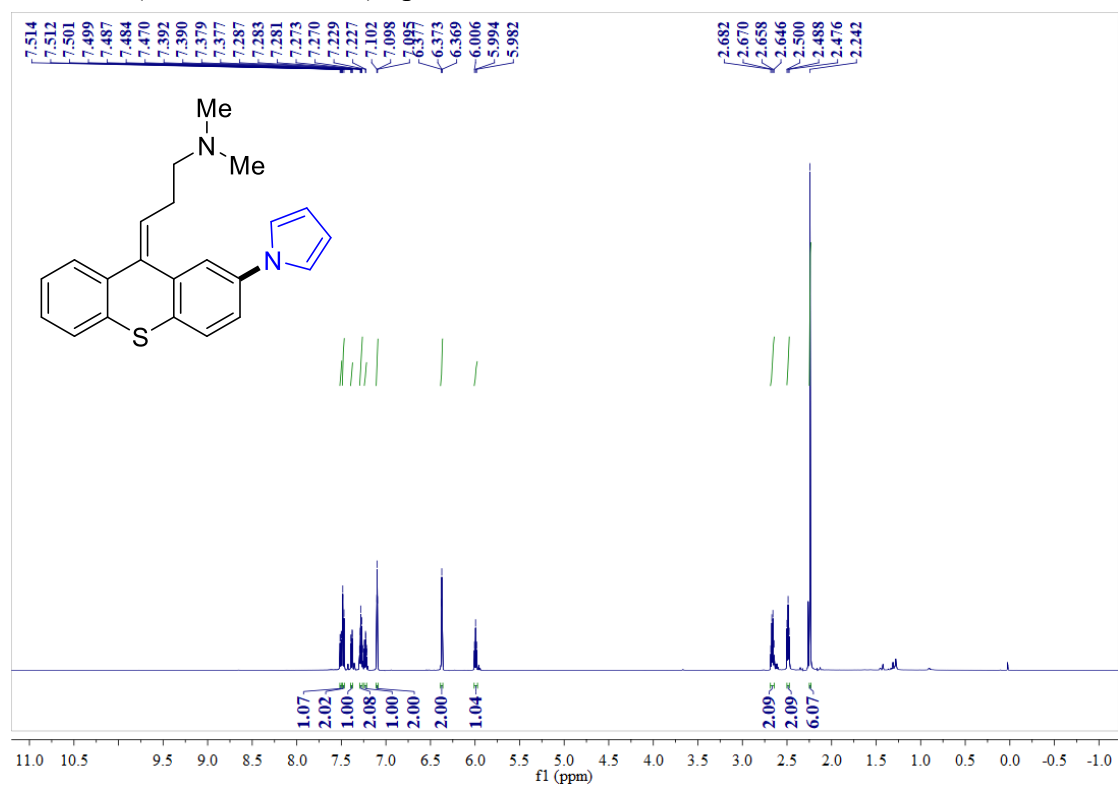

$^{13}\text{C}$  NMR (151 MHz,  $\text{CDCl}_3$ ) Spectrum of 7

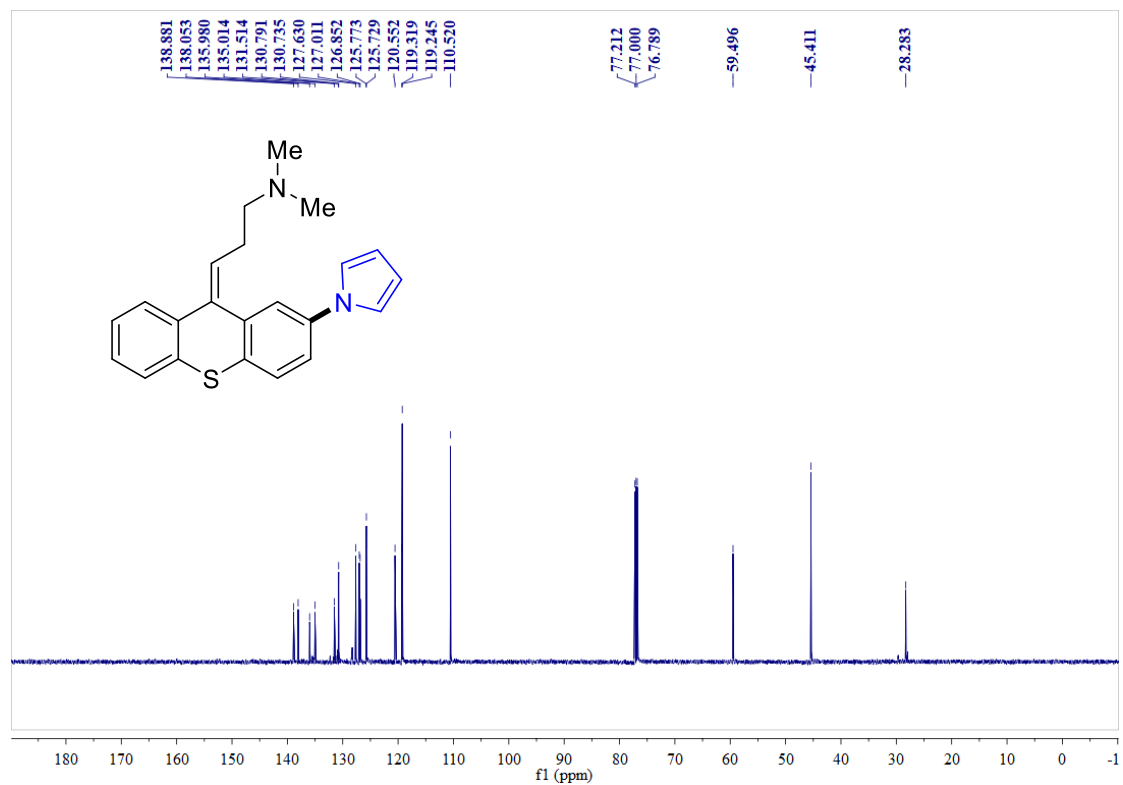

$^1\text{H}$  NMR (600 MHz,  $\text{CDCl}_3$ ) Spectrum of **8**

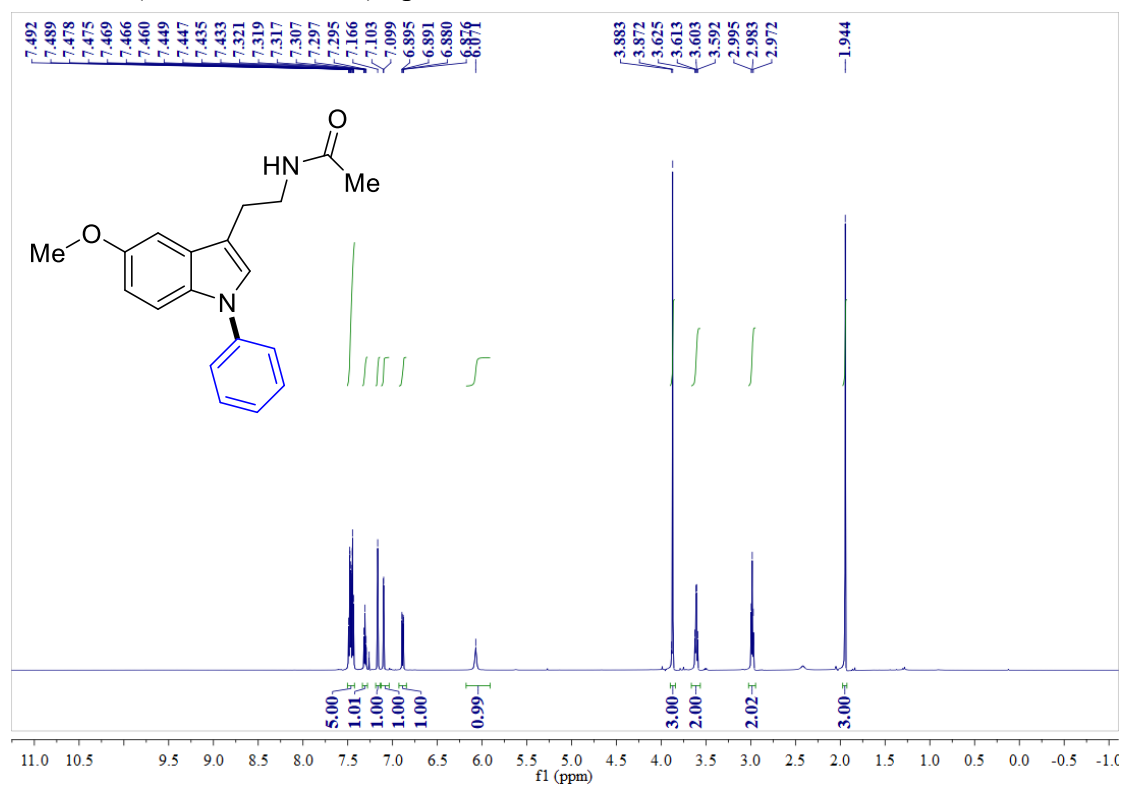

$^{13}\text{C}$  NMR (151 MHz,  $\text{CDCl}_3$ ) Spectrum of **8**

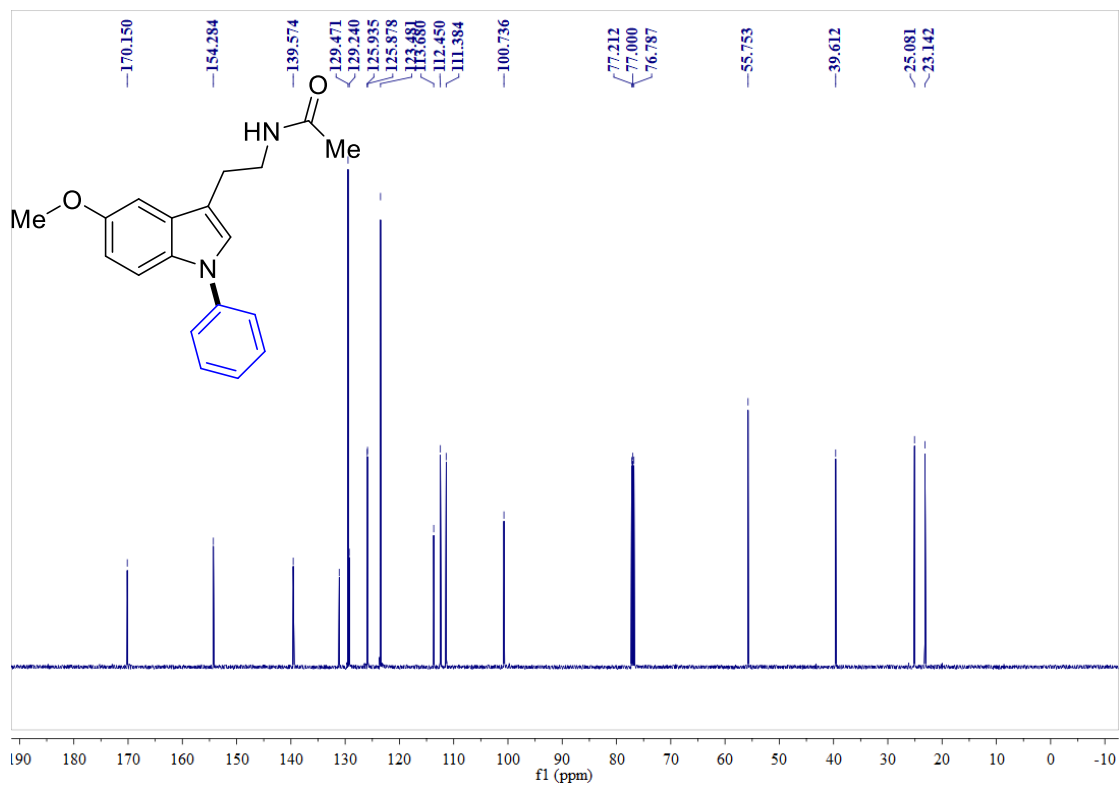

$^1\text{H}$  NMR (600 MHz,  $\text{CDCl}_3$ ) Spectrum of **9**

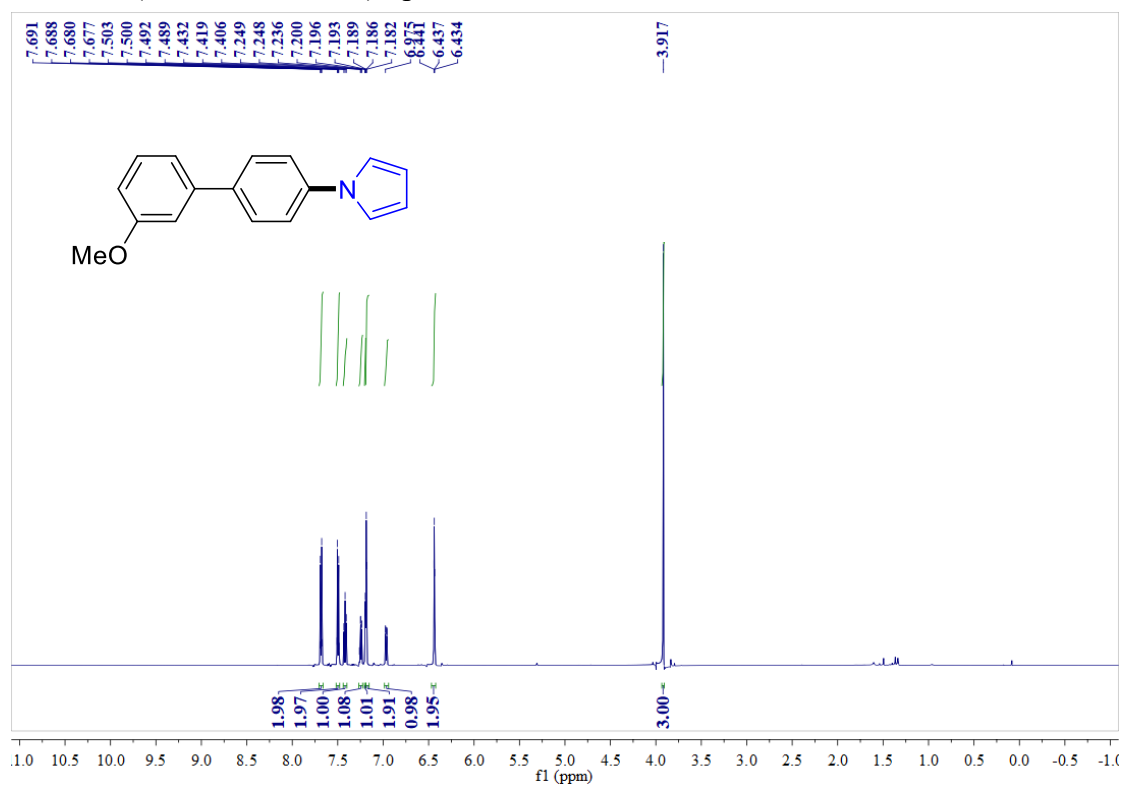

$^{13}\text{C}$  NMR (151 MHz,  $\text{CDCl}_3$ ) Spectrum of **9**

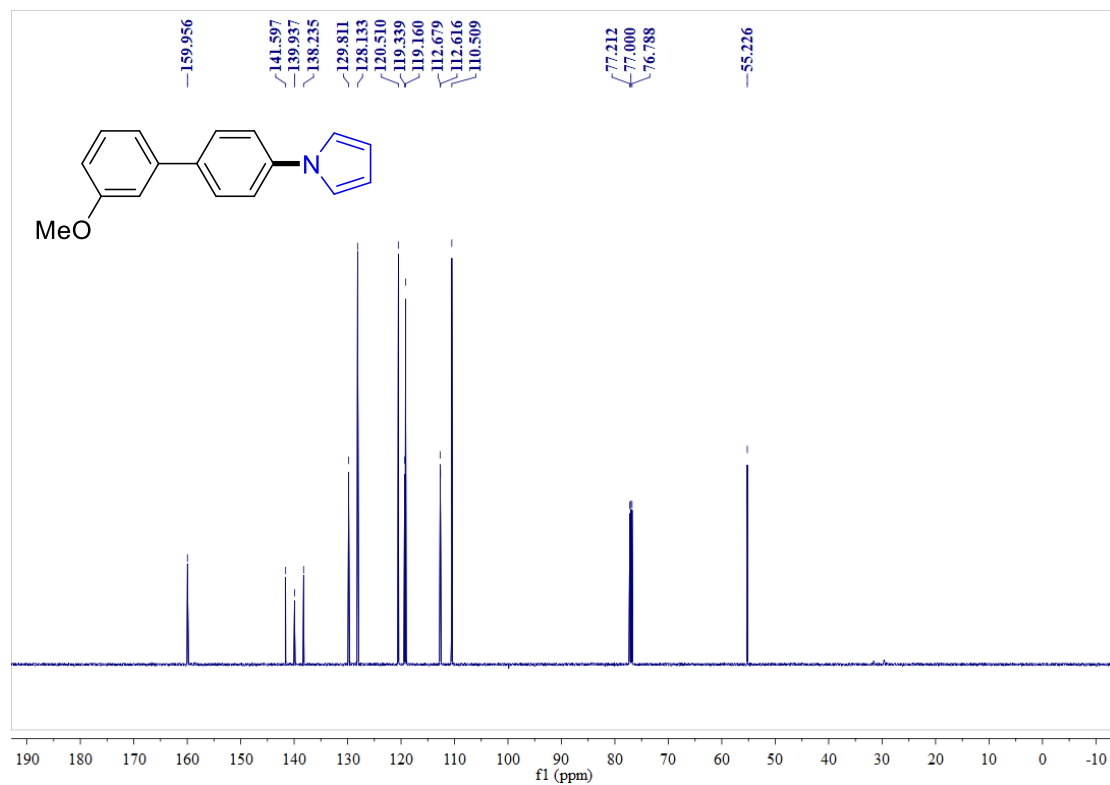



<sup>1</sup>H NMR (600 MHz, CDCl<sub>3</sub>) Spectrum of **10**

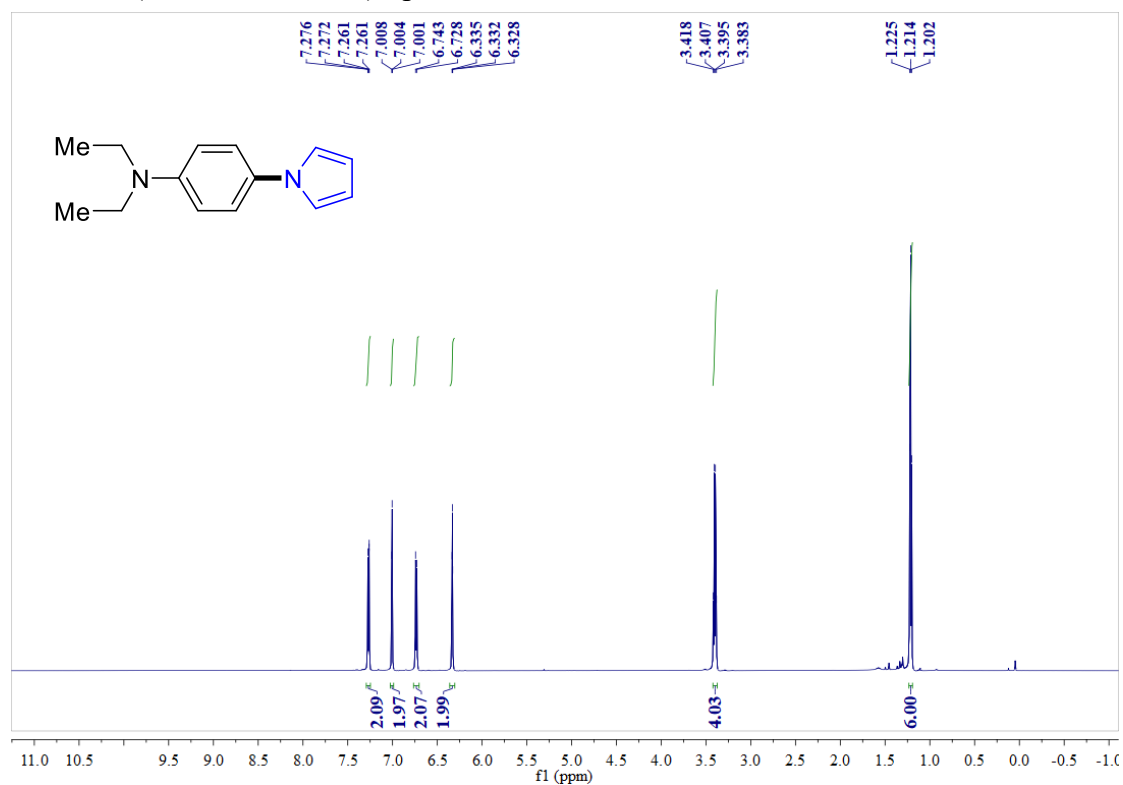

<sup>13</sup>C NMR (151 MHz, CDCl<sub>3</sub>) Spectrum of **10**

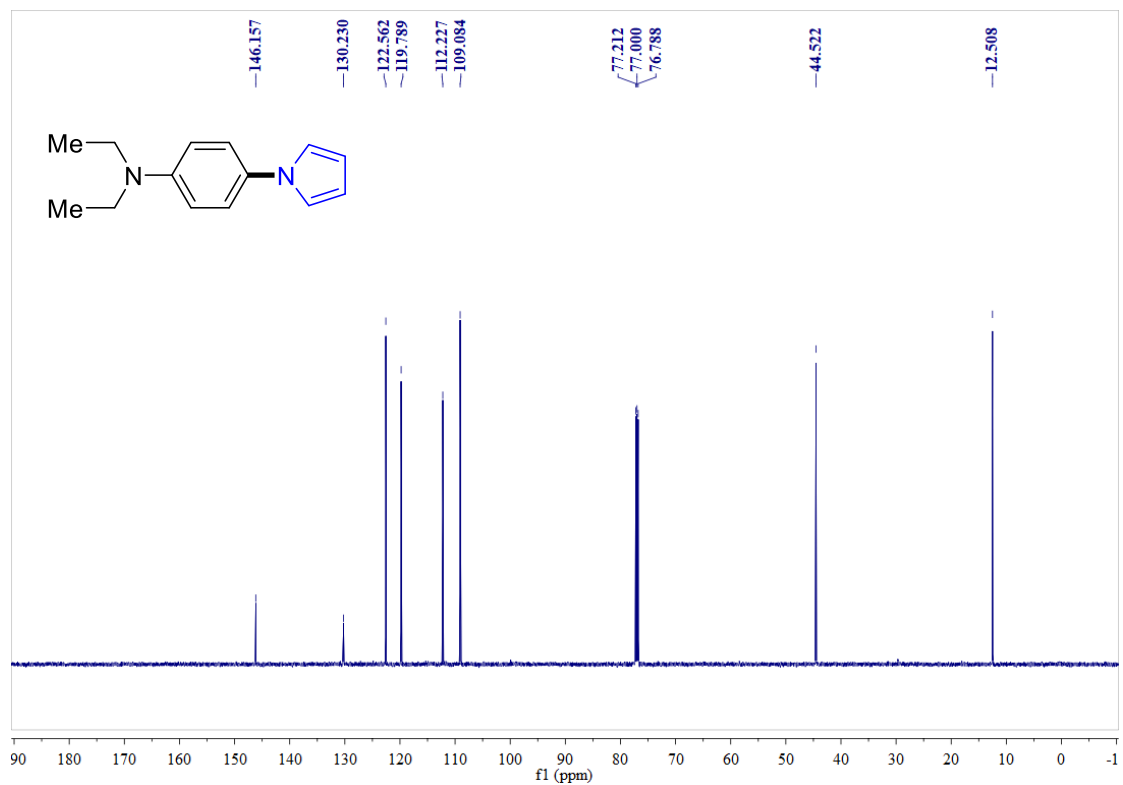

<sup>1</sup>H NMR (600 MHz, CDCl<sub>3</sub>) Spectrum of **11**

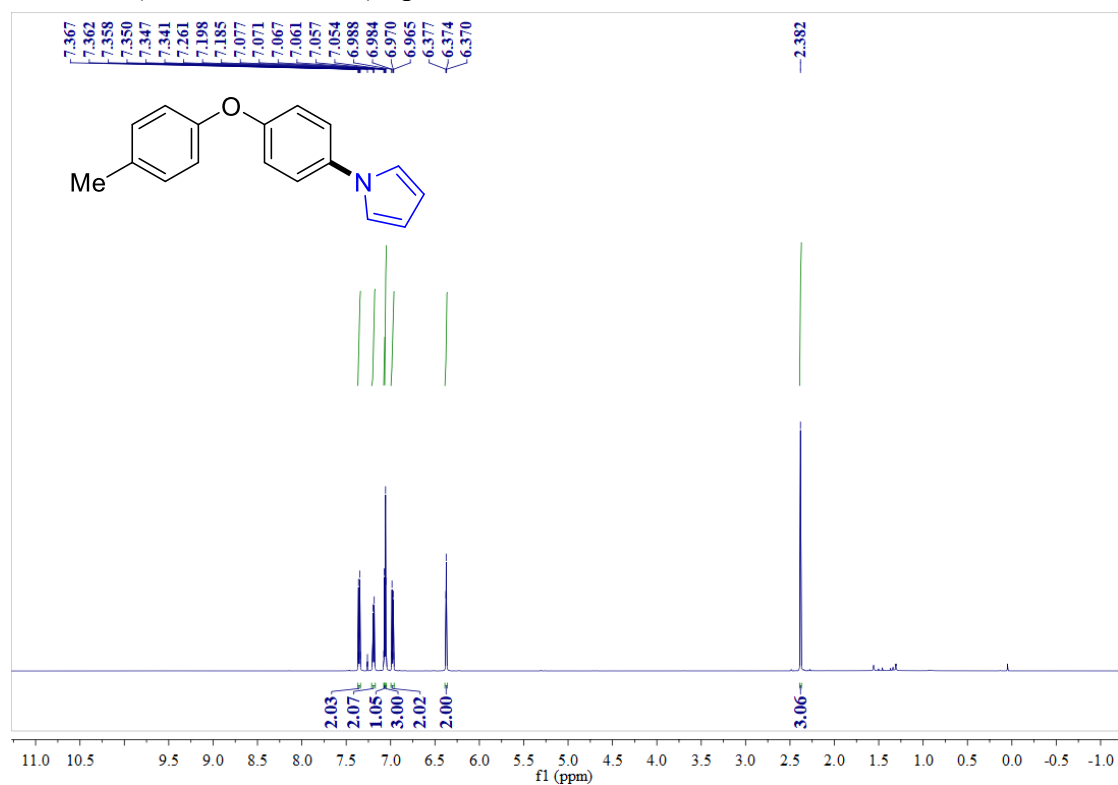

<sup>13</sup>C NMR (151 MHz, CDCl<sub>3</sub>) Spectrum of **11**

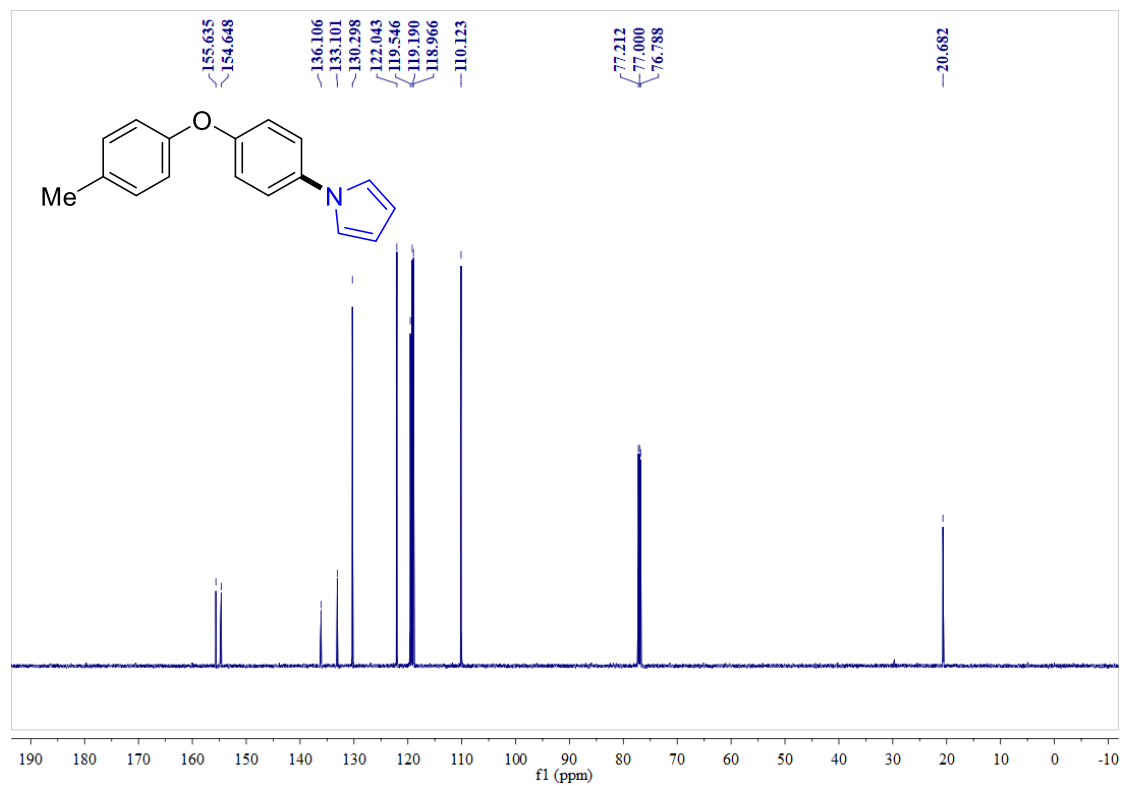

<sup>1</sup>H NMR (600 MHz, CDCl<sub>3</sub>) Spectrum of **12**

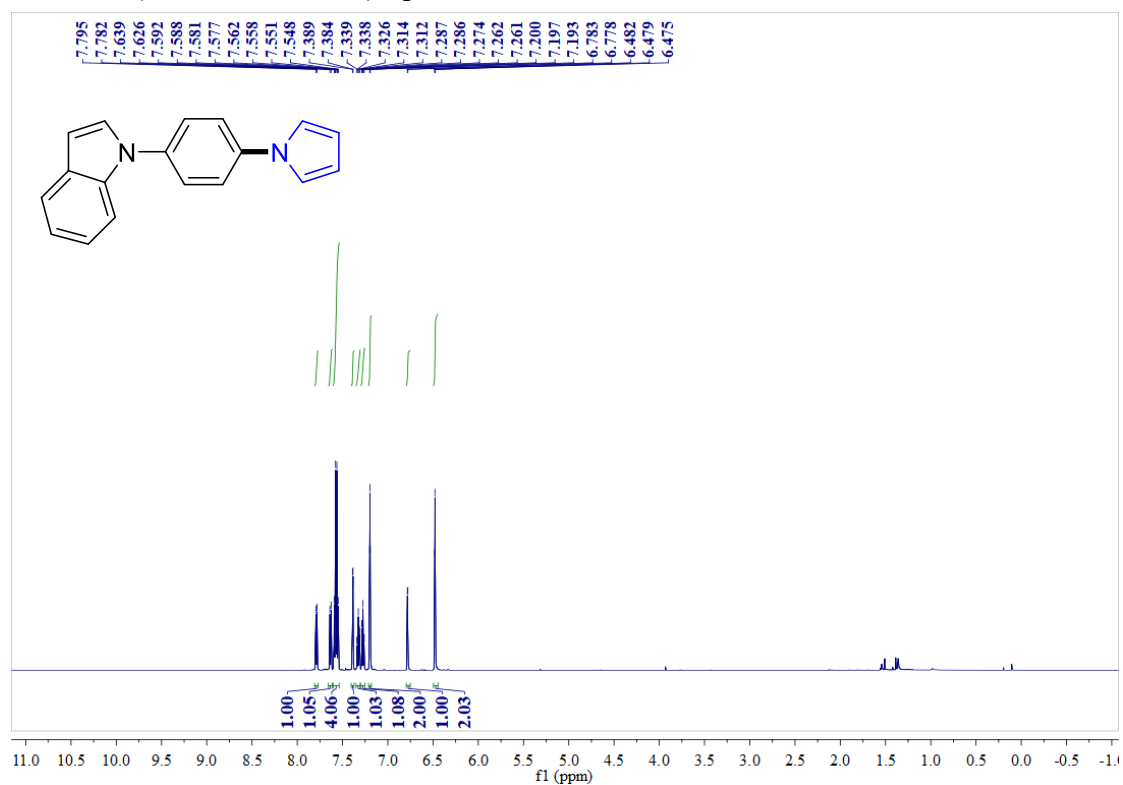

<sup>13</sup>C NMR (151 MHz, CDCl<sub>3</sub>) Spectrum of **12**

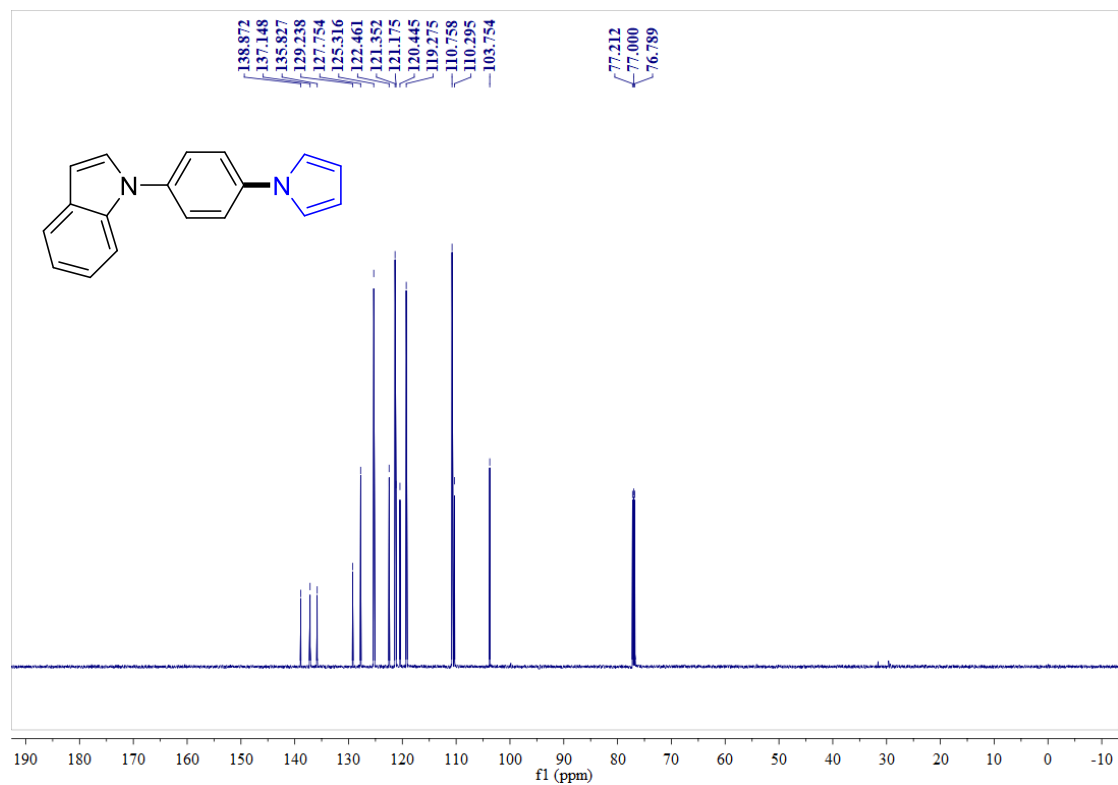

<sup>1</sup>H NMR (600 MHz, CDCl<sub>3</sub>) Spectrum of **9a**

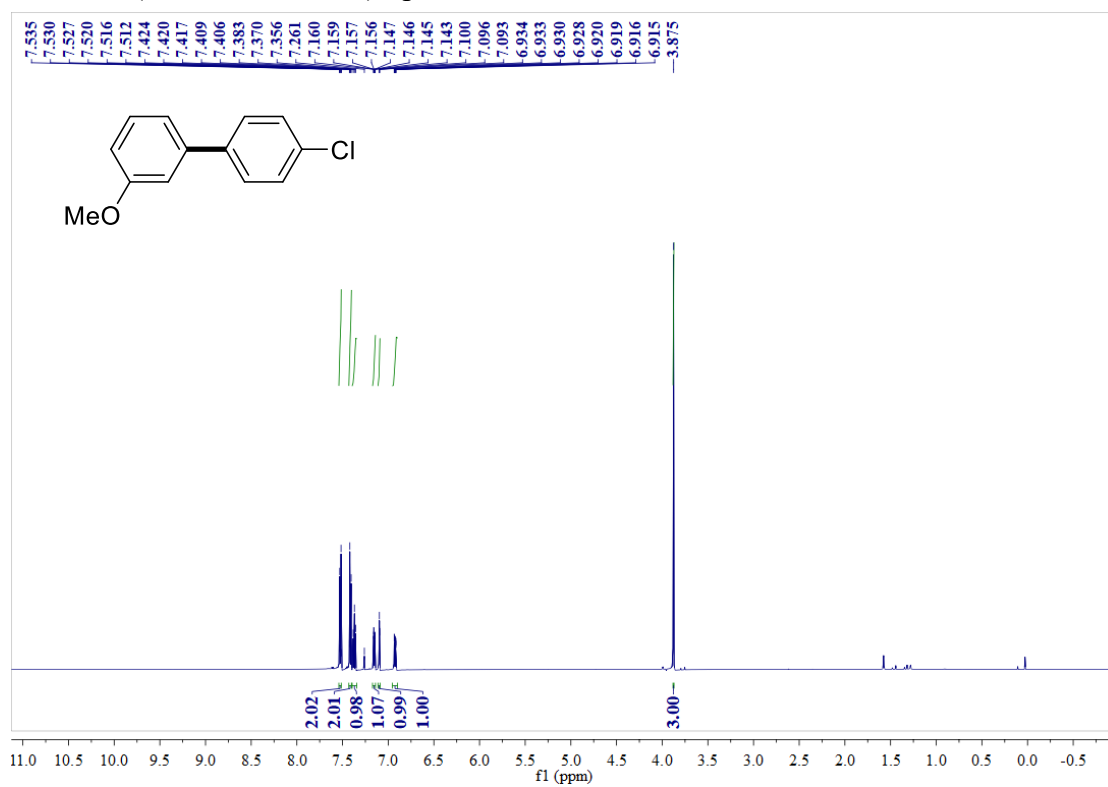

<sup>13</sup>C NMR (151 MHz, CDCl<sub>3</sub>) Spectrum of **9a**

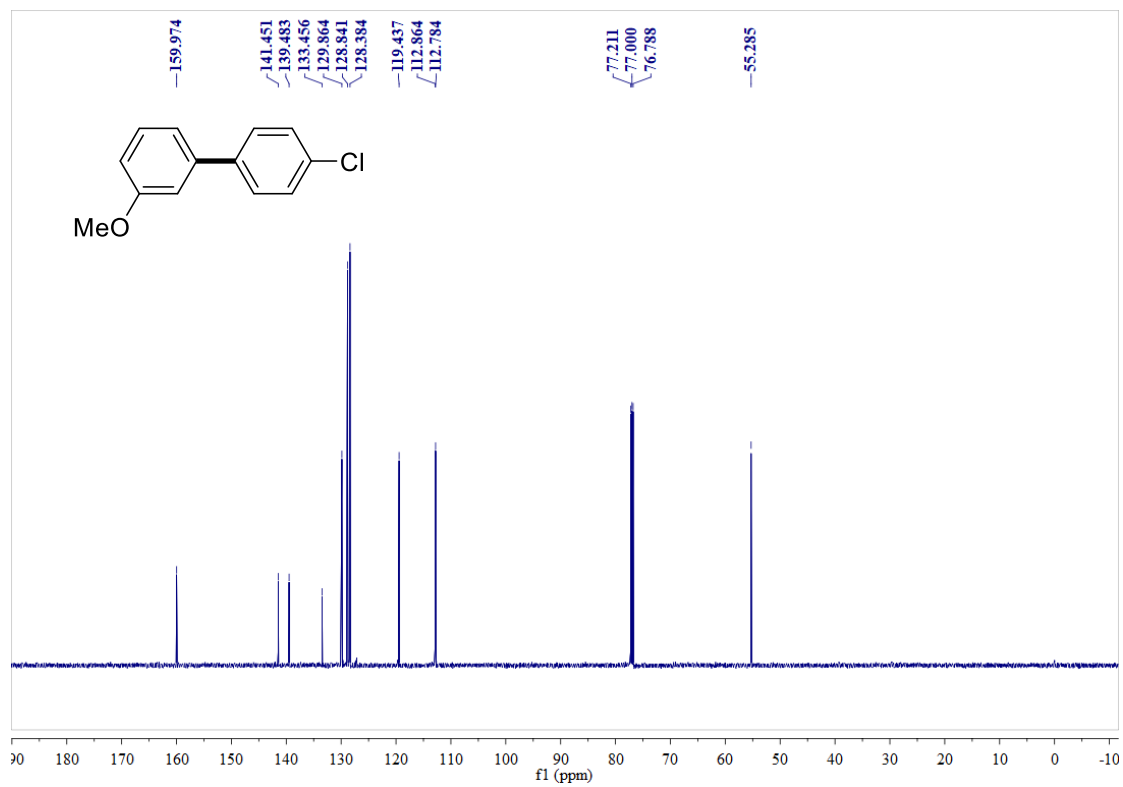

$^1\text{H}$  NMR (600 MHz,  $\text{CDCl}_3$ ) Spectrum of **10a**

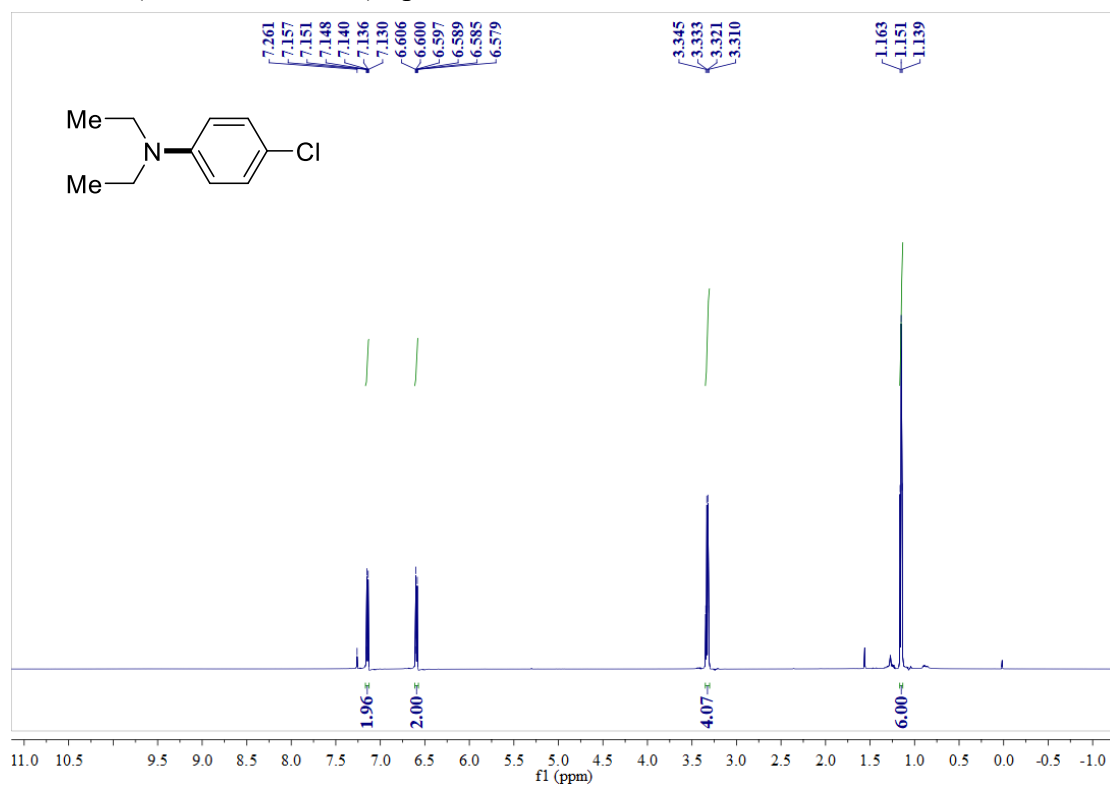

$^{13}\text{C}$  NMR (151 MHz,  $\text{CDCl}_3$ ) Spectrum of **10a**

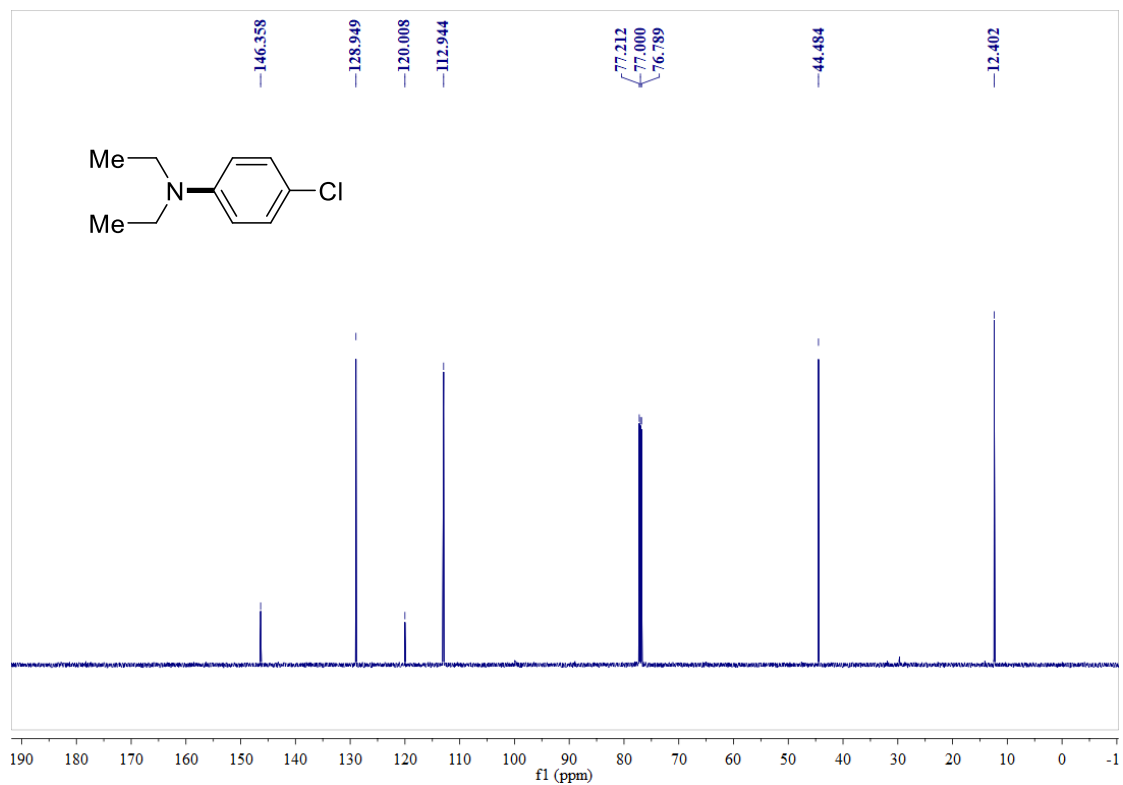

<sup>1</sup>H NMR (600 MHz, CDCl<sub>3</sub>) Spectrum of **11a**

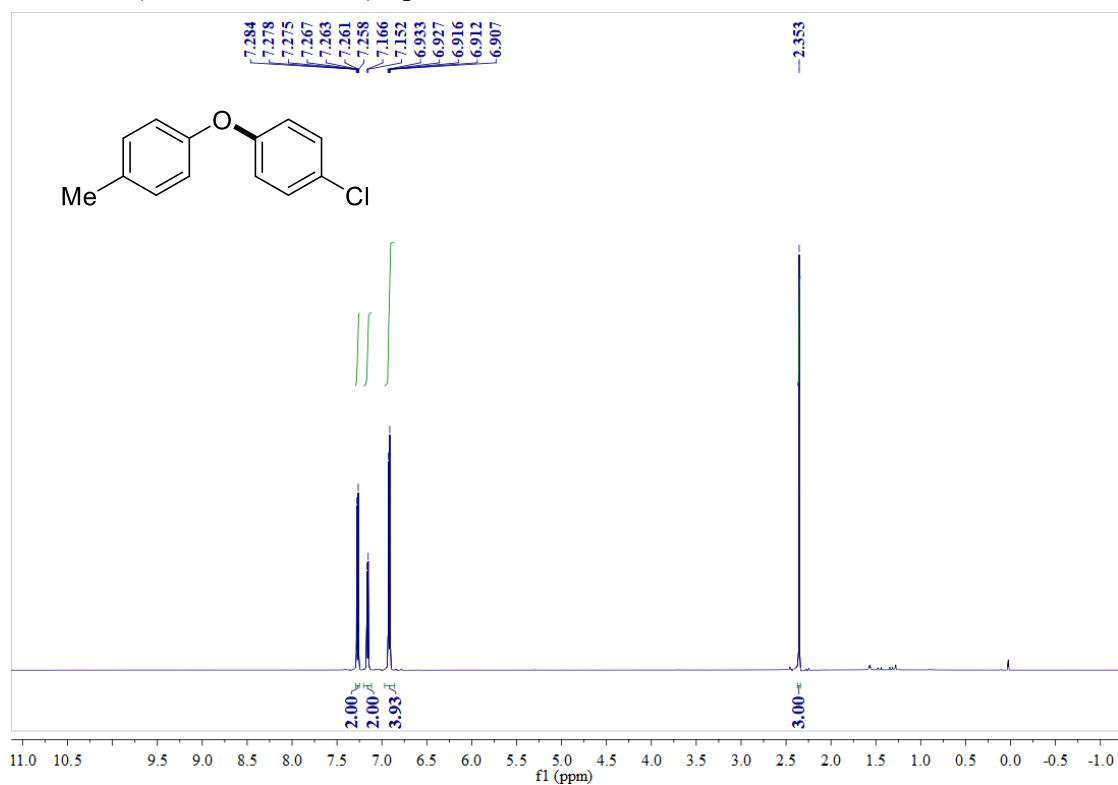

<sup>13</sup>C NMR (151 MHz, CDCl<sub>3</sub>) Spectrum of **11a**

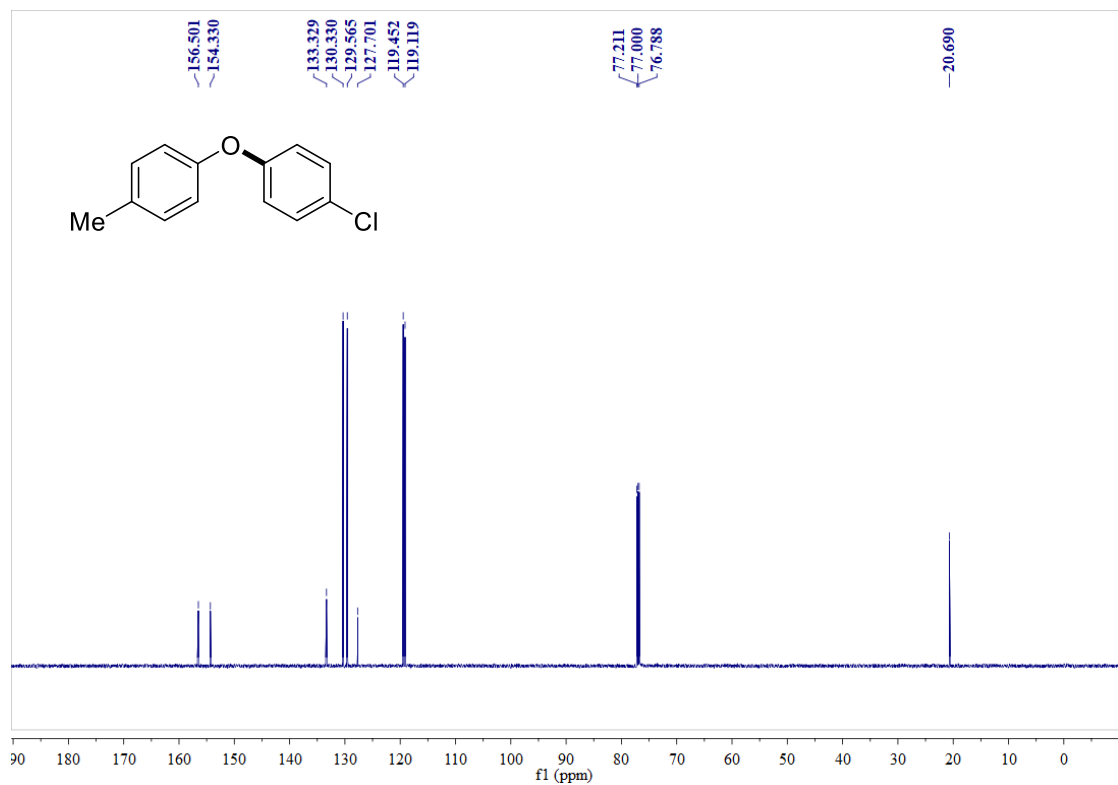

$^1\text{H}$  NMR (600 MHz,  $\text{CDCl}_3$ ) Spectrum of **12a**

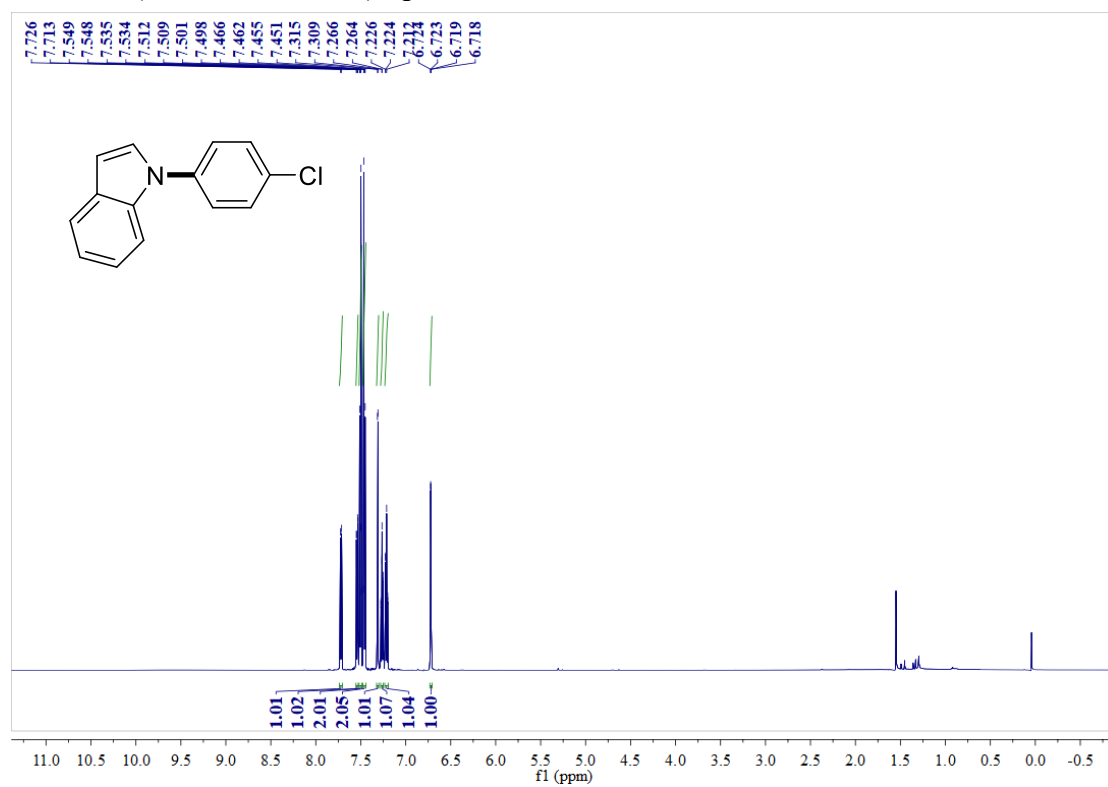

$^{13}\text{C}$  NMR (151 MHz,  $\text{CDCl}_3$ ) Spectrum of **12a**

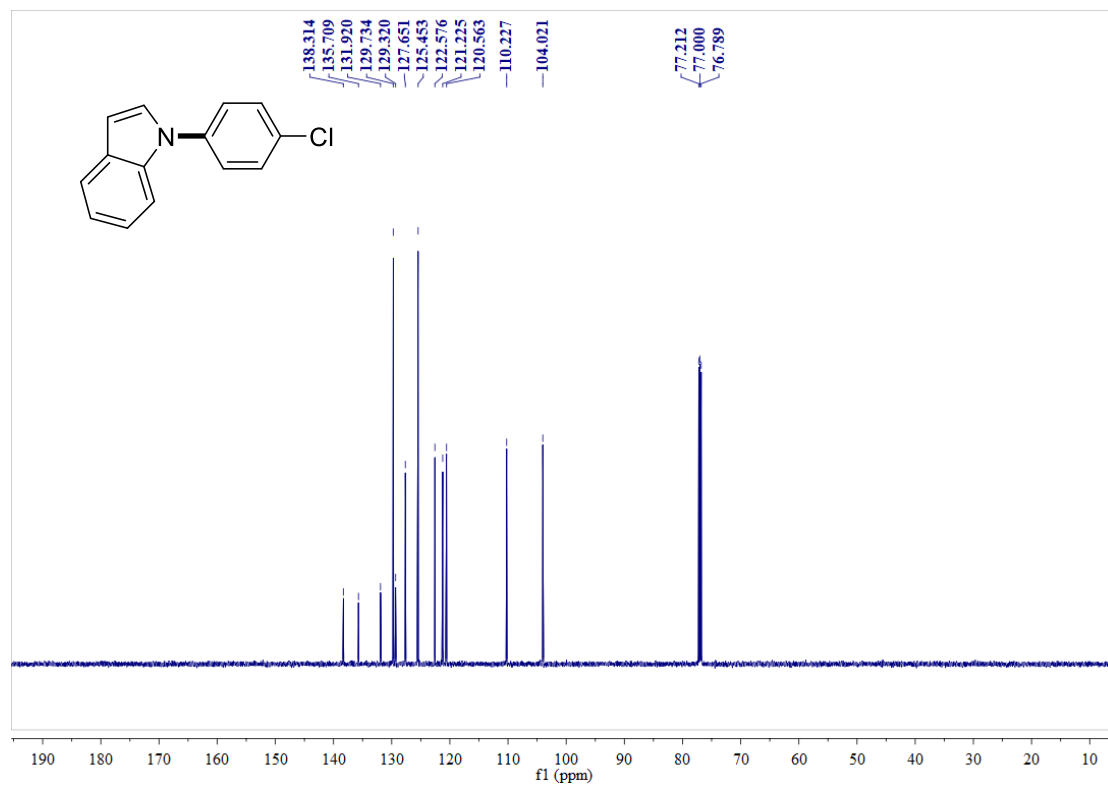

Supplement: d4ob01907e1.pdf [file d4ob01907e1.pdf]
